# Supplementary material for: Copper-catalyzed alkyne oxidation/Büchner-type ring-expansion to access benzo[6,7]azepino[2,3-b]quinolines and pyridine-based diones
Source: PubMed Central journal article supplement (PMC9941089; doi:10.1038/s42004-023-00840-6), 2023-02-20
Supplement: 42004_2023_840_MOESM1_ESM.pdf [file 42004_2023_840_MOESM1_ESM.pdf]

Supplementary Table 1. Crystal data and structure refinement for 3a. CCDC

Number = 2122556

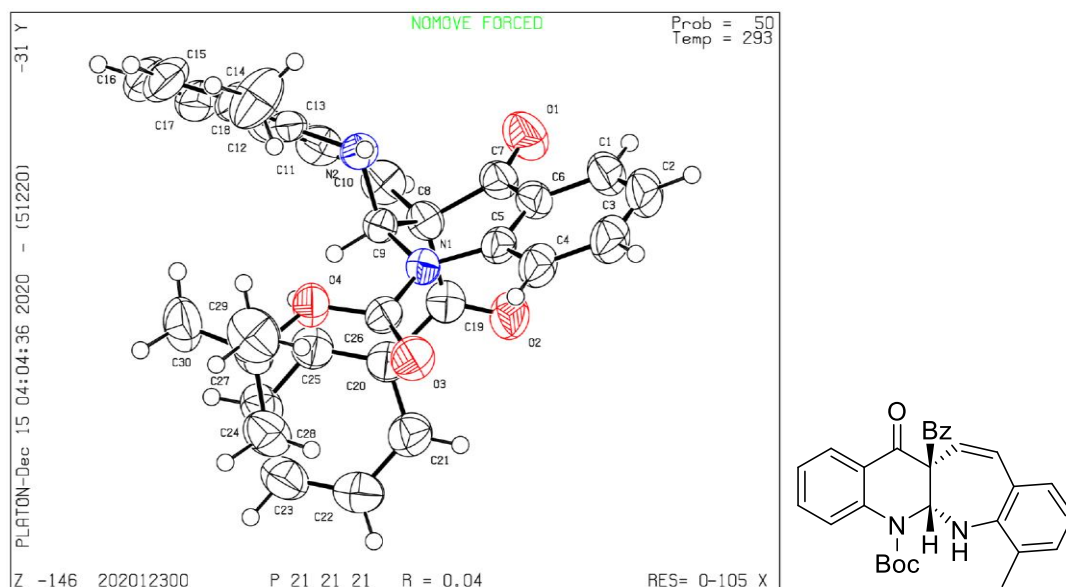

|                        |                |                    |                |
|------------------------|----------------|--------------------|----------------|
| Bond precision:        | C-C = 0.0054 Å | Wavelength=1.54184 |                |
| Cell:                  | a=11.8047 (11) | b=13.4572 (15)     | c=16.0448 (16) |
|                        | alpha=90       | beta=90            | gamma=90       |
| Temperature:           | 293 K          |                    |                |
|                        | Calculated     | Reported           |                |
| Volume                 | 2548.9 (4)     | 2548.9 (4)         |                |
| Space group            | P 21 21 21     | P 21 21 21         |                |
| Hall group             | P 2ac 2ab      | P 2ac 2ab          |                |
| Moiety formula         | C30 H28 N2 O4  | C30 H28 N2 O4      |                |
| Sum formula            | C30 H28 N2 O4  | C30 H28 N2 O4      |                |
| Mr                     | 480.54         | 480.54             |                |
| Dx, g cm <sup>-3</sup> | 1.252          | 1.252              |                |
| Z                      | 4              | 4                  |                |
| Mu (mm <sup>-1</sup> ) | 0.671          | 0.671              |                |
| F000                   | 1016.0         | 1016.0             |                |
| F000'                  | 1019.06        |                    |                |
| h,k,lmax               | 14,16,19       | 14,16,19           |                |
| Nref                   | 4545 [ 2576]   | 4546               |                |
| Tmin,Tmax              | 0.901,0.935    | 0.926,1.000        |                |
| Tmin'                  | 0.892          |                    |                |

Correction method= # Reported T Limits: Tmin=0.926 Tmax=1.000  
AbsCorr = MULTI-SCAN

Data completeness= 1.76/1.00      Theta(max)= 67.076

R(reflections)= 0.0431( 3686)      wR2(reflections)= 0.1060( 4546)

S = 1.006      Npar= 333

Supplementary Table 2. Crystal data and structure refinement for 3r. CCDC

Number = 2126067

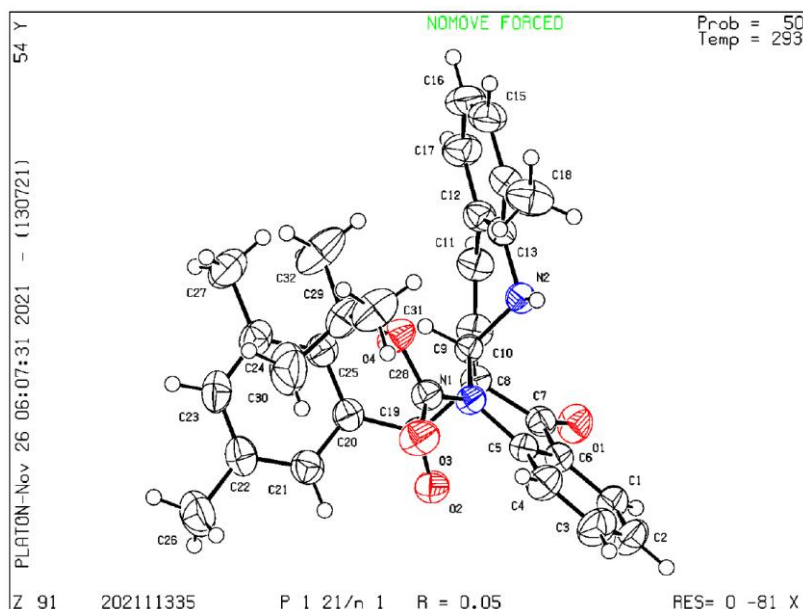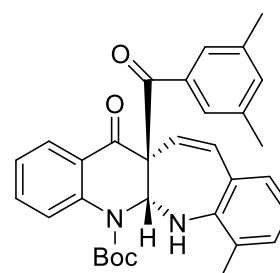

Bond precision: C-C = 0.0032 Å

Wavelength=1.54184

Cell: a=10.10206 (18)

b=16.9389 (3)

c=16.2465 (3)

alpha=90

beta=98.0708 (17)

gamma=90

Temperature: 293 K

|                        | Calculated    | Reported      |
|------------------------|---------------|---------------|
| Volume                 | 2752.53 (9)   | 2752.53 (9)   |
| Space group            | P 21/n        | P 1 21/n 1    |
| Hall group             | -P 2yn        | -P 2yn        |
| Moiety formula         | C32 H32 N2 O4 | C32 H32 N2 O4 |
| Sum formula            | C32 H32 N2 O4 | C32 H32 N2 O4 |
| Mr                     | 508.60        | 508.59        |
| Dx, g cm <sup>-3</sup> | 1.227         | 1.227         |
| Z                      | 4             | 4             |
| Mu (mm <sup>-1</sup> ) | 0.648         | 0.648         |
| F000                   | 1080.0        | 1080.0        |
| F000'                  | 1083.19       |               |
| h, k, lmax             | 12, 20, 19    | 12, 20, 19    |
| Nref                   | 4916          | 4912          |
| Tmin, Tmax             | 0.918, 0.943  | 0.970, 1.000  |
| Tmin'                  | 0.902         |               |

Correction method= # Reported T Limits: Tmin=0.970 Tmax=1.000

AbsCorr = MULTI-SCAN

Data completeness= 0.999

Theta (max)= 67.078

R(reflections)= 0.0494 ( 3903)

wR2(reflections)=

0.1426 ( 4912)

S = 1.029

Npar= 354

**Supplementary Table 3. Crystal data and structure refinement for 3aba. CCDC**

**Number = 2122557**

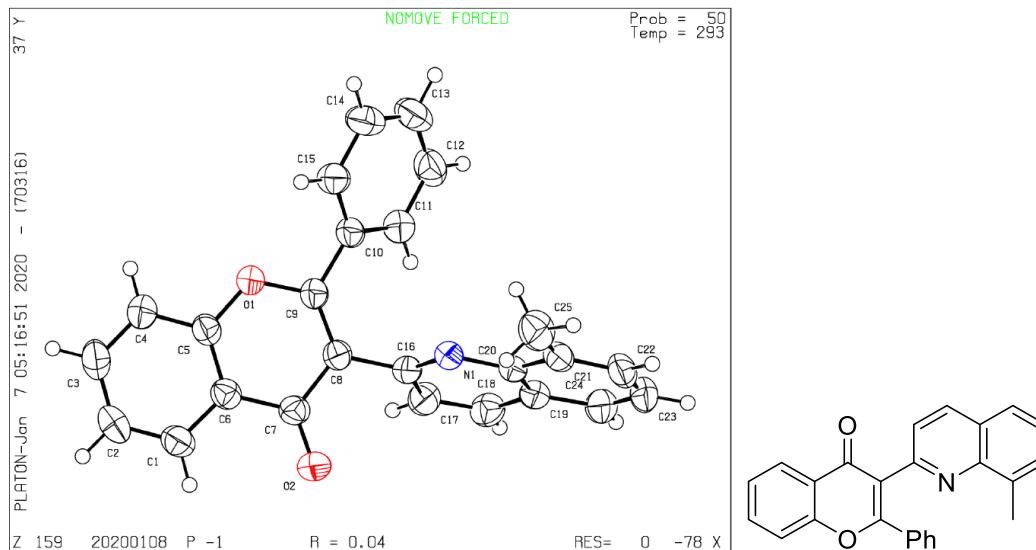

Bond precision: C-C = 0.0024 Å

Wavelength=1.54184

Cell: a=8.7981 (5) b=9.4244 (5) c=12.4880 (7)  
 alpha=100.906 (5) beta=109.593 (5) gamma=101.021 (4)  
 Temperature: 293 K

|                        | Calculated                                       | Reported                                         |
|------------------------|--------------------------------------------------|--------------------------------------------------|
| Volume                 | 920.90 (10)                                      | 920.88 (9)                                       |
| Space group            | P -1                                             | P -1                                             |
| Hall group             | -P 1                                             | -P 1                                             |
| Moiety formula         | C <sub>25</sub> H <sub>17</sub> N O <sub>2</sub> | C <sub>25</sub> H <sub>17</sub> N O <sub>2</sub> |
| Sum formula            | C <sub>25</sub> H <sub>17</sub> N O <sub>2</sub> | C <sub>25</sub> H <sub>17</sub> N O <sub>2</sub> |
| Mr                     | 363.40                                           | 363.39                                           |
| Dx, g cm <sup>-3</sup> | 1.311                                            | 1.311                                            |
| Z                      | 2                                                | 2                                                |
| Mu (mm <sup>-1</sup> ) | 0.660                                            | 0.660                                            |
| F000                   | 380.0                                            | 380.0                                            |
| F000'                  | 381.11                                           |                                                  |
| h,k,lmax               | 10,11,14                                         | 10,11,14                                         |
| Nref                   | 3288                                             | 3285                                             |
| Tmin,Tmax              | 0.917,0.942                                      | 0.744,1.000                                      |
| Tmin'                  | 0.882                                            |                                                  |

Correction method= # Reported T Limits: Tmin=0.744 Tmax=1.000  
 AbsCorr = MULTI-SCAN

Data completeness= 0.999

Theta(max)= 67.065

R(reflections)= 0.0402 ( 2746)

wR2(reflections)= 0.1148 ( 3285)

S = 1.033

Npar= 254

Supplementary Table 4. Crystal data and structure refinement for 5p. CCDC

Number = 2144833

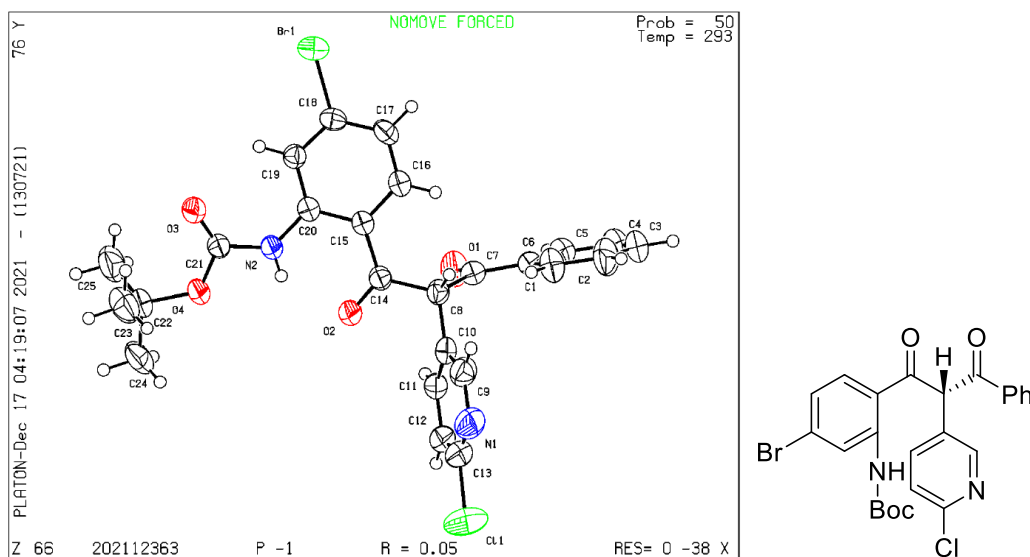

Bond precision: C-C = 0.0053 Å

Wavelength=1.54184

Cell: a=6.8476(4) b=11.6940(7) c=15.8939(12)  
 alpha=91.695(5) beta=99.775(6) gamma=106.165(5)  
 Temperature: 293 K

|                        | Calculated          | Reported            |
|------------------------|---------------------|---------------------|
| Volume                 | 1200.68(14)         | 1200.68(14)         |
| Space group            | P -1                | P -1                |
| Hall group             | -P 1                | -P 1                |
| Moiety formula         | C25 H22 Br Cl N2 O4 | C25 H22 Br Cl N2 O4 |
| Sum formula            | C25 H22 Br Cl N2 O4 | C25 H22 Br Cl N2 O4 |
| Mr                     | 529.80              | 529.80              |
| Dx, g cm <sup>-3</sup> | 1.465               | 1.465               |
| Z                      | 2                   | 2                   |
| Mu (mm <sup>-1</sup> ) | 3.642               | 3.642               |
| F000                   | 540.0               | 540.0               |
| F000'                  | 540.74              |                     |
| h, k, lmax             | 8, 13, 18           | 8, 13, 18           |
| Nref                   | 4270                | 4258                |
| Tmin, Tmax             | 0.678, 0.747        | 0.949, 1.000        |
| Tmin'                  | 0.572               |                     |

Correction method= # Reported T Limits: Tmin=0.949 Tmax=1.000  
 AbsCorr = MULTI-SCAN

Data completeness= 0.997 Theta(max)= 67.079

R(reflections)= 0.0454( 3434)

wR2(reflections)=  
0.1300( 4258)

S = 1.024

Npar= 305

Supplementary Table 5. Crystal data and structure refinement for 8. CCDC

Number = 2122558

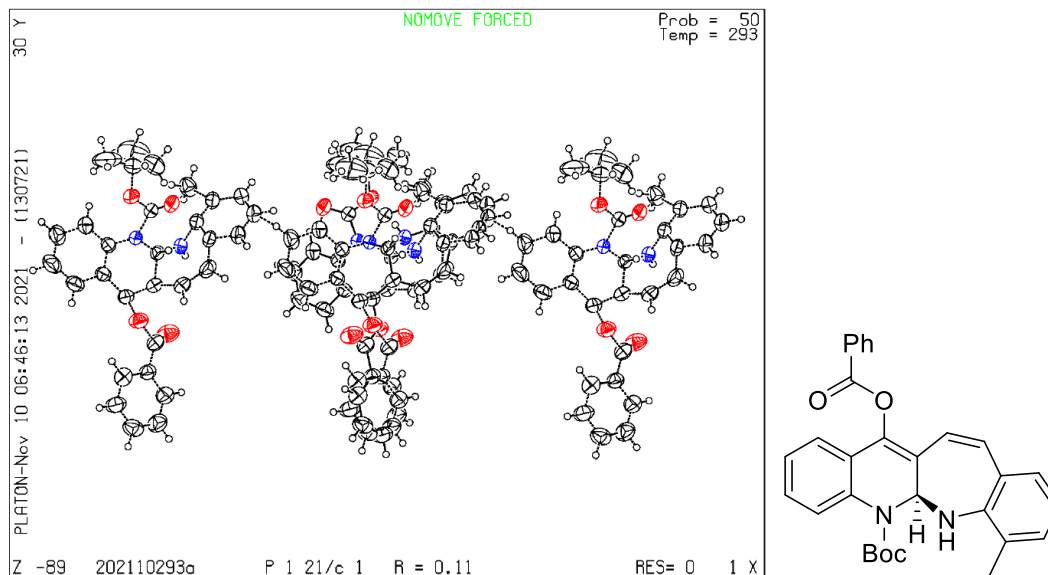

|                        |                                                       |                                                     |               |
|------------------------|-------------------------------------------------------|-----------------------------------------------------|---------------|
| Bond precision:        | = 0.0000 Å                                            | Wavelength=1.54184                                  |               |
| Cell:                  | a=18.9392 (6)                                         | b=10.8598 (3)                                       | c=12.7501 (5) |
|                        | alpha=90                                              | beta=94.781 (3)                                     | gamma=90      |
| Temperature:           | 293 K                                                 |                                                     |               |
|                        | Calculated                                            | Reported                                            |               |
| Volume                 | 2613.26 (15)                                          | 2613.28 (16)                                        |               |
| Space group            | P 21/c                                                | P 1 21/c 1                                          |               |
| Hall group             | -P 2ybc                                               | -P 2ybc                                             |               |
| Moiety formula         | C2.62 H2.46 N0.18 O0.30,<br>C27.39 H25.54 N1.82 O3.70 | C27.38 H25.53 N1.82 O3.7,<br>C2.62 H2.47 N0.18 O0.3 |               |
| Sum formula            | C30 H28 N2 O4                                         | C30 H28 N2 O4                                       |               |
| Mr                     | 480.54                                                | 480.54                                              |               |
| Dx, g cm <sup>-3</sup> | 1.221                                                 | 1.221                                               |               |
| Z                      | 4                                                     | 4                                                   |               |
| Mu (mm <sup>-1</sup> ) | 0.655                                                 | 0.655                                               |               |
| F000                   | 1016.0                                                | 1016.0                                              |               |
| F000'                  | 1019.06                                               |                                                     |               |
| h, k, lmax             | 22, 12, 15                                            | 22, 12, 15                                          |               |
| Nref                   | 4652                                                  | 4621                                                |               |
| Tmin, Tmax             | 0.924, 0.974                                          | 0.983, 1.000                                        |               |
| Tmin'                  | 0.906                                                 |                                                     |               |

Correction method= # Reported T Limits: Tmin=0.983 Tmax=1.000  
AbsCorr = MULTI-SCAN

Data completeness= 0.993                      Theta(max)= 67.076

R(reflections)= 0.1056( 3165)                      wR2(reflections)=  
S = 1.165                                              Npar= 405                                              0.3217( 4621)

## Supplementary Discussion

### More Mechanism Studies

1. To probe the reaction mechanism, control experiments with  $\text{H}_2^{18}\text{O}$  isotopic labeling proved that the oxygen atom in the carbonyl group of **3a** originated from *N*-oxide but not from water.

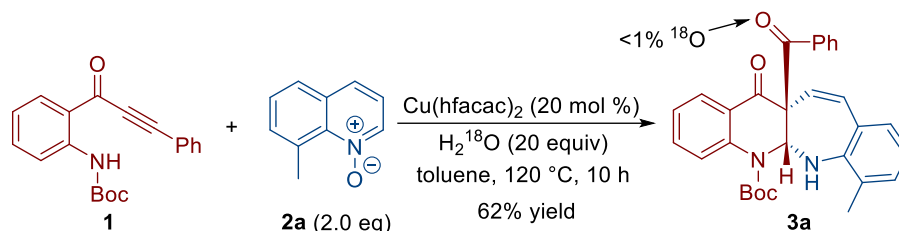

**Supplementary Figure 69.** The effect of water on the copper-catalyzed cascade reaction.

2. The addition of styrene did not significantly affect this cascade cyclization and no cyclopropane formation was observed under standard conditions.

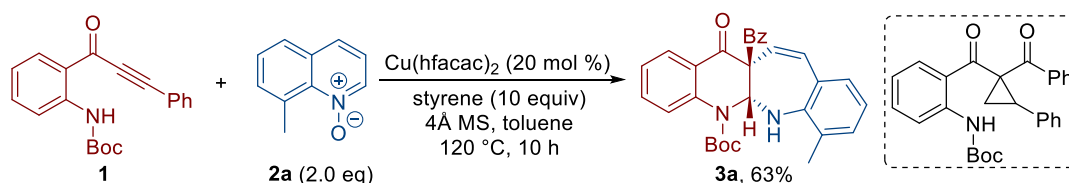

**Supplementary Figure 70.** Trying to trap the reaction intermediate with styrene.

3. Plausible reaction mechanistic scenario for the formation of **3a**, please see as followed.

**a**

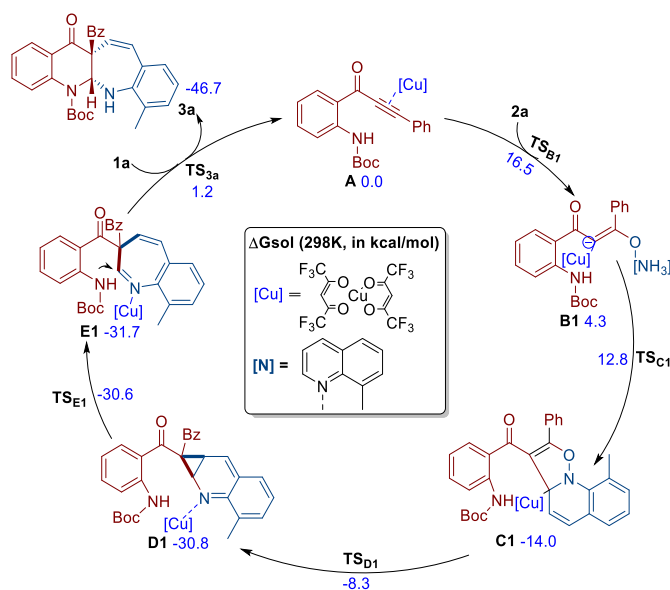

**b**

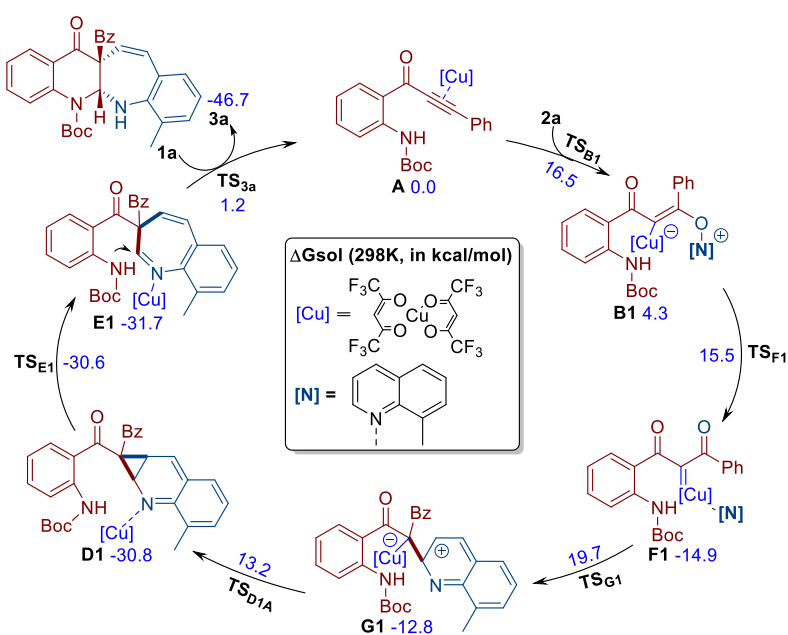

**Supplementary Figure 71.** Two plausible reaction pathways. **a**  $\alpha$ -oxo copper carbene intermediate was not involved. **b**  $\alpha$ -oxo copper carbene intermediate was involved.

4. Plausible reaction mechanism for the formation of **5a**, please see as followed.

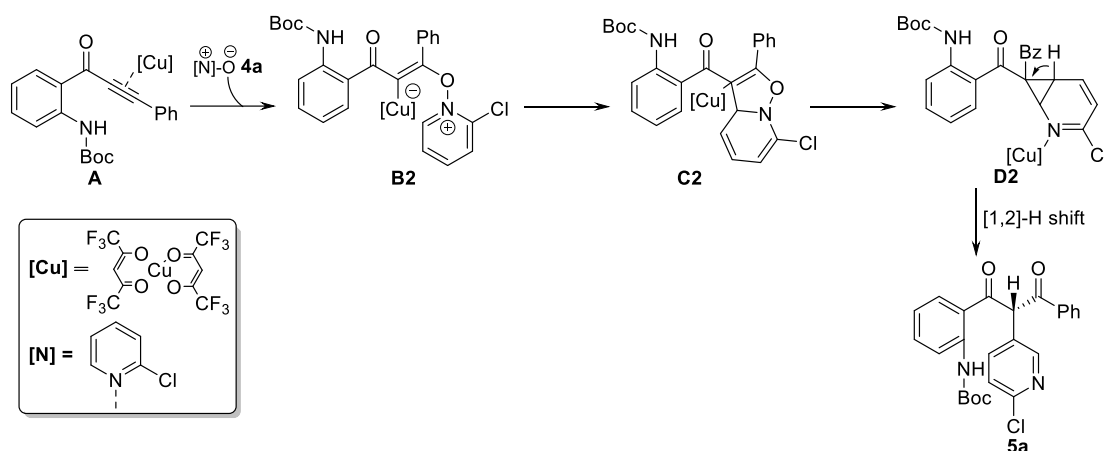

**Supplementary Figure 72.** Plausible reaction pathway.

5. With regard to quinazoline *N*-oxide, these two classes of reactions work to afford benzo[6,7]azepino[2,3-*b*]quinolines. With regard to pyrazine *N*-oxide, these two classes of reactions work to afford pyridine-based diones. A 1:1 mixture of quinazoline *N*-oxide and pyrazine *N*-oxide under the optimized reaction conditions mostly lead to the formation of the benzo[6,7]azepino[2,3-*b*]quinolines.

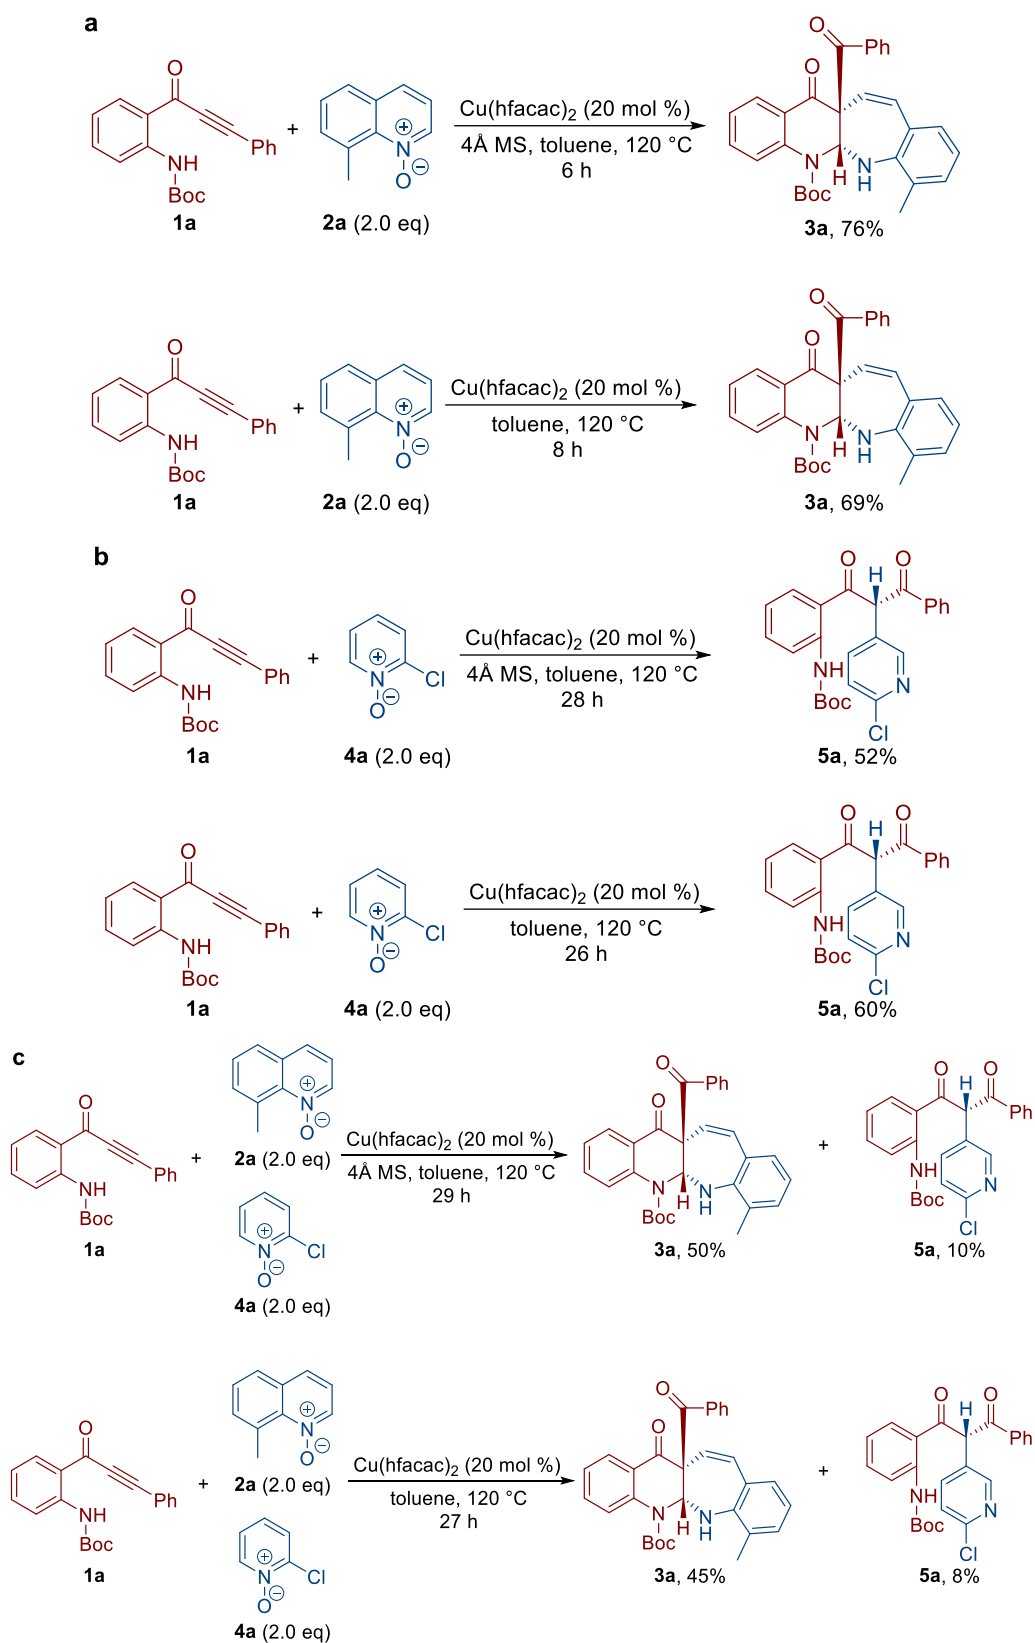

**Supplementary Figure 73.** Control experiments with quinazoline *N*-oxide and pyrazine *N*-oxide.

**a** With regard to quinazoline *N*-oxide. **b** With regard to pyrazine *N*-oxide. **c** A 1:1 mixture of quinazoline *N*-oxide and pyrazine *N*-oxide.



6. Quinoxaline *N*-oxide and pyrazine *N*-oxide were not successful substrates and no corresponding products was observed under standard conditions, respectively.

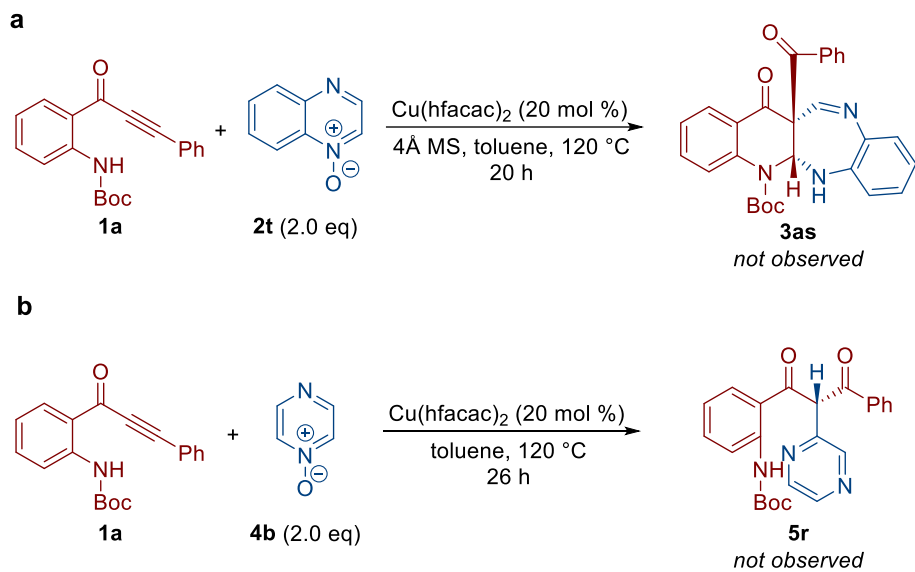

**Supplementary Figure 74.** Substrate expansion. **a** Quinoxaline *N*-oxide. **b** Pyrazine *N*-oxide.

## Supplementary Methods

**General Information.** Ethyl acetate (ACS grade), hexanes (ACS grade) and anhydrous 1,2-dichloroethane (ACS grade) were obtained commercially and used without further purification. Methylene chloride, tetrahydrofuran and diethyl ether were purified according to standard methods unless otherwise noted. Commercially available reagents were used without further purification. Reactions were monitored by thin layer chromatography (TLC) using silicycle pre-coated silica gel plates. Flash column chromatography was performed over silica gel (300-400 mesh). Infrared spectra were recorded on a Nicolet iS 10 spectrometer as thin film and are reported in reciprocal centimeter ( $\text{cm}^{-1}$ ). Mass spectra were recorded with Micromass Q-Exactive Focus mass spectrometer using electron spray ionization.

$^1\text{H}$  NMR spectra were recorded on a Bruker AV-400 spectrometer in chloroform- $\text{d}_3$ . Chemical shifts are reported in ppm with the internal TMS signal at 0.0 ppm as a standard. The data is being reported as (s = singlet, d = doublet, t = triplet, m = multiplet or unresolved, brs = broad singlet, coupling constant(s) in Hz, integration).

$^{13}\text{C}$  NMR spectra were recorded on a Bruker AV-400 spectrometer in chloroform- $\text{d}_3$ . Chemical shifts are reported in ppm with the internal chloroform signal at 77.0 ppm as a standard.

## Experimental Section

### Representative synthetic procedures for the preparation of alkyones **1a-1z**:

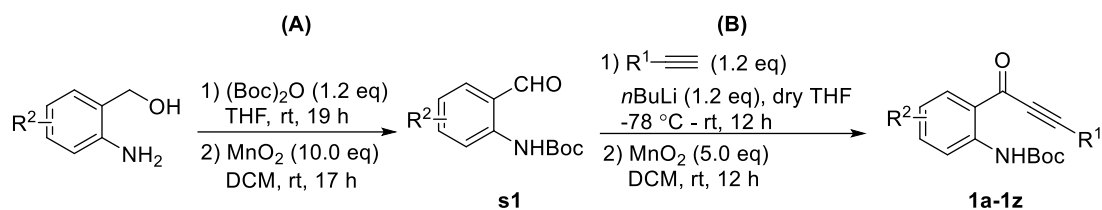

**Supplementary Figure 75.** Representative synthetic procedures for the preparation of ynamides **1** (**1a-1z**).

**(A):** (Boc)<sub>2</sub>O (12.0 mmol, 2616.0 mg) was slowly added to a solution of 2-aminobenzyl alcohol (10.0 mmol) in 20.0 mL THF at room temperature. The reaction mixture was stirred at room temperature and the progress of the reaction was monitored by TLC. The reaction typically took 19 h. Upon completion, the reaction crude was concentrated under vacuum, and the residue was added into a solution of the MnO<sub>2</sub> (100.0 mmol, 8600.0 mg) in DCM (20.0 mL) at room temperature. The reaction mixture was stirred at room temperature and the progress of the reaction was monitored by TLC. The reaction typically took 17 h. Upon completion, the reaction crude was filtered through a Celite plug and concentrated under vacuum, and the residue was purified by chromatography on silica gel (eluent: petroleum ether/ethyl acetate) to afford the desired substrates **s1**.<sup>1</sup>

**(B):** To a solution of acetylene (7.2 mmol) in anhydrous THF was added *n*-BuLi (7.2 mmol, 3.0 mL) at -78 °C under an Ar atmosphere. The resulting solution was stirred at -78 °C for 1 h. Then **s1** (6.0 mmol) in anhydrous THF was added by syringe. The reaction mixture was kept under the inert atmosphere and stirred for 12 h while it warmed to ambient temperature. Upon completion, the mixture was then quenched by adding satd aq NH<sub>4</sub>Cl and the mixture was extracted with ethyl acetate (3 x 30.0 mL). The combined organic layer was washed with brine, dried over MgSO<sub>4</sub>, and concentrated under reduced pressure. The residue was added into a solution of MnO<sub>2</sub> (30.0 mmol, 2580.0 mg) in DCM (20.0 mL) at room temperature. The reaction

mixture was stirred at room temperature and the progress of the reaction was monitored by TLC. The reaction typically took 12 h. Upon completion, the reaction crude was filtered through a Celite plug and concentrated under vacuum, and the residue was purified by chromatography on silica gel (eluent: petroleum ether/ethyl acetate) to afford the desired alkyne substrates **1a-1z**.<sup>2</sup>

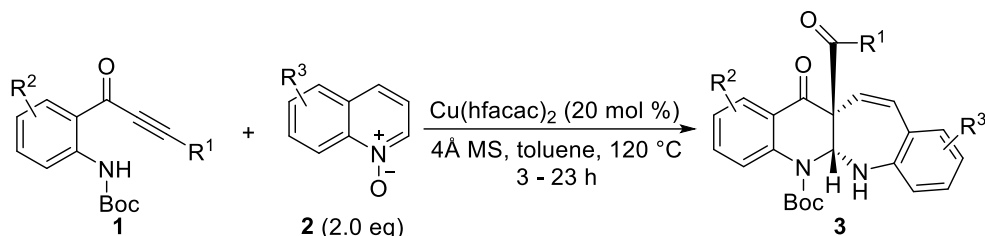

**Supplementary Figure 76.** Synthesis of benzo[6,7]azepino[2,3-*b*]quinolines **3**.

### General procedure for the synthesis of benzo[6,7]azepino[2,3-*b*]quinolines **3**:

Quinoline *N*-oxide **2** (0.4 mmol), 4Å molecular sieves (40 mg) and Cu(hfacac)<sub>2</sub> (0.04 mmol, 19.1 mg) were added in this order to the alkynes **1** (0.2 mmol) in toluene (4.0 mL) at room temperature. The reaction mixture was stirred at 120 °C (120 °C, heating mantle temperature) and the progress of the reaction was monitored by TLC. Upon completion, the mixture was then concentrated and the residue was purified by chromatography on silica gel (eluent: petroleum ether/ethyl acetate) to afford the desired product **3**.

*tert*-butyl

**11a-benzoyl-4-methyl-11-oxo-5,5a,11,11a-tetrahydro-6H-benzo[6,7]azepino[2,3-*b*]quinoline-6-carboxylate (3a)**

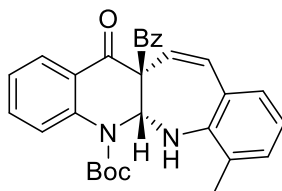

**3a**

The reaction was conducted with *tert*-butyl (2-(3-phenylpropioyl)phenyl)carbamate (**1a**, 0.2 mmol, 64.2 mg), 8-methylquinoline *N*-oxide (**2a**, 0.4 mmol, 63.6 mg), 4Å

molecular sieves (40 mg) and Cu(hfacac)<sub>2</sub> (0.04 mmol, 19.1 mg) in toluene (4.0 mL) at 120 °C (120 °C, heating mantle temperature). Purification by column chromatography on silica gel (petroleum ether/ethyl acetate = 5:1) yielded **3a** (73.1 mg, 76%) as a yellow solid (mp 147-149 °C).

The reaction was conducted with *tert*-butyl (2-(3-phenylpropioloyl)phenyl)carbamate (**1a**, 4.0 mmol, 1284.0 mg), 8-methylquinoline *N*-oxide (**2a**, 8.0 mmol, 1272.0 mg), 4Å molecular sieves (400 mg) and Cu(hfacac)<sub>2</sub> (0.8 mmol, 382.2 mg) in toluene (40.0 mL) at 120 °C (120 °C, oil bath temperature). Purification by column chromatography on silica gel (petroleum ether/ethyl acetate = 5:1) yielded **3a** (1362.9 mg, 71%).

<sup>1</sup>H NMR (400 MHz, CDCl<sub>3</sub>) δ 8.08 (d, *J* = 7.8 Hz, 1H), 8.01 – 7.94 (m, 3H), 7.54 – 7.50 (m, 2H), 7.40 – 7.36 (m, 2H), 7.20 – 7.15 (m, 2H), 7.02 (d, *J* = 7.3 Hz, 1H), 6.87 – 6.80 (m, 2H), 6.34 (s, 1H), 6.20 (d, *J* = 12.4 Hz, 1H), 3.97 (s, 1H), 2.11 (s, 3H), 1.19 (s, 9H); <sup>13</sup>C NMR (100 MHz, CDCl<sub>3</sub>) δ 195.0, 191.5, 151.1, 144.0, 139.2, 135.9, 134.4, 133.3, 132.5, 131.9, 130.2, 129.3, 128.6, 128.3, 124.6, 124.4, 123.0, 122.5, 121.3(4), 121.2(6), 120.9, 83.2, 72.4, 71.1, 27.7, 17.6; IR (neat): 3368(br), 2921, 2851, 1725, 1705, 1699, 1597, 1470, 1369, 1305, 1156, 1145, 1021, 937, 766; HRMS (ESI) *m/z*: [M + H]<sup>+</sup> calcd for C<sub>30</sub>H<sub>29</sub>N<sub>2</sub>O<sub>4</sub> 481.2122, found 481.2115.

#### ***tert*-butyl 2-benzoyl-3-oxoindoline-1-carboxylate (**3a'**)**

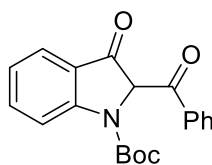

**3a'**

<sup>1</sup>H NMR (400 MHz, CDCl<sub>3</sub>) δ 8.36 (d, *J* = 8.4 Hz, 1H), 8.11 (d, *J* = 7.5 Hz, 2H), 7.69 – 7.65 (m, 3H), 7.56 – 7.53 (m, 2H), 7.15 (t, *J* = 7.3 Hz, 1H), 5.96 (s, 1H), 1.34 (s, 9H); <sup>13</sup>C NMR (100 MHz, CDCl<sub>3</sub>) δ 190.4, 188.9, 154.3, 149.8, 137.7, 134.7, 134.0, 129.6, 128.8, 124.6, 123.2, 116.5, 82.8, 71.2, 27.9; IR (neat): 2928, 1724, 1701, 1650,

1450, 1326, 1150, 795; HRMS (ESI)  $m/z$ :  $[M + H]^+$  calcd for  $C_{20}H_{20}NO_4$  338.1387, found 338.1387.

*tert*-butyl 11a-(4-fluorobenzoyl)-4-methyl-11-oxo-5,5a,11,11a-tetrahydro-6*H*-benzo[6,7]azepino[2,3-*b*]quinoline-6-carboxylate (**3b**)

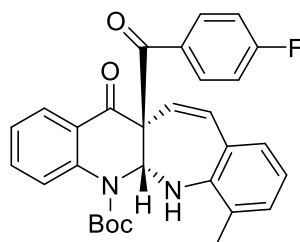

**3b**

The reaction was conducted with *tert*-butyl (2-(3-(4-fluorophenyl)propioloyl)phenyl)carbamate (**1b**, 0.2 mmol, 67.8 mg), 8-methylquinoline *N*-oxide (**2a**, 0.4 mmol, 63.6 mg), 4Å molecular sieves (40 mg) and  $Cu(hfacac)_2$  (0.04 mmol, 19.1 mg) in toluene (4.0 mL) at 120 °C (120 °C, heating mantle temperature). Purification by column chromatography on silica gel (petroleum ether/ethyl acetate = 5:1) yielded **3b** (71.9 mg, 72%) as a pale yellow oil.

$^1H$  NMR (400 MHz,  $CDCl_3$ )  $\delta$  8.13 – 8.05 (m, 3H), 7.92 (d,  $J = 8.0$  Hz, 1H), 7.52 (t,  $J = 7.8$  Hz, 1H), 7.20 (t,  $J = 7.5$  Hz, 1H), 7.15 (d,  $J = 7.1$  Hz, 1H), 7.08 – 7.02 (m, 3H), 6.87 – 6.79 (m, 2H), 6.31 (s, 1H), 6.18 (d,  $J = 12.3$  Hz, 1H), 3.97 (s, 1H), 2.11 (s, 3H), 1.25 (s, 9H);  $^{13}C$  NMR (100 MHz,  $CDCl_3$ )  $\delta$  193.3, 191.5, 165.7 (d,  $J = 254.0$  Hz), 151.2, 144.0, 139.1, 134.4, 132.6, 132.3 (d,  $J = 10.0$  Hz), 132.1 (d,  $J = 3.0$  Hz), 131.9, 130.4, 128.3, 124.7, 124.5, 122.9, 122.4, 121.6, 121.4, 120.9, 115.7 (d,  $J = 22.0$  Hz), 83.3, 72.4, 71.0, 27.7, 17.6; IR (neat): 3400(br), 2920, 2849, 1706, 1670, 1597, 1505, 1458, 1369, 1302, 1236, 1117, 1012, 932, 851; HRMS (ESI)  $m/z$ :  $[M + H]^+$  calcd for  $C_{30}H_{28}FN_2O_4$  499.2028, found 499.2022.

*N*-(2-(1-((4-bromophenyl)sulfonyl)-4-phenyl-1*H*-pyrrole-3-carbonyl)phenyl)benzamide (**3c**)

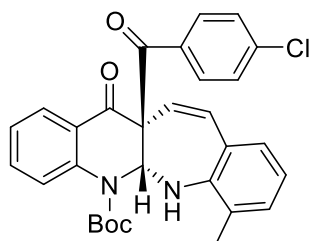

**3c**

The reaction was conducted with *tert*-butyl (2-(3-(4-chlorophenyl)propioloyl)phenyl)carbamate (**1c**, 0.2 mmol, 71.2 mg), 8-methylquinoline *N*-oxide (**2a**, 0.4 mmol, 63.6 mg), 4Å molecular sieves (40 mg) and Cu(hfacac)<sub>2</sub> (0.04 mmol, 19.1 mg) in toluene (4.0 mL) at 120 °C (120 °C, heating mantle temperature). Purification by column chromatography on silica gel (petroleum ether/ethyl acetate = 5:1) yielded **3c** (96.8 mg, 94%) as a pale yellow oil.

<sup>1</sup>H NMR (400 MHz, CDCl<sub>3</sub>) δ 8.06 (d, *J* = 7.8 Hz, 1H), 7.96 – 7.91 (m, 3H), 7.52 (t, *J* = 7.6 Hz, 1H), 7.36 (d, *J* = 7.8 Hz, 2H), 7.21 (t, *J* = 7.5 Hz, 1H), 7.15 (d, *J* = 7.7 Hz, 1H), 7.03 (d, *J* = 7.3 Hz, 1H), 6.88 – 6.80 (m, 2H), 6.29 (s, 1H), 6.16 (d, *J* = 12.3 Hz, 1H), 3.96 (s, 1H), 2.12 (s, 3H), 1.24 (s, 9H); <sup>13</sup>C NMR (100 MHz, CDCl<sub>3</sub>) δ 193.8, 191.4, 151.2, 144.0, 139.9, 139.2, 134.5, 134.1, 132.8, 132.0, 130.9, 130.4, 128.9, 128.3, 124.7, 124.5, 122.9, 122.2, 121.6, 121.3, 121.0, 83.4, 72.4, 71.1, 27.7, 17.6; IR (neat): 3401(br), 2921, 2850, 1705, 1670, 1598, 1471, 1458, 1369, 1242, 1145, 1117, 1012, 882, 766; HRMS (ESI) *m/z*: [M + H]<sup>+</sup> calcd for C<sub>30</sub>H<sub>28</sub>ClN<sub>2</sub>O<sub>4</sub> 515.1732, found 515.1728.

*tert*-butyl 11a-(4-bromobenzoyl)-4-methyl-11-oxo-5,5a,11,11a-tetrahydro-6H-benzo[6,7]azepino[2,3-*b*]quinoline-6-carboxylate (**3d**)

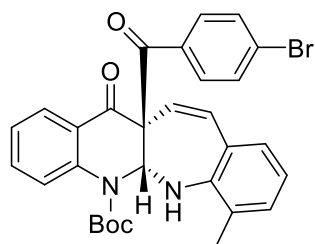

**3d**

The reaction was conducted with *tert*-butyl (2-(3-(4-bromophenyl)propioloyl)phenyl)carbamate (**1d**, 0.2 mmol, 80.0 mg), 8-methylquinoline *N*-oxide (**2a**, 0.4 mmol, 63.6 mg), 4Å molecular sieves (40 mg) and Cu(hfacac)<sub>2</sub> (0.04 mmol, 19.1 mg) in toluene (4.0 mL) at 120 °C (120 °C, heating mantle temperature). Purification by column chromatography on silica gel (petroleum ether/ethyl acetate = 5:1) yielded **3d** (69.3 mg, 62%) as a pale yellow oil.

<sup>1</sup>H NMR (400 MHz, CDCl<sub>3</sub>) δ 8.06 (d, *J* = 7.8 Hz, 1H), 7.93 (d, *J* = 8.5 Hz, 1H), 7.87 (d, *J* = 7.0 Hz, 2H), 7.54 – 7.50 (m, 3H), 7.21 (t, *J* = 7.5 Hz, 1H), 7.15 (d, *J* = 7.7 Hz, 1H), 7.03 (d, *J* = 7.3 Hz, 1H), 6.88 – 6.79 (m, 2H), 6.28 (s, 1H), 6.16 (d, *J* = 12.4 Hz, 1H), 3.96 (s, 1H), 2.12 (s, 3H), 1.25 (s, 9H); <sup>13</sup>C NMR (100 MHz, CDCl<sub>3</sub>) δ 194.0, 191.3, 151.2, 144.0, 139.2, 134.6, 134.5, 132.8, 132.0, 131.9, 130.9, 130.4, 128.6, 128.3, 124.7, 124.5, 122.9, 122.1, 121.5, 121.3, 121.0, 83.4, 72.4, 71.1, 27.7, 17.6; IR (neat): 3401(br), 2924, 1705, 1671, 1598, 1583, 1471, 1458, 1394, 1303, 1145, 1117, 1071, 798, 706; HRMS (ESI) *m/z*: [M + H]<sup>+</sup> calcd for C<sub>30</sub>H<sub>28</sub>BrN<sub>2</sub>O<sub>4</sub> 559.1227, found 559.1224.

*tert*-butyl 4-methyl-11-oxo-11a-(4-(trifluoromethyl)benzoyl)-5,5a,11,11a-tetrahydro-6*H*-benzo[6,7]azepino[2,3-*b*]quinoline-6-carboxylate (**3e**)

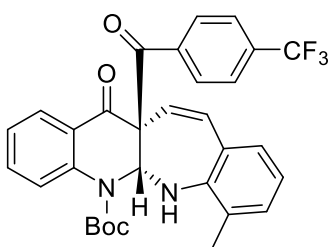



### 3e

The reaction was conducted with *tert*-butyl (2-(3-(4-(trifluoromethyl)phenyl)propioloyl)phenyl)carbamate (**1e**, 0.2 mmol, 77.8 mg), 8-methylquinoline *N*-oxide (**2a**, 0.4 mmol, 63.6 mg), 4Å molecular sieves (40 mg) and Cu(hfacac)<sub>2</sub> (0.04 mmol, 19.1 mg) in toluene (4.0 mL) at 120 °C (120 °C, heating mantle temperature). Purification by column chromatography on silica gel (petroleum ether/ethyl acetate = 5:1) yielded **3e** (90.0 mg, 82%) as a pale yellow oil.

<sup>1</sup>H NMR (400 MHz, CDCl<sub>3</sub>) δ 8.12 – 8.04 (m, 3H), 7.96 – 7.93 (m, 1H), 7.68 – 7.65 (m, 2H), 7.54 (t, *J* = 9.4 Hz, 1H), 7.23 – 7.16 (m, 2H), 7.07 – 7.01 (m, 1H), 6.86 (t, *J* = 14.0 Hz, 2H), 6.28 – 6.27 (m, 1H), 6.17 (d, *J* = 12.4 Hz, 1H), 3.94 (s, 1H), 2.12 (s, 3H), 1.21 (s, 9H); <sup>13</sup>C NMR (100 MHz, CDCl<sub>3</sub>) δ 194.3, 191.0, 151.2, 144.1, 139.2, 134.7, 133.2, 132.0, 130.5, 129.6, 128.5, 125.6 (q, *J* = 6.8 Hz), 124.7, 124.6, 122.9, 121.7, 121.4, 121.1, 83.5, 72.4, 71.2, 27.7, 17.6; IR (neat): 3391(br), 2920, 2849, 1705, 1646, 1600, 1470, 1417, 1370, 1324, 1258, 1130, 1041, 799, 764; HRMS (ESI) *m/z*: [M + H]<sup>+</sup> calcd for C<sub>31</sub>H<sub>28</sub>F<sub>3</sub>N<sub>2</sub>O<sub>4</sub> 549.1996, found 549.1989.

*tert*-butyl 11a-(4-cyanobenzoyl)-4-methyl-11-oxo-5,5a,11,11a-tetrahydro-6*H*-benzo[6,7]azepino[2,3-*b*]quinoline-6-carboxylate (**3f**)

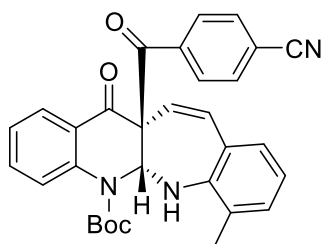

### 3f

The reaction was conducted with *tert*-butyl (2-(3-(4-cyanophenyl)propioloyl)phenyl)carbamate (**1f**, 0.2 mmol, 69.2 mg), 8-methylquinoline *N*-oxide (**2a**, 0.4 mmol, 63.6 mg), 4Å molecular sieves (40 mg) and Cu(hfacac)<sub>2</sub> (0.04 mmol, 19.1 mg) in toluene (4.0 mL) at 120 °C (120 °C, heating

mantle temperature). Purification by column chromatography on silica gel (petroleum ether/ethyl acetate = 5:1) yielded **3f** (73.9 mg, 73%) as a pale yellow oil.

<sup>1</sup>H NMR (400 MHz, CDCl<sub>3</sub>) δ 8.08 (d, *J* = 4.9 Hz, 3H), 7.91 (d, *J* = 7.2 Hz, 1H), 7.70 (d, *J* = 5.5 Hz, 2H), 7.59 – 7.50 (m, 1H), 7.23 – 7.15 (m, 2H), 7.04 (d, *J* = 6.0 Hz, 1H), 6.87 – 6.82 (m, 2H), 6.27 (s, 1H), 6.15 (d, *J* = 11.1 Hz, 1H), 3.98 (s, 1H), 2.12 (s, 3H), 1.27 (s, 9H); <sup>13</sup>C NMR (100 MHz, CDCl<sub>3</sub>) δ 194.0, 190.9, 151.2, 144.0, 139.2, 134.8, 133.3, 132.3, 132.0, 130.6, 129.8, 128.4, 124.8, 124.7, 122.8, 121.8, 121.4, 121.3, 121.1, 116.5, 83.6, 72.2, 71.3, 27.8, 17.6; IR (neat): 3446(br), 2924, 2853, 2231, 1704, 1697, 1656, 1471, 1395, 1291, 1145, 1088, 1041, 850, 708; HRMS (ESI) *m/z*: [*M* + *H*]<sup>+</sup> calcd for C<sub>31</sub>H<sub>28</sub>N<sub>3</sub>O<sub>4</sub> 506.2074, found 506.2072.

*tert*-butyl                      **11a**-([1,1'-biphenyl]-4-carbonyl)-4-methyl-11-oxo-5,5a,11,11a-tetrahydro-6*H*-benzo[6,7]azepino[2,3-*b*]quinoline-6-carboxylate (**3g**)

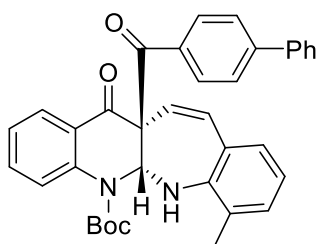

**3g**

The reaction was conducted with *tert*-butyl (2-(3-([1,1'-biphenyl]-4-yl)propioloyl)phenyl)carbamate (**1g**, 0.2 mmol, 79.4 mg), 8-methylquinoline *N*-oxide (**2a**, 0.4 mmol, 63.6 mg), 4Å molecular sieves (40 mg) and Cu(hfacac)<sub>2</sub> (0.04 mmol, 19.1 mg) in toluene (4.0 mL) at 120 °C (120 °C, heating mantle temperature). Purification by column chromatography on silica gel (petroleum ether/ethyl acetate = 5:1) yielded **3g** (102.5 mg, 92%) as a pale yellow oil.

<sup>1</sup>H NMR (400 MHz, CDCl<sub>3</sub>) δ 8.09 (d, *J* = 7.9 Hz, 3H), 7.97 (d, *J* = 7.8 Hz, 1H), 7.61 – 7.39 (m, 8H), 7.23 – 7.17 (m, 2H), 7.03 (d, *J* = 7.0 Hz, 1H), 6.88 – 6.83 (m, 2H), 6.38 (s, 1H), 6.24 (d, *J* = 12.3 Hz, 1H), 3.99 (s, 1H), 2.13 (s, 3H), 1.19 (s, 9H); <sup>13</sup>C NMR (100 MHz, CDCl<sub>3</sub>) δ 194.4, 191.6, 151.2, 146.0, 144.0, 139.6, 139.2, 134.5,

134.4, 132.6, 132.0, 130.3, 130.0, 129.0, 128.3(4), 128.3(2), 127.1(8), 127.1(6), 124.6, 124.4, 123.1, 122.6, 121.4, 121.3, 120.9, 83.2, 72.5, 71.2, 27.7, 17.7; IR (neat): 3401(br), 2925, 2853, 1867, 1725, 1705, 1668, 1557, 1470, 1458, 1306, 1194, 1041, 932, 874; HRMS (ESI)  $m/z$ :  $[M + H]^+$  calcd for  $C_{36}H_{33}N_2O_4$  557.2435, found 557.2430.

***tert*-butyl 4-methyl-11a-(4-methylbenzoyl)-11-oxo-5,5a,11,11a-tetrahydro-6*H*-benzo[6,7]azepino[2,3-*b*]quinoline-6-carboxylate (3h)**

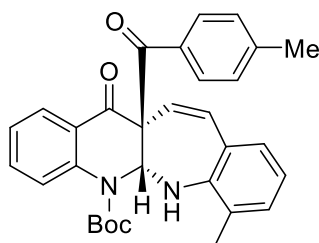

**3h**

The reaction was conducted with *tert*-butyl (2-(3-(*p*-tolyl)propioloyl)phenyl)carbamate (**1h**, 0.2 mmol, 64.2 mg), 8-methylquinoline *N*-oxide (**2a**, 0.4 mmol, 67.0 mg), 4Å molecular sieves (40 mg) and  $Cu(hfacac)_2$  (0.04 mmol, 19.1 mg) in toluene (4.0 mL) at 120 °C (120 °C, heating mantle temperature). Purification by column chromatography on silica gel (petroleum ether/ethyl acetate = 5:1) yielded **3h** (92.1 mg, 93%) as a pale yellow oil.

$^1H$  NMR (400 MHz,  $CDCl_3$ )  $\delta$  8.06 (d,  $J = 7.7$  Hz, 1H), 7.95 – 7.89 (m, 3H), 7.51 (t,  $J = 7.8$  Hz, 1H), 7.22 – 7.14 (m, 4H), 7.02 (d,  $J = 7.0$  Hz, 1H), 6.87 – 6.78 (m, 2H), 6.33 (s, 1H), 6.20 (d,  $J = 12.3$  Hz, 1H), 3.96 (s, 1H), 2.35 (s, 3H), 2.12 (s, 3H), 1.20 (s, 9H);  $^{13}C$  NMR (100 MHz,  $CDCl_3$ )  $\delta$  194.5, 191.8, 151.2, 144.2, 144.0, 139.2, 134.3, 133.3, 132.3, 131.9, 130.2, 129.6, 129.2, 128.3, 124.6, 124.4, 123.1, 122.8, 121.4, 120.8, 83.1, 72.5, 71.1, 27.6, 21.6, 17.7; IR (neat): 3401(br), 2974, 2923, 2852, 1725, 1704, 1667, 1599, 1458, 1306, 1256, 1116, 1041, 931, 884; HRMS (ESI)  $m/z$ :  $[M + H]^+$  calcd for  $C_{31}H_{31}N_2O_4$  495.2278, found 495.2274.

***tert*-butyl 11a-(4-ethylbenzoyl)-4-methyl-11-oxo-5,5a,11,11a-tetrahydro-6*H*-benzo[6,7]azepino[2,3-*b*]quinoline-6-carboxylate (3i)**

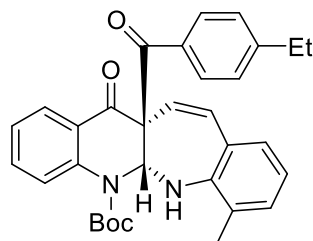

**3i**

The reaction was conducted with *tert*-butyl (2-(3-(4-ethylphenyl)propioloyl)phenyl)carbamate (**1i**, 0.2 mmol, 69.8 mg), 8-methylquinoline *N*-oxide (**2a**, 0.4 mmol, 63.6 mg), 4Å molecular sieves (40 mg) and Cu(hfacac)<sub>2</sub> (0.04 mmol, 19.1 mg) in toluene (4.0 mL) at 120 °C (120 °C, heating mantle temperature). Purification by column chromatography on silica gel (petroleum ether/ethyl acetate = 5:1) yielded **3i** (91.6 mg, 90%) as a pale yellow oil.

<sup>1</sup>H NMR (400 MHz, CDCl<sub>3</sub>) δ 8.08 (d, *J* = 7.8 Hz, 1H), 7.95 – 7.90 (m, 3H), 7.51 (t, *J* = 7.9 Hz, 1H), 7.21 – 7.15 (m, 4H), 7.02 (d, *J* = 7.3 Hz, 1H), 6.87 – 6.79 (m, 2H), 6.35 (s, 1H), 6.20 (d, *J* = 12.3 Hz, 1H), 3.97 (s, 1H), 2.65 (q, *J* = 7.5 Hz, 2H), 2.11 (s, 3H), 1.22 – 1.18 (m, 12H); <sup>13</sup>C NMR (100 MHz, CDCl<sub>3</sub>) δ 194.5, 191.7, 151.1, 150.4, 144.0, 139.2, 134.3, 133.4, 132.3, 131.9, 130.2, 129.7, 128.3, 128.1, 124.6, 124.3, 123.1, 122.8, 121.4, 120.8, 83.0, 72.5, 71.1, 28.9, 27.7, 17.6, 15.1; IR (neat): 3401(br), 2971, 2928, 1726, 1705, 1668, 1600, 1470, 1458, 1411, 1156, 1145, 1015, 884, 798; HRMS (ESI) *m/z*: [M + H]<sup>+</sup> calcd for C<sub>32</sub>H<sub>33</sub>N<sub>2</sub>O<sub>4</sub> 509.2435, found 509.2432.

***tert*-butyl 11a-(4-(*tert*-butyl)benzoyl)-4-methyl-11-oxo-5,5a,11,11a-tetrahydro-6*H*-benzo[6,7]azepino[2,3-*b*]quinoline-6-carboxylate (3j)**

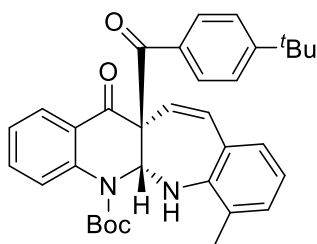

**3j**

The reaction was conducted with *tert*-butyl (2-(3-(4-(*tert*-butyl)phenyl)propioloyl)phenyl)carbamate (**1j**, 0.2 mmol, 75.4 mg), 8-methylquinoline *N*-oxide (**2a**, 0.4 mmol, 63.6 mg), 4Å molecular sieves (40 mg) and Cu(hfacac)<sub>2</sub> (0.04 mmol, 19.1 mg) in toluene (4.0 mL) at 120 °C (120 °C, heating mantle temperature). Purification by column chromatography on silica gel (petroleum ether/ethyl acetate = 5:1) yielded **3j** (88.1 mg, 82%) as a pale yellow oil.

<sup>1</sup>H NMR (400 MHz, CDCl<sub>3</sub>) δ 8.10 (d, *J* = 7.6 Hz, 1H), 7.99 – 7.94 (m, 3H), 7.51 (t, *J* = 7.7 Hz, 1H), 7.40 (d, *J* = 8.5 Hz, 2H), 7.21 – 7.16 (m, 2H), 7.02 (s, 1H), 6.86 – 6.79 (m, 2H), 6.38 (s, 1H), 6.20 (d, *J* = 12.3 Hz, 1H), 3.97 (s, 1H), 2.11 (s, 3H), 1.29 (s, 9H), 1.15 (s, 9H); <sup>13</sup>C NMR (100 MHz, CDCl<sub>3</sub>) δ 194.4, 191.6, 157.2, 151.1, 144.0, 139.1, 134.3, 133.1, 132.3, 131.9, 130.2, 129.5, 128.3, 125.6, 124.6, 124.3, 123.1, 122.8, 121.3, 120.8, 83.0, 72.4, 71.1, 35.1, 30.9, 27.6, 17.6; IR (neat): 3401(br), 2965, 2927, 1727, 1705, 1668, 1600, 1470, 1458, 1394, 1256, 1156, 1041, 933, 798; HRMS (ESI) *m/z*: [M + H]<sup>+</sup> calcd for C<sub>34</sub>H<sub>37</sub>N<sub>2</sub>O<sub>4</sub> 537.2748, found 537.2742.

*tert*-butyl 11a-(4-methoxybenzoyl)-4-methyl-11-oxo-5,5a,11,11a-tetrahydro-6*H*-benzo[6,7]azepino[2,3-*b*]quinoline-6-carboxylate (**3k**)

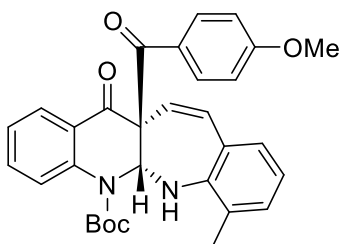

**3k**

The reaction was conducted with *tert*-butyl (2-(3-(4-methoxyphenyl)propioloyl)phenyl)carbamate (**1k**, 0.2 mmol, 70.2 mg), 8-methylquinoline *N*-oxide (**2a**, 0.4 mmol, 63.6 mg), 4Å molecular sieves (40 mg) and Cu(hfacac)<sub>2</sub> (0.04 mmol, 19.1 mg) in toluene (4.0 mL) at 120 °C (120 °C, heating mantle temperature). Purification by column chromatography on silica gel (petroleum ether/ethyl acetate = 5:1) yielded **3k** (85.8 mg, 84%) as a pale yellow oil.

<sup>1</sup>H NMR (400 MHz, CDCl<sub>3</sub>) δ 8.07 – 8.02 (m, 3H), 7.92 (d, *J* = 8.5 Hz, 1H), 7.51 (t, *J* = 7.8 Hz, 1H), 7.20 – 7.14 (m, 2H), 7.02 (d, *J* = 7.2 Hz, 1H), 6.87 – 6.77 (m, 4H), 6.35 (s, 1H), 6.21 (d, *J* = 12.3 Hz, 1H), 3.97 (s, 1H), 3.83 (s, 3H), 2.12 (s, 3H), 1.23 (s, 9H); <sup>13</sup>C NMR (100 MHz, CDCl<sub>3</sub>) δ 193.1, 192.0, 163.6, 151.2, 144.0, 139.2, 134.2, 132.1, 132.0, 131.9, 130.2, 128.4, 128.2, 124.6, 124.4, 123.1, 123.0, 121.6, 120.8, 113.7, 83.1, 72.4, 70.9, 55.5, 27.7, 17.7; IR (neat): 3400(br), 2921, 2850, 1704, 1660, 1598, 1508, 1470, 1458, 1417, 1255, 1170, 1021, 884, 765; HRMS (ESI) *m/z*: [M + H]<sup>+</sup> calcd for C<sub>31</sub>H<sub>31</sub>N<sub>2</sub>O<sub>5</sub> 511.2227, found 511.2224.

### *N*-(2-(4-(thiophen-3-yl)-1-tosyl-1*H*-pyrrole-3-carbonyl)phenyl)benzamide (**3l**)

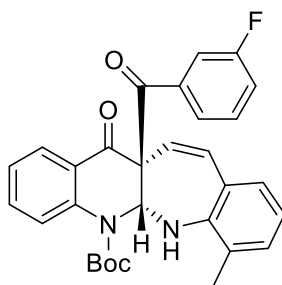

**3l**

The reaction was conducted with *tert*-butyl (2-(3-(3-fluorophenyl)propioloyl)phenyl)carbamate (**1l**, 0.2 mmol, 67.8 mg), 8-methylquinoline *N*-oxide (**2a**, 0.4 mmol, 63.6 mg), 4Å molecular sieves (40 mg) and Cu(hfacac)<sub>2</sub> (0.04 mmol, 19.1 mg) in toluene (4.0 mL) at 120 °C (120 °C, heating mantle temperature). Purification by column chromatography on silica gel (petroleum ether/ethyl acetate = 5:1) yielded **3l** (74.9 mg, 75%) as a pale yellow oil.

$^1\text{H}$  NMR (400 MHz,  $\text{CDCl}_3$ )  $\delta$  8.07 (d,  $J = 7.8$  Hz, 1H), 7.93 (d,  $J = 8.4$  Hz, 1H), 7.84 (d,  $J = 7.2$  Hz, 1H), 7.65 (d,  $J = 9.5$  Hz, 1H), 7.53 (t,  $J = 7.8$  Hz, 1H), 7.40 – 7.36 (m, 1H), 7.23 – 7.15 (m, 3H), 7.03 (d,  $J = 6.9$  Hz, 1H), 6.88 – 6.81 (m, 2H), 6.31 (s, 1H), 6.17 (d,  $J = 12.3$  Hz, 1H), 3.97 (s, 1H), 2.11 (s, 3H), 1.24 (s, 9H);  $^{13}\text{C}$  NMR (100 MHz,  $\text{CDCl}_3$ )  $\delta$  193.8, 191.2, 162.5 (d,  $J = 247.0$  Hz), 151.2, 144.0, 139.1, 137.8 (d,  $J = 7.0$  Hz), 134.5, 132.9, 132.0, 130.4, 130.3 (d,  $J = 8.0$  Hz), 128.4, 125.1 (d,  $J = 3.0$  Hz), 124.6, 124.5, 122.9, 122.0, 121.5, 121.2, 121.0, 120.4 (d,  $J = 21.0$  Hz), 116.2 (d,  $J = 23.0$  Hz), 83.3, 72.3, 71.2, 27.7, 17.6; IR (neat): 3401(br), 2923, 2852, 1705, 1678, 1598, 1585, 1471, 1458, 1434, 1304, 1146, 832, 729; HRMS (ESI)  $m/z$ :  $[\text{M} + \text{H}]^+$  calcd for  $\text{C}_{30}\text{H}_{28}\text{FN}_2\text{O}_4$  499.2028, found 499.2023.

*tert*-butyl 11a-(3-chlorobenzoyl)-4-methyl-11-oxo-5,5a,11,11a-tetrahydro-6*H*-benzo[6,7]azepino[2,3-*b*]quinoline-6-carboxylate (**3m**)

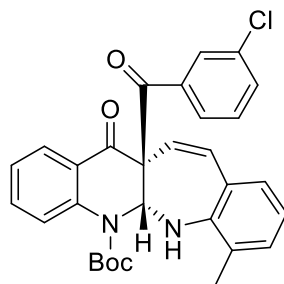

**3m**

The reaction was conducted with *tert*-butyl (2-(3-(3-chlorophenyl)propioloyl)phenyl)carbamate (**1m**, 0.2 mmol, 71.2 mg), 8-methylquinoline *N*-oxide (**2a**, 0.4 mmol, 63.6 mg), 4Å molecular sieves (40 mg) and  $\text{Cu}(\text{hfacac})_2$  (0.04 mmol, 19.1 mg) in toluene (4.0 mL) at 120 °C (120 °C, heating mantle temperature). Purification by column chromatography on silica gel (petroleum ether/ethyl acetate = 5:1) yielded **3m** (81.4 mg, 79%) as a pale yellow oil.

$^1\text{H}$  NMR (400 MHz,  $\text{CDCl}_3$ )  $\delta$  8.07 (d,  $J = 7.8$  Hz, 1H), 7.98 – 7.92 (m, 3H), 7.55 – 7.49 (m, 2H), 7.33 (t,  $J = 7.9$  Hz, 1H), 7.24 – 7.16 (m, 2H), 7.03 (d,  $J = 7.3$  Hz, 1H), 6.88 – 6.82 (m, 2H), 6.30 (s, 1H), 6.16 (d,  $J = 12.4$  Hz, 1H), 3.97 (s, 1H), 2.12 (s, 3H), 1.24 (s, 9H);  $^{13}\text{C}$  NMR (100 MHz,  $\text{CDCl}_3$ )  $\delta$  193.8, 191.1, 151.1, 144.0, 139.1, 137.4,

134.9, 134.6, 133.2, 133.0, 132.0, 130.4, 129.9, 129.4, 128.4, 127.4, 124.6, 124.5, 122.9, 121.9, 121.5, 121.2, 121.0, 83.4, 72.3, 71.2, 27.7, 17.6; IR (neat): 3401(br), 2975, 2921, 2851, 1867, 1828, 1790, 1770, 1728, 1672, 1598, 1506, 1041, 797, 674; HRMS (ESI)  $m/z$ :  $[M + H]^+$  calcd for  $C_{30}H_{28}ClN_2O_4$  515.1732, found 515.1729.

***tert*-butyl 4-methyl-11a-(3-methylbenzoyl)-11-oxo-5,5a,11,11a-tetrahydro-6*H*-benzo[6,7]azepino[2,3-*b*]quinoline-6-carboxylate (3n)**

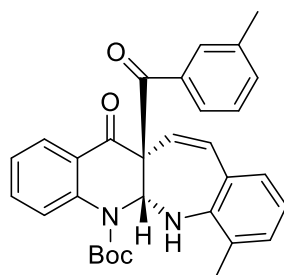

**3n**

The reaction was conducted with *tert*-butyl (2-(3-(m-tolyl)propioloyl)phenyl)carbamate (**1n**, 0.2 mmol, 67.0 mg), 8-methylquinoline *N*-oxide (**2a**, 0.4 mmol, 63.6 mg), 4Å molecular sieves (40 mg) and  $Cu(hfacac)_2$  (0.04 mmol, 19.1 mg) in toluene (4.0 mL) at 120 °C (120 °C, heating mantle temperature). Purification by column chromatography on silica gel (petroleum ether/ethyl acetate = 5:1) yielded **3n** (90.1 mg, 91%) as a pale yellow oil.

$^1H$  NMR (400 MHz,  $CDCl_3$ )  $\delta$  8.07 (d,  $J = 7.8$  Hz, 1H), 7.96 (d,  $J = 8.5$  Hz, 1H), 7.84 (d,  $J = 7.6$  Hz, 1H), 7.75 (s, 1H), 7.51 (t,  $J = 7.8$  Hz, 1H), 7.33 (d,  $J = 7.5$  Hz, 1H), 7.22 – 7.15 (m, 2H), 7.02 (d,  $J = 7.2$  Hz, 1H), 6.87 – 6.80 (m, 2H), 6.33 (s, 1H), 6.20 (d,  $J = 12.4$  Hz, 1H), 3.96 (s, 1H), 2.31 (s, 3H), 2.12 (s, 3H), 1.19 (s, 9H);  $^{13}C$  NMR (100 MHz,  $CDCl_3$ )  $\delta$  195.2, 191.6, 151.1, 144.1, 139.2, 138.5, 136.0, 134.4, 134.1, 132.4, 131.9, 130.2, 129.8, 128.4, 128.3, 126.5, 124.6, 124.4, 123.1, 122.7, 121.3, 120.9, 83.1, 72.5, 71.2, 27.6, 21.3, 17.7; IR (neat): 3420(br), 2922, 2851, 1704, 1668, 1598, 1470, 1458, 1417, 1304, 1259, 1145, 1118, 853, 706; HRMS (ESI)  $m/z$ :  $[M + H]^+$  calcd for  $C_{31}H_{31}N_2O_4$  495.2278, found 495.2279.



***tert*-butyl 11a-(2-chlorobenzoyl)-4-methyl-11-oxo-5,5a,11,11a-tetrahydro-6H-benzo[6,7]azepino[2,3-*b*]quinoline-6-carboxylate (3o)**

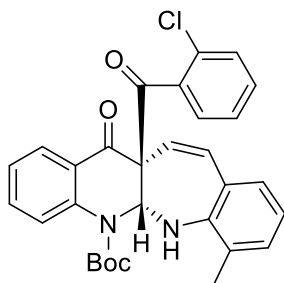

**3o**

The reaction was conducted with *tert*-butyl (2-(3-(2-chlorophenyl)propioloyl)phenyl)carbamate (**1o**, 0.2 mmol, 71.2 mg), 8-methylquinoline *N*-oxide (**2a**, 0.4 mmol, 63.6 mg), 4Å molecular sieves (40 mg) and Cu(hfacac)<sub>2</sub> (0.04 mmol, 19.1 mg) in toluene (4.0 mL) at 120 °C (120 °C, heating mantle temperature). Purification by column chromatography on silica gel (petroleum ether/ethyl acetate = 5:1) yielded **3o** (72.1 mg, 70%) as a pale yellow oil.

<sup>1</sup>H NMR (400 MHz, CDCl<sub>3</sub>) δ 8.12 (d, *J* = 6.1 Hz, 1H), 8.02 (d, *J* = 5.3 Hz, 1H), 7.56 (t, *J* = 8.3 Hz, 1H), 7.49 (d, *J* = 5.7 Hz, 1H), 7.38 – 7.29 (m, 2H), 7.22 – 7.19 (m, 2H), 7.11 (d, *J* = 5.6 Hz, 1H), 7.00 (d, *J* = 5.5 Hz, 1H), 6.83 (t, *J* = 7.4 Hz, 1H), 6.76 (d, *J* = 12.5 Hz, 1H), 6.17 (d, *J* = 12.4 Hz, 1H), 6.05 (s, 1H), 3.92 (s, 1H), 2.13 (s, 3H), 1.36 (s, 9H); <sup>13</sup>C NMR (100 MHz, CDCl<sub>3</sub>) δ 196.5, 190.1, 151.5, 144.5, 140.2, 137.7, 135.0, 132.5, 131.6, 131.4, 131.3, 130.7, 130.1, 128.6, 127.5, 126.2, 124.6, 124.2, 123.4, 122.1, 121.1(4), 121.0(5), 120.5, 83.5, 72.9, 72.8, 27.9, 17.5; IR (neat): 3401(br), 2923, 2852, 1728, 1708, 1683, 1632, 1598, 1470, 1458, 1304, 1115, 1038, 799, 707; HRMS (ESI) *m/z*: [M + H]<sup>+</sup> calcd for C<sub>30</sub>H<sub>28</sub>ClN<sub>2</sub>O<sub>4</sub> 515.1732, found 515.1729.

***tert*-butyl 11a-(2-bromobenzoyl)-4-methyl-11-oxo-5,5a,11,11a-tetrahydro-6H-benzo[6,7]azepino[2,3-*b*]quinoline-6-carboxylate (3p)**

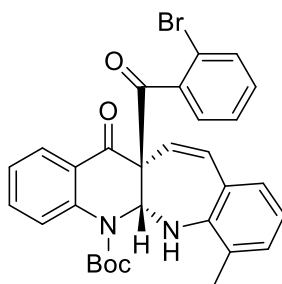

**3p**

The reaction was conducted with *tert*-butyl (2-(3-(2-bromophenyl)propioloyl)phenyl)carbamate (**1p**, 0.2 mmol, 80.0 mg), 8-methylquinoline *N*-oxide (**2a**, 0.4 mmol, 63.6 mg), 4Å molecular sieves (40 mg) and Cu(hfacac)<sub>2</sub> (0.04 mmol, 19.1 mg) in toluene (4.0 mL) at 120 °C (120 °C, heating mantle temperature). Purification by column chromatography on silica gel (petroleum ether/ethyl acetate = 5:1) yielded **3p** (55.8 mg, 50%) as a pale yellow oil.

<sup>1</sup>H NMR (400 MHz, CDCl<sub>3</sub>) δ 8.07 (d, *J* = 7.8 Hz, 1H), 8.00 – 7.94 (m, 3H), 7.53 – 7.50 (m, 2H), 7.40 – 7.36 (m, 2H), 7.20 – 7.15 (m, 2H), 7.02 (d, *J* = 7.3 Hz, 1H), 6.87 – 6.80 (m, 1H), 6.34 (s, 1H), 6.20 (d, *J* = 12.3 Hz, 1H), 3.97 (s, 1H), 2.12 (s, 3H), 1.19 (s, 9H); <sup>13</sup>C NMR (100 MHz, CDCl<sub>3</sub>) δ 195.0, 191.5, 151.1, 144.0, 139.2, 136.0, 134.4, 133.3, 132.5, 131.9, 130.2, 129.4, 128.6, 128.3, 124.6, 124.4, 123.0, 122.5, 121.4, 121.3, 120.9, 83.2, 72.4, 71.2, 27.7, 17.6; IR (neat): 3438(br), 2921, 2849, 1643, 1598, 1470, 1458, 1419, 1306, 1233, 1145, 1088, 1041, 848, 696; HRMS (ESI) *m/z*: [M + H]<sup>+</sup> calcd for C<sub>30</sub>H<sub>28</sub>BrN<sub>2</sub>O<sub>4</sub> 559.1227, found 559.1224.

*tert*-butyl 4-methyl-11a-(2-methylbenzoyl)-11-oxo-5,5a,11,11a-tetrahydro-6*H*-benzo[6,7]azepino[2,3-*b*]quinoline-6-carboxylate (**3q**)

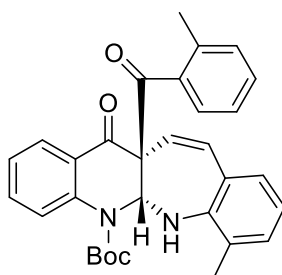

**3q**

The reaction was conducted with *tert*-butyl (2-(3-(*o*-tolyl)propioloyl)phenyl)carbamate (**1q**, 0.2 mmol, 67.0 mg), 8-methylquinoline *N*-oxide (**2a**, 0.4 mmol, 63.6 mg), 4Å molecular sieves (40 mg) and Cu(hfacac)<sub>2</sub> (0.04 mmol, 19.1 mg) in toluene (4.0 mL) at 120 °C (120 °C, heating mantle temperature). Purification by column chromatography on silica gel (petroleum ether/ethyl acetate = 5:1) yielded **3q** (76.2 mg, 77%) as a pale yellow oil.

<sup>1</sup>H NMR (400 MHz, CDCl<sub>3</sub>) δ 8.12 (d, *J* = 8.5 Hz, 1H), 8.06 (d, *J* = 6.2 Hz, 1H), 7.77 (d, *J* = 7.6 Hz, 1H), 7.53 (t, *J* = 7.8 Hz, 1H), 7.30 – 7.26 (m, 1H), 7.21 – 7.13 (m, 4H), 6.99 (d, *J* = 6.9 Hz, 1H), 6.85 – 6.79 (m, 2H), 6.16 (d, *J* = 12.3 Hz, 1H), 6.02 (s, 1H), 3.92 (s, 1H), 2.11 (s, 6H), 1.20 (s, 9H); <sup>13</sup>C NMR (100 MHz, CDCl<sub>3</sub>) δ 198.3, 190.6, 151.3, 144.4, 139.6, 138.1, 137.5, 134.8, 132.6, 132.0, 131.8, 131.1, 130.1, 128.7, 126.9, 125.1, 124.5, 124.1, 123.3, 122.7, 120.9, 120.3, 120.1, 83.3, 73.3, 72.5, 27.7, 20.0, 17.6; IR (neat): 3407(br), 2975, 2926, 2853, 1726, 1707, 1681, 1598, 1470, 1231, 1097, 1040, 1010, 953, 798; HRMS (ESI) *m/z*: [M + H]<sup>+</sup> calcd for C<sub>31</sub>H<sub>31</sub>N<sub>2</sub>O<sub>4</sub> 495.2278, found 495.2281.

***tert*-butyl 11a-(3,5-dimethylbenzoyl)-4-methyl-11-oxo-5,5a,11,11a-tetrahydro-6H-benzo[6,7]azepino[2,3-*b*]quinoline-6-carboxylate (3r)**

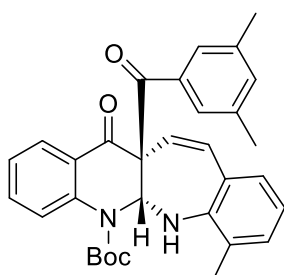

**3r**

The reaction was conducted with *tert*-butyl (2-(3-(3,5-dimethylphenyl)propioloyl)phenyl)carbamate (**1r**, 0.2 mmol, 69.8 mg), 8-methylquinoline *N*-oxide (**2a**, 0.4 mmol, 63.6 mg), 4Å molecular sieves (40 mg) and Cu(hfacac)<sub>2</sub> (0.04 mmol, 19.1 mg) in toluene (4.0 mL) at 120 °C (120 °C, heating mantle temperature). Purification by column chromatography on silica gel (petroleum

ether/ethyl acetate = 5:1) yielded **3r** (89.6 mg, 88%) as a yellow solid (mp 155-157 °C).

<sup>1</sup>H NMR (400 MHz, CDCl<sub>3</sub>) δ 8.07 – 7.97 (m, 2H), 7.59 – 7.49 (m, 3H), 7.20 – 7.15 (m, 3H), 7.02 (s, 1H), 6.88 – 6.80 (m, 2H), 6.32 (s, 1H), 6.21 (d, *J* = 12.3 Hz, 1H), 3.96 (s, 1H), 2.27 (s, 6H), 2.12 (s, 3H), 1.18 (s, 9H); <sup>13</sup>C NMR (100 MHz, CDCl<sub>3</sub>) δ 195.3, 191.6, 151.1, 144.1, 139.2, 138.2, 136.2, 134.9, 134.4, 132.3, 131.7, 130.1, 128.3, 127.0, 124.6, 124.3, 123.2, 123.0, 121.3, 121.2, 120.9, 82.9, 72.7, 71.3, 27.6, 21.2, 17.6; IR (neat): 3407(br), 2974, 2923, 2853, 1727, 1704, 1669, 1599, 1558, 1470, 1458, 1197, 1099, 851, 706; HRMS (ESI) *m/z*: [M + H]<sup>+</sup> calcd for C<sub>32</sub>H<sub>33</sub>N<sub>2</sub>O<sub>4</sub> 509.2435, found 509.2436.

***tert*-butyl 4-methyl-11-oxo-11a-(thiophene-3-carbonyl)-5,5a,11,11a-tetrahydro-6H-benzo[6,7]azepino[2,3-*b*]quinoline-6-carboxylate (3s)**

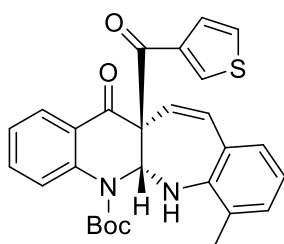

**3s**

The reaction was conducted with *tert*-butyl (2-(3-(thiophen-3-yl)propioloyl)phenyl)carbamate (**1s**, 0.2 mmol, 65.4 mg), 8-methylquinoline *N*-oxide (**2a**, 0.4 mmol, 63.6 mg), 4Å molecular sieves (40 mg) and Cu(hfacac)<sub>2</sub> (0.04 mmol, 19.1 mg) in toluene (4.0 mL) at 120 °C (120 °C, heating mantle temperature). Purification by column chromatography on silica gel (petroleum ether/ethyl acetate = 5:1) yielded **3s** (65.3 mg, 67%) as a pale yellow oil.

<sup>1</sup>H NMR (400 MHz, CDCl<sub>3</sub>) δ 8.33 (s, 1H), 8.06 (d, *J* = 5.4 Hz, 1H), 7.96 (d, *J* = 8.4 Hz, 1H), 7.57 – 7.51 (m, 2H), 7.19 – 7.13 (m, 2H), 7.02 (d, *J* = 5.0 Hz, 1H), 6.85 – 6.77 (m, 2H), 6.31 (s, 1H), 6.22 (d, *J* = 12.4 Hz, 1H), 3.96 (s, 1H), 2.13 (s, 3H), 1.30 (s, 9H); <sup>13</sup>C NMR (100 MHz, CDCl<sub>3</sub>) δ 192.0, 188.2, 151.4, 144.3, 139.5, 139.0,

134.6, 134.4, 132.6, 131.8, 130.2, 128.4, 128.2, 125.7, 124.7, 124.3, 123.1, 122.8, 121.7, 121.5, 120.9, 83.2, 72.7, 71.3, 27.8, 17.6; IR (neat): 3419(br), 2923, 2852, 1703, 1697, 1660, 1598, 1470, 1368, 1242, 1145, 1118, 1041, 911, 759; HRMS (ESI)  $m/z$ :  $[M + H]^+$  calcd for  $C_{28}H_{27}N_2O_4S$  487.1686, found 487.1686.

***tert*-butyl 11a-cinnamoyl-4-methyl-11-oxo-5,5a,11,11a-tetrahydro-6H-benzo[6,7]azepino[2,3-*b*]quinoline-6-carboxylate (3t)**

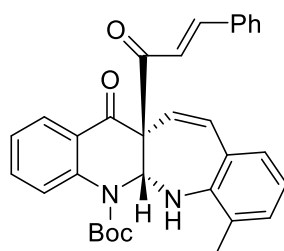

**3t**

The reaction was conducted with *tert*-butyl (*E*)-(2-(5-phenylpent-4-en-2-ynoyl)phenyl)carbamate (**1t**, 0.2 mmol, 69.4 mg), 8-methylquinoline *N*-oxide (**2a**, 0.4 mmol, 63.6 mg), 4Å molecular sieves (40 mg) and  $Cu(hfacac)_2$  (0.04 mmol, 19.1 mg) in toluene (4.0 mL) at 120 °C (120 °C, heating mantle temperature). Purification by column chromatography on silica gel (petroleum ether/ethyl acetate = 5:1) yielded **3t** (69.0 mg, 68%) as a pale yellow oil.

$^1H$  NMR (400 MHz,  $CDCl_3$ )  $\delta$  8.06 (d,  $J = 7.8$  Hz, 1H), 7.93 (d,  $J = 8.5$  Hz, 1H), 7.69 (d,  $J = 15.6$  Hz, 1H), 7.56 – 7.52 (m, 3H), 7.39 – 7.36 (m, 3H), 7.18 (t,  $J = 7.5$  Hz, 1H), 7.12 – 7.06 (m, 2H), 7.01 (d,  $J = 7.2$  Hz, 1H), 6.83 (t,  $J = 7.5$  Hz, 1H), 6.75 (d,  $J = 12.4$  Hz, 1H), 6.13 – 6.07 (m, 2H), 3.95 (s, 1H), 2.16 (s, 3H), 1.43 (s, 9H);  $^{13}C$  NMR (100 MHz,  $CDCl_3$ )  $\delta$  191.8, 191.2, 151.9, 145.8, 144.6, 140.1, 134.9, 134.1, 132.7, 131.5, 131.0, 130.0, 128.9, 128.8, 128.2, 124.6, 124.1, 123.4, 122.0, 121.4, 121.1, 120.8, 120.3, 83.3, 72.4, 72.1, 28.0, 17.6; IR (neat): 3445(br), 2922, 2850, 1673, 1632, 1599, 1576, 1470, 1458, 1304, 1227, 1124, 1041, 951, 732; HRMS (ESI)  $m/z$ :  $[M + H]^+$  calcd for  $C_{32}H_{31}N_2O_4$  507.2278, found 507.2279.

***tert*-butyl 4-methyl-11-oxo-11a-pentanoyl-5,5a,11,11a-tetrahydro-6*H*-benzo[6,7]azepino[2,3-*b*]quinoline-6-carboxylate (3u)**

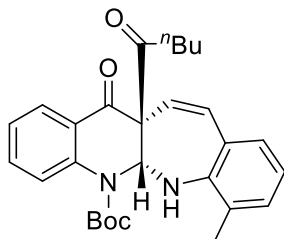

**3u**

The reaction was conducted with *tert*-butyl (2-(hept-2-ynoyl)phenyl)carbamate (**1u**, 0.2 mmol, 60.2 mg), 8-methylquinoline *N*-oxide (**2a**, 0.4 mmol, 63.6 mg), 4Å molecular sieves (40 mg) and Cu(hfacac)<sub>2</sub> (0.04 mmol, 19.1 mg) in toluene (4.0 mL) at 120 °C (120 °C, heating mantle temperature). Purification by column chromatography on silica gel (petroleum ether/ethyl acetate = 5:1) yielded **3u** (79.3 mg, 86%) as a pale yellow oil.

<sup>1</sup>H NMR (400 MHz, CDCl<sub>3</sub>) δ 8.04 (d, *J* = 7.8 Hz, 1H), 7.94 (d, *J* = 8.5 Hz, 1H), 7.55 (t, *J* = 7.9 Hz, 1H), 7.20 (t, *J* = 7.5 Hz, 1H), 7.08 (d, *J* = 7.7 Hz, 1H), 6.99 (d, *J* = 7.2 Hz, 1H), 6.81 (t, *J* = 7.5 Hz, 1H), 6.69 (d, *J* = 12.4 Hz, 1H), 6.06 – 6.00 (m, 2H), 3.87 (s, 1H), 2.73 – 2.65 (m, 1H), 2.49 – 2.41 (m, 1H), 2.14 (s, 3H), 1.49 – 1.42 (m, 11H), 1.26 – 1.19 (m, 2H), 0.83 (t, *J* = 7.3 Hz, 3H); <sup>13</sup>C NMR (100 MHz, CDCl<sub>3</sub>) δ 203.6, 191.9, 151.9, 144.7, 140.1, 134.9, 132.3, 131.4, 129.9, 128.1, 124.6, 124.2, 123.4, 122.0, 121.6, 121.1, 120.9, 83.4, 73.2, 72.5, 38.6, 28.0, 25.5, 22.0, 17.5, 13.8; IR (neat): 3407(br), 2959, 2927, 2853, 1715, 1684, 1630, 1598, 1470, 1303, 1228, 1121, 1041, 797, 519; HRMS (ESI) *m/z*: [M + H]<sup>+</sup> calcd for C<sub>28</sub>H<sub>33</sub>N<sub>2</sub>O<sub>4</sub> 461.2435, found 461.2434.

***tert*-butyl 11a-(cyclopropanecarbonyl)-4-methyl-11-oxo-5,5a,11,11a-tetrahydro-6*H*-benzo[6,7]azepino[2,3-*b*]quinoline-6-carboxylate (3v)**

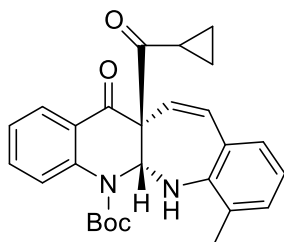

**3v**

The reaction was conducted with *tert*-butyl (2-(3-cyclopropylpropionyl)phenyl)carbamate (**1v**, 0.2 mmol, 57.0 mg), 8-methylquinoline *N*-oxide (**2a**, 0.4 mmol, 63.6 mg), 4Å molecular sieves (40 mg) and Cu(hfacac)<sub>2</sub> (0.04 mmol, 19.1 mg) in toluene (4.0 mL) at 120 °C (120 °C, heating mantle temperature). Purification by column chromatography on silica gel (petroleum ether/ethyl acetate = 5:1) yielded **3v** (71.2 mg, 80%) as a pale yellow oil.

<sup>1</sup>H NMR (400 MHz, CDCl<sub>3</sub>) δ 8.05 (d, *J* = 7.8 Hz, 1H), 7.91 (d, *J* = 8.3 Hz, 1H), 7.54 (t, *J* = 6.9 Hz, 1H), 7.19 (t, *J* = 6.6 Hz, 1H), 7.08 (d, *J* = 7.5 Hz, 1H), 6.99 (d, *J* = 7.2 Hz, 1H), 6.81 (t, *J* = 7.5 Hz, 1H), 6.73 (d, *J* = 12.5 Hz, 1H), 6.18 (d, *J* = 12.4 Hz, 1H), 6.08 (s, 1H), 3.90 (s, 1H), 2.30 – 2.24 (m, 1H), 2.14 (s, 3H), 1.49 (s, 9H), 1.01 – 0.87 (m, 4H); <sup>13</sup>C NMR (100 MHz, CDCl<sub>3</sub>) δ 203.5, 191.8, 151.9, 144.6, 140.1, 134.7, 132.3, 131.4, 129.9, 128.2, 124.6, 124.2, 123.5, 121.9, 121.8, 121.2, 120.9, 83.3, 73.1, 72.4, 28.1, 17.8, 17.5, 12.8, 12.7; IR (neat): 3419(br), 2978, 2920, 2849, 1704, 1697, 1681, 1657, 1645, 1599, 1417, 1228, 1041, 909, 797; HRMS (ESI) *m/z*: [M + H]<sup>+</sup> calcd for C<sub>27</sub>H<sub>29</sub>N<sub>2</sub>O<sub>4</sub> 445.2122, found 445.2123.

***tert*-butyl 11a-benzoyl-9-chloro-4-methyl-11-oxo-5,5a,11,11a-tetrahydro-6H-benzo[6,7]azepino[2,3-*b*]quinoline-6-carboxylate (3w)**

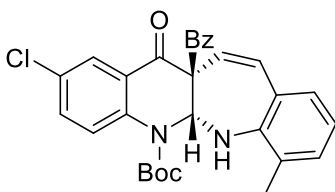

**3w**

The reaction was conducted with *tert*-butyl (4-chloro-2-(3-phenylpropionyl)phenyl)carbamate (**1w**, 0.2 mmol, 71.1 mg), 8-methylquinoline *N*-oxide (**2a**, 0.4 mmol, 63.6 mg), 4Å molecular sieves (40 mg) and Cu(hfacac)<sub>2</sub> (0.04 mmol, 19.1 mg) in toluene (4.0 mL) at 120 °C (120 °C, heating mantle temperature). Purification by column chromatography on silica gel (petroleum ether/ethyl acetate = 5:1) yielded **3w** (77.3 mg, 75%) as a pale yellow oil.

<sup>1</sup>H NMR (400 MHz, CDCl<sub>3</sub>) δ 8.03 – 7.93 (m, 4H), 7.54 – 7.39 (m, 4H), 7.17 (d, *J* = 7.0 Hz, 1H), 7.04 (d, *J* = 6.5 Hz, 1H), 6.88 – 6.81 (m, 2H), 6.34 (s, 1H), 6.17 (d, *J* = 11.9 Hz, 1H), 3.93 (s, 1H), 2.12 (s, 3H), 1.17 (s, 9H); <sup>13</sup>C NMR (100 MHz, CDCl<sub>3</sub>) δ 194.9, 190.3, 150.9, 143.7, 137.6, 135.7, 134.1, 133.5, 132.7, 132.1, 130.4, 130.1, 129.4, 128.7, 127.7, 124.6, 123.1, 122.9, 122.6, 122.1, 121.0, 83.6, 72.2, 71.0, 27.6, 17.6; IR (neat): 3446(br), 2978, 2921, 2850, 1867, 1708, 1667, 1646, 1596, 1507, 1417, 1395, 1147, 848, 690; HRMS (ESI) *m/z*: [M + H]<sup>+</sup> calcd for C<sub>30</sub>H<sub>28</sub>ClN<sub>2</sub>O<sub>4</sub> 515.1732, found 515.1735.

*tert*-butyl 11a-benzoyl-4,9-dimethyl-11-oxo-5,5a,11,11a-tetrahydro-6H-benzo[6,7]azepino[2,3-*b*]quinoline-6-carboxylate (**3x**)

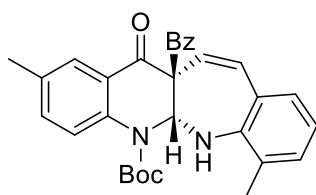

**3x**

The reaction was conducted with *tert*-butyl (4-methyl-2-(3-phenylpropionyl)phenyl)carbamate (**1x**, 0.2 mmol, 67.0 mg), 8-methylquinoline *N*-oxide (**2a**, 0.4 mmol, 63.6 mg), 4Å molecular sieves (40 mg) and Cu(hfacac)<sub>2</sub> (0.04 mmol, 19.1 mg) in toluene (4.0 mL) at 120 °C (120 °C, heating mantle temperature). Purification by column chromatography on silica gel (petroleum ether/ethyl acetate = 5:1) yielded **3x** (76.2 mg, 77%) as a pale yellow oil.



$^1\text{H}$  NMR (400 MHz,  $\text{CDCl}_3$ )  $\delta$  7.99 (d,  $J = 7.4$  Hz, 2H), 7.88 – 7.83 (m, 2H), 7.51 (t,  $J = 7.4$  Hz, 1H), 7.39 – 7.31 (m, 3H), 7.16 (d,  $J = 7.6$  Hz, 1H), 7.02 (d,  $J = 7.3$  Hz, 1H), 6.87 – 6.79 (m, 2H), 6.33 (s, 1H), 6.19 (d,  $J = 12.3$  Hz, 1H), 3.96 (s, 1H), 2.35 (s, 3H), 2.11 (s, 3H), 1.18 (s, 9H);  $^{13}\text{C}$  NMR (100 MHz,  $\text{CDCl}_3$ )  $\delta$  195.1, 191.7, 151.2, 144.1, 136.8, 136.0, 135.3, 134.2, 133.2, 132.4, 131.9, 130.2, 129.4, 128.6, 128.2, 124.6, 123.0, 122.7, 121.4, 121.1, 120.8, 82.9, 72.3, 71.2, 27.7, 20.5, 17.6; IR (neat): 3419(br), 2976, 2923, 2852, 1704, 1668, 1632, 1615, 1416, 1308, 1231, 1148, 1029, 970, 786; HRMS (ESI)  $m/z$ :  $[\text{M} + \text{H}]^+$  calcd for  $\text{C}_{31}\text{H}_{31}\text{N}_2\text{O}_4$  495.2278, found 495.2281.

***tert*-butyl 11a-benzoyl-8-bromo-4-methyl-11-oxo-5,5a,11,11a-tetrahydro-6*H*-benzo[6,7]azepino[2,3-*b*]quinoline-6-carboxylate (3y)**

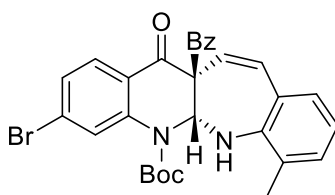

**3y**

The reaction was conducted with *tert*-butyl (5-bromo-2-(3-phenylpropionyl)phenyl)carbamate (**1y**, 0.2 mmol, 80.0 mg), 8-methylquinoline *N*-oxide (**2a**, 0.4 mmol, 63.6 mg), 4Å molecular sieves (40 mg) and  $\text{Cu}(\text{hfacac})_2$  (0.04 mmol, 19.1 mg) in toluene (4.0 mL) at 120 °C (120 °C, heating mantle temperature). Purification by column chromatography on silica gel (petroleum ether/ethyl acetate = 5:1) yielded **3y** (87.2 mg, 78%) as a pale yellow oil.

$^1\text{H}$  NMR (400 MHz,  $\text{CDCl}_3$ )  $\delta$  8.23 (s, 1H), 7.98 (d,  $J = 7.2$  Hz, 2H), 7.93 (d,  $J = 8.4$  Hz, 1H), 7.53 (t,  $J = 6.4$  Hz, 1H), 7.41 – 7.34 (m, 3H), 7.17 (d,  $J = 6.5$  Hz, 1H), 7.04 (d,  $J = 5.9$  Hz, 1H), 6.89 – 6.81 (m, 2H), 6.32 (s, 1H), 6.17 (d,  $J = 12.3$  Hz, 1H), 3.95 (s, 1H), 2.14 (s, 3H), 1.19 (s, 9H);  $^{13}\text{C}$  NMR (100 MHz,  $\text{CDCl}_3$ )  $\delta$  194.8, 190.6, 150.8, 143.8, 139.9, 135.8, 133.5, 132.7, 132.0, 130.4, 129.6, 129.4, 129.3, 128.7, 127.7, 124.7, 124.2, 123.0, 122.0, 121.0, 120.0, 83.8, 72.4, 70.9, 27.6, 17.7; IR (neat):

3401(br), 2975, 2922, 2850, 1727, 1705, 1669, 1645, 1588, 1256, 1144, 1119, 1042, 937, 707; HRMS (ESI)  $m/z$ :  $[M + H]^+$  calcd for  $C_{30}H_{28}BrN_2O_4$  559.1227, found 559.1232.

*tert*-butyl 11a-benzoyl-4,8-dimethyl-11-oxo-5,5a,11,11a-tetrahydro-6*H*-benzo[6,7]azepino[2,3-*b*]quinoline-6-carboxylate (**3z**)

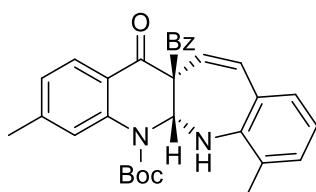

**3z**

The reaction was conducted with *tert*-butyl (5-methyl-2-(3-phenylpropioloyl)phenyl)carbamate (**1z**, 0.2 mmol, 67.0 mg), 8-methylquinoline *N*-oxide (**2a**, 0.4 mmol, 63.6 mg), 4Å molecular sieves (40 mg) and  $Cu(hfacac)_2$  (0.04 mmol, 19.1 mg) in toluene (4.0 mL) at 120 °C (120 °C, heating mantle temperature). Purification by column chromatography on silica gel (petroleum ether/ethyl acetate = 4:1) yielded **3z** (81.2 mg, 82%) as a pale yellow oil.

$^1H$  NMR (400 MHz,  $CDCl_3$ )  $\delta$  8.00 – 7.95 (m, 3H), 7.81 (s, 1H), 7.56 – 7.49 (m, 1H), 7.39 – 7.36 (m, 2H), 7.16 (d,  $J = 6.2$  Hz, 1H), 7.02 (d,  $J = 7.1$  Hz, 2H), 6.87 – 6.79 (m, 2H), 6.31 (s, 1H), 6.20 (d,  $J = 12.4$  Hz, 1H), 3.96 (s, 1H), 2.40 (s, 3H), 2.13 (s, 3H), 1.19 (s, 9H);  $^{13}C$  NMR (100 MHz,  $CDCl_3$ )  $\delta$  194.9, 191.3, 151.2, 145.7, 144.1, 139.2, 136.1, 133.2, 132.4, 131.9, 130.2, 129.3, 128.6, 128.3, 125.5, 124.6, 123.1, 122.7, 121.5, 120.8, 119.0, 83.0, 72.6, 71.1, 27.7, 22.3, 17.7; IR (neat): 3411(br), 2975, 2922, 2850, 1725, 1698, 1668, 1645, 1607, 1471, 1301, 1233, 1098, 955, 802; HRMS (ESI)  $m/z$ :  $[M + H]^+$  calcd for  $C_{31}H_{31}N_2O_4$  495.2278, found 495.2281.

*tert*-butyl 11a-benzoyl-11-oxo-5,5a,11,11a-tetrahydro-6*H*-benzo[6,7]azepino[2,3-*b*]quinoline-6-carboxylate (**3aa**)

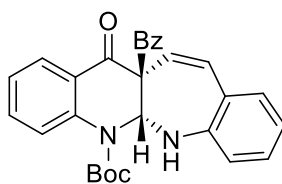

**3aa**

The reaction was conducted with *tert*-butyl (2-(3-phenylpropioloyl)phenyl)carbamate (**1a**, 0.2 mmol, 64.2 mg), quinoline *N*-oxide (**2b**, 0.4 mmol, 58.0 mg), 4Å molecular sieves (40 mg) and Cu(hfacac)<sub>2</sub> (0.04 mmol, 19.1 mg) in toluene (4.0 mL) at 120 °C (120 °C, heating mantle temperature). Purification by column chromatography on silica gel (petroleum ether/ethyl acetate = 4:1) yielded **3aa** (62.6 mg, 67%) as a pale yellow oil.

<sup>1</sup>H NMR (400 MHz, CDCl<sub>3</sub>) δ 8.07 (d, *J* = 6.2 Hz, 1H), 8.01 (d, *J* = 7.3 Hz, 2H), 7.83 (d, *J* = 8.4 Hz, 1H), 7.55 – 7.48 (m, 2H), 7.41 – 7.38 (m, 2H), 7.21 (t, *J* = 7.5 Hz, 1H), 7.09 (t, *J* = 7.6 Hz, 1H), 6.92 (t, *J* = 7.5 Hz, 1H), 6.80 (d, *J* = 12.4 Hz, 1H), 6.67 (d, *J* = 7.9 Hz, 1H), 6.44 (s, 1H), 6.17 (d, *J* = 12.3 Hz, 1H), 4.01 (s, 1H), 1.19 (s, 9H); <sup>13</sup>C NMR (100 MHz, CDCl<sub>3</sub>) δ 195.1, 191.4, 151.1, 145.1, 139.0, 135.6, 134.0, 133.7, 133.4, 132.0, 129.5, 128.9, 128.6, 128.2, 124.6, 122.9, 122.6, 122.1, 121.7, 121.1, 118.5, 83.3, 71.3, 71.2, 27.7; IR (neat): 3434(br), 2978, 2919, 2849, 1698, 1666, 1599, 1476, 1459, 1369, 1259, 1145, 1041, 903, 749; HRMS (ESI) *m/z*: [M + H]<sup>+</sup> calcd for C<sub>29</sub>H<sub>27</sub>N<sub>2</sub>O<sub>4</sub> 467.1965, found 467.1968.

*tert*-butyl **11a-benzoyl-4-ethyl-11-oxo-5,5a,11,11a-tetrahydro-6H-benzo[6,7]azepino[2,3-*b*]quinoline-6-carboxylate (3ab)**

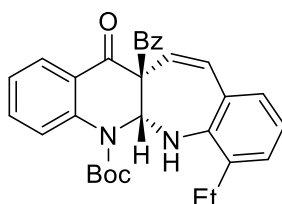

**3ab**

The reaction was conducted with *tert*-butyl (2-(3-phenylpropioloyl)phenyl)carbamate (**1a**, 0.2 mmol, 64.2 mg), 8-ethylquinoline *N*-oxide (**2c**, 0.4 mmol, 69.2 mg), 4Å molecular sieves (40 mg) and Cu(hfacac)<sub>2</sub> (0.04 mmol, 19.1 mg) in toluene (4.0 mL) at 120 °C (120 °C, heating mantle temperature). Purification by column chromatography on silica gel (petroleum ether/ethyl acetate = 5:1) yielded **3ab** (83.2 mg, 84%) as a pale yellow oil.

<sup>1</sup>H NMR (400 MHz, CDCl<sub>3</sub>) δ 8.09 (d, *J* = 7.7 Hz, 1H), 8.02 (d, *J* = 7.4 Hz, 2H), 7.93 (d, *J* = 8.4 Hz, 1H), 7.54 – 7.51 (m, 2H), 7.39 (d, *J* = 7.5 Hz, 2H), 7.23 – 7.16 (m, 2H), 7.03 (d, *J* = 7.2 Hz, 1H), 6.90 (t, *J* = 7.5 Hz, 1H), 6.82 (d, *J* = 12.4 Hz, 1H), 6.37 (s, 1H), 6.22 (d, *J* = 12.4 Hz, 1H), 4.04 (s, 1H), 2.50 – 2.38 (m, 2H), 1.17 – 1.12 (m, 12H); <sup>13</sup>C NMR (100 MHz, CDCl<sub>3</sub>) δ 195.0, 191.6, 151.1, 143.5, 139.1, 135.9, 134.3, 133.4, 132.5, 131.9, 130.6, 129.5, 128.6, 128.5, 128.3, 124.5, 123.5, 122.7, 121.8, 121.5, 121.1, 83.2, 72.2, 71.3, 27.6, 24.3, 13.5; IR (neat): 3419(br), 2920, 2849, 1702, 1644, 1597, 1458, 1419, 1307, 1256, 1144, 1119, 1041, 919, 703; HRMS (ESI) *m/z*: [M + H]<sup>+</sup> calcd for C<sub>31</sub>H<sub>31</sub>N<sub>2</sub>O<sub>4</sub> 495.2278, found 495.2276.

*tert*-butyl **11a-benzoyl-4-isopropyl-11-oxo-5,5a,11,11a-tetrahydro-6H-benzo[6,7]azepino[2,3-*b*]quinoline-6-carboxylate (3ac)**

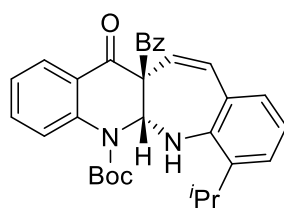

**3ac**

The reaction was conducted with *tert*-butyl (2-(3-phenylpropioloyl)phenyl)carbamate (**1a**, 0.2 mmol, 64.2 mg), 8-isopropylquinoline *N*-oxide (**2d**, 0.4 mmol, 74.8 mg), 4Å molecular sieves (40 mg) and Cu(hfacac)<sub>2</sub> (0.04 mmol, 19.1 mg) in toluene (4.0 mL) at 120 °C (120 °C, heating mantle temperature). Purification by column

chromatography on silica gel (petroleum ether/ethyl acetate = 10:1) yielded **3ac** (63.1 mg, 62%) as a yellow solid (mp 174-176 °C).

<sup>1</sup>H NMR (400 MHz, CDCl<sub>3</sub>) δ 8.10 (d, *J* = 7.8 Hz, 1H), 8.03 (d, *J* = 7.5 Hz, 2H), 7.94 (d, *J* = 8.4 Hz, 1H), 7.55 – 7.51 (m, 2H), 7.41 – 7.37 (m, 2H), 7.22 (t, *J* = 8.0 Hz, 1H), 7.16 (d, *J* = 7.6 Hz, 1H), 7.11 (d, *J* = 7.6 Hz, 1H), 6.94 (t, *J* = 7.6 Hz, 1H), 6.82 (d, *J* = 12.3 Hz, 1H), 6.38 (s, 1H), 6.24 (d, *J* = 12.4 Hz, 1H), 4.15 (s, 1H), 2.78 – 2.71 (m, 1H), 1.22 (d, *J* = 6.7 Hz, 3H), 1.16 (s, 9H), 1.12 (d, *J* = 6.6 Hz, 3H); <sup>13</sup>C NMR (100 MHz, CDCl<sub>3</sub>) δ 195.0, 191.6, 151.0, 143.0, 139.1, 135.9, 135.1, 134.3, 133.4, 132.5, 131.5, 129.5, 128.6, 128.3, 125.3, 124.6, 123.8, 122.9, 121.9, 121.6, 121.3, 83.1, 72.4, 71.5, 27.7, 27.6, 22.9, 22.0; IR (neat): 3445(br), 2978, 2923, 2849, 1922, 1867, 1828, 1799, 1790, 1779, 1660, 1457, 1041, 953, 749; HRMS (ESI) *m/z*: [M + H]<sup>+</sup> calcd for C<sub>32</sub>H<sub>33</sub>N<sub>2</sub>O<sub>4</sub> 509.2435, found 509.2437.

*tert*-butyl **11a-benzoyl-3-chloro-11-oxo-5,5a,11,11a-tetrahydro-6H-benzo[6,7]azepino[2,3-*b*]quinoline-6-carboxylate (3ad)**

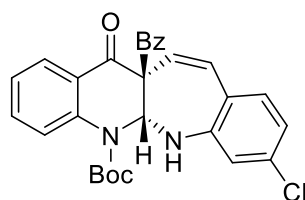

**3ad**

The reaction was conducted with *tert*-butyl (2-(3-phenylpropioloyl)phenyl)carbamate (**1a**, 0.2 mmol, 64.2 mg), 7-chloroquinoline *N*-oxide (**2e**, 0.4 mmol, 72.0 mg), 4Å molecular sieves (40 mg) and Cu(hfacac)<sub>2</sub> (0.04 mmol, 19.1 mg) in toluene (4.0 mL) at 120 °C (120 °C, heating mantle temperature). Purification by column chromatography on silica gel (petroleum ether/ethyl acetate = 10:1) yielded **3ad** (95.2 mg, 95%) as a pale yellow oil.

<sup>1</sup>H NMR (400 MHz, CDCl<sub>3</sub>) δ 8.05 (d, *J* = 7.8 Hz, 1H), 7.98 (d, *J* = 7.9 Hz, 2H), 7.79 (d, *J* = 8.5 Hz, 1H), 7.56 – 7.48 (m, 2H), 7.42 – 7.38 (m, 2H), 7.22 – 7.16 (m, 2H), 6.88 (d, *J* = 8.3 Hz, 1H), 6.73 (d, *J* = 12.3 Hz, 1H), 6.68 (s, 1H), 6.43 (s, 1H), 6.16 (d,

$J = 12.3$  Hz, 1H), 4.07 (s, 1H), 1.22 (s, 9H);  $^{13}\text{C}$  NMR (100 MHz,  $\text{CDCl}_3$ )  $\delta$  194.7, 191.2, 151.1, 145.9, 138.8, 135.5, 134.7, 134.3, 134.2, 133.5, 131.0, 129.5, 128.7, 128.2, 124.7, 123.2, 122.2, 121.5, 121.1(4), 121.0(7), 118.1, 83.5, 71.1, 71.0, 27.7; IR (neat): 3445(br), 2064, 1867, 1828, 1790, 1703, 1687, 1639, 1558, 1458, 1368, 1236, 1041, 588, 469; HRMS (ESI)  $m/z$ :  $[\text{M} + \text{H}]^+$  calcd for  $\text{C}_{29}\text{H}_{26}\text{ClN}_2\text{O}_4$  501.1576, found 501.1583.

***tert*-butyl 11a-benzoyl-11-oxo-3-(trifluoromethyl)-5,5a,11,11a-tetrahydro-6*H*-benzo[6,7]azepino[2,3-*b*]quinoline-6-carboxylate (3ae)**

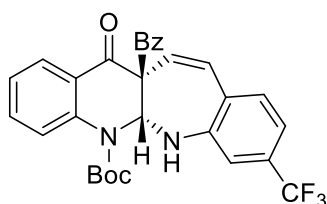

**3ae**

The reaction was conducted with *tert*-butyl (2-(3-phenylpropionoyl)phenyl)carbamate (**1a**, 0.2 mmol, 64.2 mg), 7-(trifluoromethyl)quinoline *N*-oxide (**2f**, 0.4 mmol, 63.6 mg), 4Å molecular sieves (40 mg) and  $\text{Cu}(\text{hfacac})_2$  (0.04 mmol, 19.1 mg) in toluene (4.0 mL) at 120 °C (120 °C, heating mantle temperature). Purification by column chromatography on silica gel (petroleum ether/ethyl acetate = 10:1) yielded **3ae** (85.2 mg, 87%) as a pale yellow oil.

$^1\text{H}$  NMR (400 MHz,  $\text{CDCl}_3$ )  $\delta$  8.06 (d,  $J = 5.3$  Hz, 1H), 7.98 (d,  $J = 6.7$  Hz, 2H), 7.80 (d,  $J = 7.9$  Hz, 1H), 7.57 – 7.50 (m, 2H), 7.43 – 7.36 (m, 3H), 7.23 – 7.14 (m, 2H), 6.94 (s, 1H), 6.82 (d,  $J = 12.4$  Hz, 1H), 6.45 (s, 1H), 6.30 (d,  $J = 12.3$  Hz, 1H), 4.23 (s, 1H), 1.23 (s, 9H);  $^{13}\text{C}$  NMR (100 MHz,  $\text{CDCl}_3$ )  $\delta$  194.5, 191.1, 151.1, 145.0, 138.8, 135.4, 134.3, 134.1, 133.6, 130.9, 129.4, 128.7, 128.2, 125.6, 125.3, 124.8, 122.2, 121.4, 117.5 (q,  $J = 6.9$  Hz), 115.3(4), 115.3(1), 83.6, 71.1(1), 71.0(7), 27.7; IR (neat): 3445(br), 2065, 1639, 1474, 1459, 1422, 1396, 1369, 1320, 1238, 1146, 1119, 1012,

508, 481; HRMS (ESI)  $m/z$ :  $[M + H]^+$  calcd for  $C_{30}H_{26}F_3N_2O_4$  535.1839, found 535.1843.

*tert*-butyl                      11a-benzoyl-3-methyl-11-oxo-5,5a,11,11a-tetrahydro-6*H*-benzo[6,7]azepino[2,3-*b*]quinoline-6-carboxylate (**3af**)

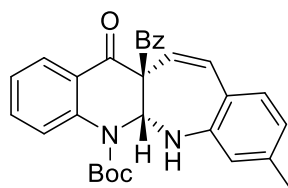

**3af**

The reaction was conducted with *tert*-butyl (2-(3-phenylpropioloyl)phenyl)carbamate (**1a**, 0.2 mmol, 64.2 mg), 7-methylquinoline *N*-oxide (**2g**, 0.4 mmol, 63.6 mg), 4Å molecular sieves (40 mg) and  $Cu(hfacac)_2$  (0.04 mmol, 19.1 mg) in toluene (4.0 mL) at 120 °C (120 °C, heating mantle temperature). Purification by column chromatography on silica gel (petroleum ether/ethyl acetate = 10:1) yielded **3af** (89.5 mg, 93%) as a pale yellow oil.

$^1H$  NMR (400 MHz,  $CDCl_3$ )  $\delta$  8.09 – 8.02 (m, 3H), 7.81 (d,  $J = 6.7$  Hz, 1H), 7.54 – 7.49 (m, 2H), 7.40 – 7.37 (m, 2H), 7.19 – 7.13 (m, 2H), 6.73 (d,  $J = 7.6$  Hz, 2H), 6.48 (d,  $J = 7.8$  Hz, 2H), 6.12 (s, 1H), 3.98 (s, 1H), 2.22 (s, 3H), 1.19 (s, 9H);  $^{13}C$  NMR (100 MHz,  $CDCl_3$ )  $\delta$  195.2, 191.3, 151.1, 144.9, 139.1, 138.9, 135.6, 133.9, 133.6, 133.4, 131.8, 129.6, 128.6, 128.1, 124.5, 122.2, 122.0, 121.9, 121.5, 120.0, 119.0, 83.2, 71.2, 71.1, 27.7, 21.0; IR (neat): 3445(br), 2978, 2925, 2854, 1703, 1698, 1668, 1646, 1615, 1599, 1579, 1558, 1146, 941, 814; HRMS (ESI)  $m/z$ :  $[M + H]^+$  calcd for  $C_{30}H_{29}N_2O_4$  481.2122, found 481.2126.

*tert*-butyl                      11a-benzoyl-2-fluoro-11-oxo-5,5a,11,11a-tetrahydro-6*H*-benzo[6,7]azepino[2,3-*b*]quinoline-6-carboxylate (**3ag**)

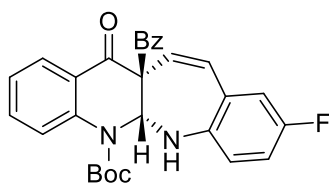

**3ag**

The reaction was conducted with *tert*-butyl (2-(3-phenylpropionyl)phenyl)carbamate (**1a**, 0.2 mmol, 64.2 mg), 6-fluoroquinoline *N*-oxide (**2h**, 0.4 mmol, 65.2 mg), 4Å molecular sieves (40 mg) and Cu(hfacac)<sub>2</sub> (0.04 mmol, 19.1 mg) in toluene (4.0 mL) at 120 °C (120 °C, heating mantle temperature). Purification by column chromatography on silica gel (petroleum ether/ethyl acetate = 10:1) yielded **3ag** (95.1 mg, 98%) as a pale yellow oil.

<sup>1</sup>H NMR (400 MHz, CDCl<sub>3</sub>) δ 8.07 (d, *J* = 6.3 Hz, 1H), 7.98 (d, *J* = 7.5 Hz, 2H), 7.83 (d, *J* = 8.5 Hz, 1H), 7.54 – 7.49 (m, 2H), 7.42 – 7.38 (m, 2H), 7.21 (t, *J* = 7.5 Hz, 1H), 6.99 – 6.96 (m, 1H), 6.84 – 6.79 (m, 1H), 6.71 (d, *J* = 12.4 Hz, 1H), 6.64 – 6.61 (m, 1H), 6.38 (s, 1H), 6.26 (d, *J* = 12.3 Hz, 1H), 3.92 (s, 1H), 1.20 (s, 9H); <sup>13</sup>C NMR (100 MHz, CDCl<sub>3</sub>) δ 194.8, 191.3, 157.6 (d, *J* = 238.0 Hz), 151.1, 141.5, 139.0, 135.6, 134.2, 133.5, 130.8, 129.4, 128.7, 128.2, 124.7 (d, *J* = 27.0 Hz), 124.0 (d, *J* = 7.0 Hz), 122.1, 121.5, 119.7 (d, *J* = 8.0 Hz), 118.8 (d, *J* = 22.0 Hz), 115.8 (d, *J* = 22.0 Hz), 83.4, 71.6, 71.2, 27.7; IR (neat): 3445(br), 2921, 2849, 2088, 1656, 1644, 1634, 1498, 1458, 1417, 1313, 1118, 1021, 959, 763; HRMS (ESI) *m/z*: [M + H]<sup>+</sup> calcd for C<sub>29</sub>H<sub>26</sub>FN<sub>2</sub>O<sub>4</sub> 485.1871, found 485.1877.

*tert*-butyl **11a-benzoyl-2-chloro-11-oxo-5,5a,11,11a-tetrahydro-6*H*-benzo[6,7]azepino[2,3-*b*]quinoline-6-carboxylate (3ah)**

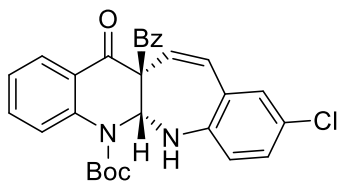

**3ah**



The reaction was conducted with *tert*-butyl (2-(3-phenylpropioloyl)phenyl)carbamate (**1a**, 0.2 mmol, 64.2 mg), 6-chloroquinoline *N*-oxide (**2i**, 0.4 mmol, 72.0 mg), 4Å molecular sieves (40 mg) and Cu(hfacac)<sub>2</sub> (0.04 mmol, 19.1 mg) in toluene (4.0 mL) at 120 °C (120 °C, heating mantle temperature). Purification by column chromatography on silica gel (petroleum ether/ethyl acetate = 10:1) yielded **3ah** (58.1 mg, 58%) as a pale yellow oil.

<sup>1</sup>H NMR (400 MHz, CDCl<sub>3</sub>) δ 8.06 (d, *J* = 7.7 Hz, 1H), 7.98 (d, *J* = 6.9 Hz, 2H), 7.82 (d, *J* = 10.0 Hz, 1H), 7.56 – 7.51 (m, 2H), 7.42 – 7.39 (m, 2H), 7.24 – 7.19 (m, 2H), 7.03 (d, *J* = 8.4 Hz, 1H), 6.70 (d, *J* = 12.4 Hz, 1H), 6.61 (d, *J* = 8.5 Hz, 1H), 6.40 (s, 1H), 6.23 (d, *J* = 9.9 Hz, 1H), 4.05 (s, 1H), 1.21 (s, 9H); <sup>13</sup>C NMR (100 MHz, CDCl<sub>3</sub>) δ 194.7, 191.2, 151.1, 143.7, 138.9, 135.5, 134.2, 133.6, 132.6, 130.7, 129.4, 128.7, 128.6, 128.2, 125.9, 124.6(4), 124.5(9), 124.0, 122.1, 121.5, 119.8, 83.4, 71.3, 71.1, 27.7; IR (neat): 3434(br), 2979, 2924, 2851, 2366, 1693, 1666, 1636, 1597, 1507, 1487, 1313, 1041, 855, 762; HRMS (ESI) *m/z*: [M + H]<sup>+</sup> calcd for C<sub>29</sub>H<sub>26</sub>ClN<sub>2</sub>O<sub>4</sub> 501.1576, found 501.1583.

*tert*-butyl **11a-benzoyl-2-bromo-11-oxo-5,5a,11,11a-tetrahydro-6H-benzo[6,7]azepino[2,3-*b*]quinoline-6-carboxylate (3ai)**

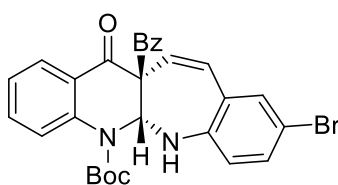

**3ai**

The reaction was conducted with *tert*-butyl (2-(3-phenylpropioloyl)phenyl)carbamate (**1a**, 0.2 mmol, 64.2 mg), 6-bromoquinoline *N*-oxide (**2j**, 0.4 mmol, 89.6 mg), 4Å molecular sieves (40 mg) and Cu(hfacac)<sub>2</sub> (0.04 mmol, 19.1 mg) in toluene (4.0 mL) at 120 °C (120 °C, heating mantle temperature). Purification by column chromatography on silica gel (petroleum ether/ethyl acetate = 10:1) yielded **3ai** (84.0 mg, 77%) as a pale yellow oil.

$^1\text{H}$  NMR (400 MHz,  $\text{CDCl}_3$ )  $\delta$  8.07 (s, 1H), 7.98 (d,  $J = 7.5$  Hz, 2H), 7.83 (d,  $J = 7.5$  Hz, 1H), 7.56 – 7.50 (m, 2H), 7.42 – 7.38 (m, 3H), 7.20 – 7.14 (m, 2H), 6.68 (d,  $J = 8.0$  Hz, 1H), 6.55 (d,  $J = 8.4$  Hz, 1H), 6.41 (s, 1H), 6.23 (d,  $J = 8.4$  Hz, 1H), 4.10 (s, 1H), 1.20 (s, 9H);  $^{13}\text{C}$  NMR (100 MHz,  $\text{CDCl}_3$ )  $\delta$  194.7, 191.2, 151.1, 144.2, 138.9, 135.6, 135.5, 134.2, 133.6, 131.4, 130.6, 129.4, 128.7, 128.2, 124.7, 124.6, 124.4, 122.1, 121.4, 120.1, 113.1, 83.4, 71.2, 71.0, 27.7; IR (neat): 3445(br), 2924, 2851, 2065, 1657, 1644, 1634, 1558, 1507, 1459, 1422, 1311, 1117, 947, 755; HRMS (ESI)  $m/z$ :  $[\text{M} + \text{H}]^+$  calcd for  $\text{C}_{29}\text{H}_{26}\text{BrN}_2\text{O}_4$  545.1070, found 545.1080.

**6-(*tert*-butyl) 2-methyl 11a-benzoyl-11-oxo-5,5a,11,11a-tetrahydro-6H-benzo[6,7]azepino[2,3-*b*]quinoline-2,6-dicarboxylate (3aj)**

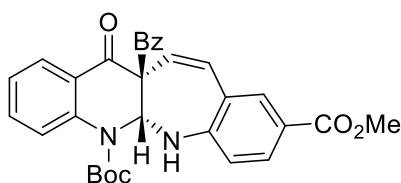

**3aj**

The reaction was conducted with *tert*-butyl (2-(3-phenylpropionyl)phenyl)carbamate (**1a**, 0.2 mmol, 64.2 mg), 6-(methoxycarbonyl)quinoline *N*-oxide (**2k**, 0.4 mmol, 81.2 mg), 4Å molecular sieves (40 mg) and  $\text{Cu}(\text{hfacac})_2$  (0.04 mmol, 19.1 mg) in toluene (4.0 mL) at 120 °C (120 °C, heating mantle temperature). Purification by column chromatography on silica gel (petroleum ether/ethyl acetate = 10:1) yielded **3aj** (94.5 mg, 90%) as a pale yellow oil.

$^1\text{H}$  NMR (400 MHz,  $\text{CDCl}_3$ )  $\delta$  8.05 – 7.99 (m, 4H), 7.84 (d,  $J = 7.0$  Hz, 1H), 7.75 (s, 1H), 7.55 – 7.41 (m, 4H), 7.20 (s, 1H), 6.83 (d,  $J = 9.4$  Hz, 1H), 6.67 (s, 1H), 6.49 (s, 1H), 6.21 (d,  $J = 10.0$  Hz, 1H), 4.50 (s, 1H), 3.91 (s, 3H), 1.21 (s, 9H);  $^{13}\text{C}$  NMR (100 MHz,  $\text{CDCl}_3$ )  $\delta$  194.4, 191.0, 166.4, 151.0, 148.9, 138.8, 135.8, 135.4, 134.3, 133.6, 131.5, 130.1, 129.5, 128.7, 128.2, 124.7, 123.4, 122.5, 122.1, 121.5, 121.4, 118.2, 83.5, 70.9, 70.8, 51.9, 27.7; IR (neat): 3445(br), 2980, 2927, 2852, 1698, 1668, 1645,

1600, 1506, 1477, 1370, 1234, 1011, 942, 708; HRMS (ESI) m/z: [M + H]<sup>+</sup> calcd for C<sub>31</sub>H<sub>29</sub>N<sub>2</sub>O<sub>6</sub> 525.2020, found 525.2029.

*tert*-butyl                      11a-benzoyl-2-nitro-11-oxo-5,5a,11,11a-tetrahydro-6*H*-benzo[6,7]azepino[2,3-*b*]quinoline-6-carboxylate (**3ak**)

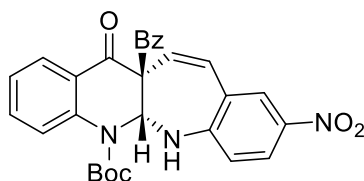

**3ak**

The reaction was conducted with *tert*-butyl (2-(3-phenylpropionyl)phenyl)carbamate (**1a**, 0.2 mmol, 64.2 mg), 6-nitroquinoline *N*-oxide (**2l**, 0.4 mmol, 76.0 mg), 4Å molecular sieves (40 mg) and Cu(hfacac)<sub>2</sub> (0.04 mmol, 19.1 mg) in toluene (4.0 mL) at 120 °C (120 °C, heating mantle temperature). Purification by column chromatography on silica gel (petroleum ether/ethyl acetate = 10:1) yielded **3ak** (80.9 mg, 79%) as a pale yellow oil.

<sup>1</sup>H NMR (400 MHz, CDCl<sub>3</sub>) δ 8.18 (s, 1H), 8.04 (d, *J* = 6.2 Hz, 1H), 7.98 (d, *J* = 7.0 Hz, 2H), 7.92 (d, *J* = 8.3 Hz, 1H), 7.82 (d, *J* = 7.5 Hz, 1H), 7.57 – 7.43 (m, 4H), 7.21 (s, 1H), 6.83 (d, *J* = 11.6 Hz, 1H), 6.68 (d, *J* = 8.1 Hz, 1H), 6.52 (s, 1H), 6.29 (d, *J* = 11.9 Hz, 1H), 4.74 (s, 1H), 1.25 (s, 9H); <sup>13</sup>C NMR (100 MHz, CDCl<sub>3</sub>) δ 193.8, 190.6, 151.0, 150.0, 141.1, 138.6, 135.1, 134.5, 133.8, 130.6, 129.7, 129.4, 128.8, 128.3, 125.1, 124.9, 124.2, 122.2, 121.2(2), 121.1(5), 118.3, 84.0, 70.7, 70.5, 27.7; IR (neat): 3445(br), 2925, 2851, 2107, 1073, 1657, 1634, 1614, 1558, 1532, 1476, 1258, 1041, 747, 489; HRMS (ESI) m/z: [M + H]<sup>+</sup> calcd for C<sub>29</sub>H<sub>26</sub>N<sub>3</sub>O<sub>6</sub> 512.1816, found 512.1826.

*tert*-butyl                      11a-benzoyl-2-methyl-11-oxo-5,5a,11,11a-tetrahydro-6*H*-benzo[6,7]azepino[2,3-*b*]quinoline-6-carboxylate (**3al**)

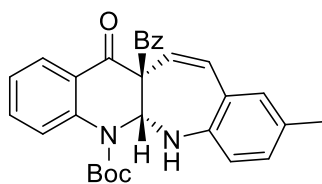

**3al**

The reaction was conducted with *tert*-butyl (2-(3-phenylpropioloyl)phenyl)carbamate (**1a**, 0.2 mmol, 64.2 mg), 6-methylquinoline *N*-oxide (**2m**, 0.4 mmol, 63.6 mg), 4Å molecular sieves (40 mg) and Cu(hfacac)<sub>2</sub> (0.04 mmol, 19.1 mg) in toluene (4.0 mL) at 120 °C (120 °C, heating mantle temperature). Purification by column chromatography on silica gel (petroleum ether/ethyl acetate = 4:1) yielded **3al** (92.4 mg, 96%) as a pale yellow oil.

<sup>1</sup>H NMR (400 MHz, CDCl<sub>3</sub>) δ 8.07 – 8.00 (m, 3H), 7.81 (d, *J* = 4.5 Hz, 1H), 7.53 – 7.50 (m, 2H), 7.40 – 7.38 (m, 2H), 7.22 – 7.19 (m, 1H), 7.06 (s, 1H), 6.89 (d, *J* = 5.4 Hz, 1H), 6.74 (d, *J* = 8.9 Hz, 1H), 6.57 (d, *J* = 3.4 Hz, 1H), 6.41 (s, 1H), 6.15 (d, *J* = 7.7 Hz, 1H), 3.92 (s, 1H), 2.28 (s, 3H), 1.18 (s, 9H); <sup>13</sup>C NMR (100 MHz, CDCl<sub>3</sub>) δ 195.3, 191.5, 151.1, 142.8, 139.0, 135.7, 134.0, 133.8, 133.4, 132.0, 130.3, 129.7, 129.6, 128.6, 128.1, 124.5, 122.9, 122.6, 122.2, 121.8, 118.6, 83.2, 71.4, 71.2, 27.7, 20.3; IR (neat): 3445(br), 2923, 2852, 2065, 1697, 1660, 1643, 1600, 1505, 1476, 1313, 1147, 1010, 947, 764; HRMS (ESI) *m/z*: [M + H]<sup>+</sup> calcd for C<sub>30</sub>H<sub>29</sub>N<sub>2</sub>O<sub>4</sub> 481.2122, found 481.2132.

*tert*-butyl **11a**-benzoyl-2-butyl-11-oxo-5,5a,11,11a-tetrahydro-6*H*-benzo[6,7]azepino[2,3-*b*]quinoline-6-carboxylate (**3am**)

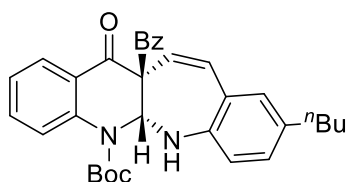

**3am**

The reaction was conducted with *tert*-butyl (2-(3-phenylpropioloyl)phenyl)carbamate (**1a**, 0.2 mmol, 64.2 mg), 6-butylquinoline *N*-oxide (**2n**, 0.4 mmol, 80.4 mg), 4Å

molecular sieves (40 mg) and Cu(hfacac)<sub>2</sub> (0.04 mmol, 19.1 mg) in toluene (4.0 mL) at 120 °C (120 °C, heating mantle temperature). Purification by column chromatography on silica gel (petroleum ether/ethyl acetate = 10:1) yielded **3am** (96.2 mg, 92%) as a pale yellow oil.

<sup>1</sup>H NMR (400 MHz, CDCl<sub>3</sub>) δ 8.06 (d, *J* = 7.8 Hz, 1H), 8.02 (d, *J* = 8.0 Hz, 2H), 7.81 (d, *J* = 8.4 Hz, 1H), 7.53 – 7.48 (m, 2H), 7.41 – 7.37 (m, 2H), 7.20 (t, *J* = 7.5 Hz, 1H), 7.06 (s, 1H), 6.91 (d, *J* = 8.1 Hz, 1H), 6.76 (d, *J* = 12.4 Hz, 1H), 6.59 (d, *J* = 8.0 Hz, 1H), 6.42 (s, 1H), 6.15 (d, *J* = 12.3 Hz, 1H), 3.95 (s, 1H), 2.54 (t, 2H), 1.61 – 1.53 (m, 2H), 1.37 – 1.32 (m, 2H), 1.19 (s, 9H), 0.93 (t, *J* = 7.3 Hz, 3H); <sup>13</sup>C NMR (100 MHz, CDCl<sub>3</sub>) δ 195.3, 191.5, 151.2, 142.9, 139.0, 135.6, 135.4, 133.9, 133.4, 133.3, 132.1, 129.6, 129.1, 128.6, 128.1, 124.5, 122.7, 122.4, 122.2, 121.8, 118.5, 83.2, 71.3, 71.2, 34.6, 33.7, 27.7, 22.3, 13.9; IR (neat): 3445(br), 2925, 2853, 2064, 1867, 1703, 1657, 1634, 1558, 1506, 1458, 1235, 1013, 516, 461; HRMS (ESI) *m/z*: [M + H]<sup>+</sup> calcd for C<sub>33</sub>H<sub>35</sub>N<sub>2</sub>O<sub>4</sub> 523.2591, found 523.2582.

**tert-butyl 11a-benzoyl-2-(tert-butyl)-11-oxo-5,5a,11,11a-tetrahydro-6H-benzo[6,7]azepino[2,3-*b*]quinoline-6-carboxylate (3an)**

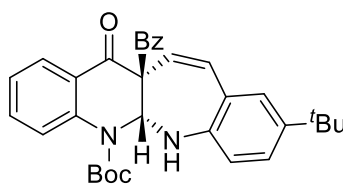

**3an**

The reaction was conducted with *tert*-butyl (2-(3-phenylpropioloyl)phenyl)carbamate (**1a**, 0.2 mmol, 64.2 mg), 6-(*tert*-butyl)quinoline *N*-oxide (**2o**, 0.4 mmol, 80.4 mg), 4Å molecular sieves (40 mg) and Cu(hfacac)<sub>2</sub> (0.04 mmol, 19.1 mg) in toluene (4.0 mL) at 120 °C (120 °C, heating mantle temperature). Purification by column chromatography on silica gel (petroleum ether/ethyl acetate = 10:1) yielded **3an** (100.4 mg, 96%) as a pale yellow oil.

$^1\text{H}$  NMR (400 MHz,  $\text{CDCl}_3$ )  $\delta$  8.06 (d,  $J = 7.8$  Hz, 1H), 8.02 (d,  $J = 7.3$  Hz, 2H), 7.79 (d,  $J = 8.1$  Hz, 1H), 7.55 – 7.48 (m, 2H), 7.42 – 7.38 (m, 2H), 7.24 – 7.18 (m, 2H), 7.13 – 7.11 (m, 1H), 6.80 (d,  $J = 12.4$  Hz, 1H), 6.61 (d,  $J = 8.3$  Hz, 1H), 6.44 (s, 1H), 6.14 (d,  $J = 12.3$  Hz, 1H), 3.96 (s, 1H), 1.30 (s, 9H), 1.19 (s, 9H);  $^{13}\text{C}$  NMR (100 MHz,  $\text{CDCl}_3$ )  $\delta$  195.3, 191.4, 151.2, 143.7, 142.4, 138.9, 135.6, 133.9, 133.4, 132.5, 130.3, 129.6, 128.6, 128.1, 126.2, 124.5, 122.5, 122.3, 121.9, 121.8, 118.3, 83.2, 71.2, 70.9, 34.0, 31.4, 27.8; IR (neat): 3444(br), 2065, 1868, 1656, 1650, 1644, 1633, 1507, 1477, 1417, 1315, 1118, 1010, 944, 508; HRMS (ESI)  $m/z$ :  $[\text{M} + \text{H}]^+$  calcd for  $\text{C}_{33}\text{H}_{35}\text{N}_2\text{O}_4$  523.2591, found 523.2589.

***tert*-butyl**                      **11a-benzoyl-2-methoxy-11-oxo-5,5a,11,11a-tetrahydro-6H-benzo[6,7]azepino[2,3-*b*]quinoline-6-carboxylate (3ao)**

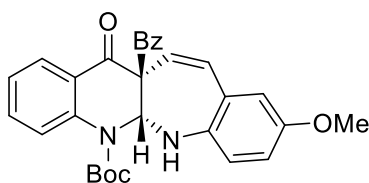

**3ao**

The reaction was conducted with *tert*-butyl (2-(3-phenylpropionyl)phenyl)carbamate (**1a**, 0.2 mmol, 64.2 mg), 6-methoxyquinoline *N*-oxide (**2p**, 0.4 mmol, 70.0 mg), 4Å molecular sieves (40 mg) and  $\text{Cu}(\text{hfacac})_2$  (0.04 mmol, 19.1 mg) in toluene (4.0 mL) at 120 °C (120 °C, heating mantle temperature). Purification by column chromatography on silica gel (petroleum ether/ethyl acetate = 10:1) yielded **3ao** (77.5 mg, 78%) as a pale yellow oil.

$^1\text{H}$  NMR (400 MHz,  $\text{CDCl}_3$ )  $\delta$  8.07 (d,  $J = 7.8$  Hz, 1H), 8.00 (d,  $J = 8.0$  Hz, 2H), 7.82 (d,  $J = 8.5$  Hz, 1H), 7.55 – 7.48 (m, 2H), 7.41 – 7.37 (m, 2H), 7.20 (t,  $J = 7.5$  Hz, 1H), 6.80 – 6.69 (m, 3H), 6.62 (d,  $J = 8.6$  Hz, 1H), 6.38 (s, 1H), 6.22 (d,  $J = 12.3$  Hz, 1H), 4.00 – 3.79 (m, 4H), 1.18 (s, 9H);  $^{13}\text{C}$  NMR (100 MHz,  $\text{CDCl}_3$ )  $\delta$  195.2, 191.5, 154.3, 151.2, 139.2, 139.1, 135.7, 134.0, 133.4, 131.6, 129.5, 128.6, 128.1, 124.5, 124.0, 123.8, 122.1, 121.7, 119.8, 117.4, 115.4, 83.2, 71.8, 71.3, 55.7, 27.7; IR (neat):

3445(br), 2923, 2850, 2064, 1922, 1828, 1810, 1790, 1770, 1737, 1703, 1645, 1270, 507, 499; HRMS (ESI) m/z: [M + H]<sup>+</sup> calcd for C<sub>30</sub>H<sub>29</sub>N<sub>2</sub>O<sub>5</sub> 497.2071, found 497.2064.

*tert*-butyl                      **11a-benzoyl-1-chloro-11-oxo-5,5a,11,11a-tetrahydro-6H-benzo[6,7]azepino[2,3-*b*]quinoline-6-carboxylate (3ap)**

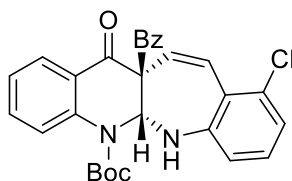

**3ap**

The reaction was conducted with *tert*-butyl (2-(3-phenylpropionyl)phenyl)carbamate (**1a**, 0.2 mmol, 64.2 mg), 5-chloroquinoline *N*-oxide (**2q**, 0.4 mmol, 72.0 mg), 4Å molecular sieves (40 mg) and Cu(hfacac)<sub>2</sub> (0.04 mmol, 19.1 mg) in toluene (4.0 mL) at 120 °C (120 °C, heating mantle temperature). Purification by column chromatography on silica gel (petroleum ether/ethyl acetate = 10:1) yielded **3ap** (82.2 mg, 82%) as a pale yellow oil.

<sup>1</sup>H NMR (400 MHz, CDCl<sub>3</sub>) δ 7.98 (d, *J* = 7.8 Hz, 1H), 7.91 (d, *J* = 6.3 Hz, 2H), 7.78 (d, *J* = 8.3 Hz, 1H), 7.48 – 7.42 (m, 2H), 7.34 – 7.31 (m, 2H), 7.25 (d, *J* = 12.7 Hz, 1H), 7.12 (t, *J* = 6.9 Hz, 1H), 7.00 – 6.90 (m, 2H), 6.52 (d, *J* = 6.2 Hz, 1H), 6.36 – 6.31 (m, 2H), 4.00 (s, 1H), 1.14 (s, 9H); <sup>13</sup>C NMR (100 MHz, CDCl<sub>3</sub>) δ 194.6, 191.1, 151.2, 147.8, 139.0, 136.4, 135.7, 134.4, 133.5, 129.4, 129.0, 128.6, 128.2, 127.0, 125.3, 124.6, 122.7, 122.0, 121.4, 120.8, 117.5, 83.4, 72.3, 70.9, 27.7; IR (neat): 3444(br), 2928, 2853, 2069, 1661, 1643, 1634, 1478, 1458, 1395, 1310, 1203, 1013, 941, 760; HRMS (ESI) m/z: [M + H]<sup>+</sup> calcd for C<sub>29</sub>H<sub>26</sub>ClN<sub>2</sub>O<sub>4</sub> 501.1576, found 501.1574.

*tert*-butyl                      **11a-benzoyl-1-methyl-11-oxo-5,5a,11,11a-tetrahydro-6H-benzo[6,7]azepino[2,3-*b*]quinoline-6-carboxylate (3aq)**

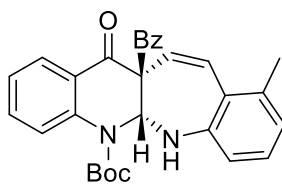

**3aq**

The reaction was conducted with *tert*-butyl (2-(3-phenylpropioloyl)phenyl)carbamate (**1a**, 0.2 mmol, 64.2 mg), 5-methylquinoline *N*-oxide (**2r**, 0.4 mmol, 63.6 mg), 4Å molecular sieves (40 mg) and Cu(hfacac)<sub>2</sub> (0.04 mmol, 19.1 mg) in toluene (4.0 mL) at 120 °C (120 °C, heating mantle temperature). Purification by column chromatography on silica gel (petroleum ether/ethyl acetate = 10:1) yielded **3aq** (91.4 mg, 95%) as a pale yellow oil.

<sup>1</sup>H NMR (400 MHz, CDCl<sub>3</sub>) δ 8.05 – 8.01 (m, 3H), 7.85 (d, *J* = 5.3 Hz, 1H), 7.55 – 7.48 (m, 2H), 7.41 – 7.37 (m, 2H), 7.21 – 7.16 (m, 1H), 7.02 – 6.95 (m, 2H), 6.83 – 6.80 (m, 1H), 6.55 (d, *J* = 7.8 Hz, 1H), 6.42 (s, 1H), 6.34 (d, *J* = 8.9 Hz, 1H), 3.96 (s, 1H), 2.46 (s, 3H), 1.21 (s, 9H); <sup>13</sup>C NMR (100 MHz, CDCl<sub>3</sub>) δ 195.2, 191.5, 151.2, 146.5, 139.2, 139.0, 135.8, 134.2, 133.3, 129.5, 128.5, 128.4, 128.1, 127.7, 124.4, 123.9, 123.7, 122.2, 121.9, 121.8, 117.2, 83.1, 72.6, 71.0, 27.7, 21.0; IR (neat): 3445(br), 2926, 2852, 2064, 1867, 1828, 1688, 1657, 1644, 1558, 1473, 1160, 1010, 942, 765; HRMS (ESI) *m/z*: [M + H]<sup>+</sup> calcd for C<sub>30</sub>H<sub>29</sub>N<sub>2</sub>O<sub>4</sub> 481.2122, found 481.2120.

*tert*-butyl **11a-benzoyl-13-chloro-11-oxo-5,5a,11,11a-tetrahydro-6*H*-benzo[6,7]azepino[2,3-*b*]quinoline-6-carboxylate (3ar)**

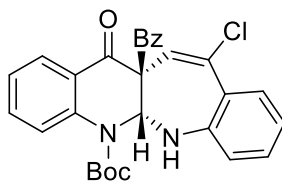

**3ar**



The reaction was conducted with *tert*-butyl (2-(3-phenylpropioloyl)phenyl)carbamate (**1a**, 0.2 mmol, 64.2 mg), 4-chloroquinoline *N*-oxide (**2s**, 0.4 mmol, 72.0 mg), 4Å molecular sieves (40 mg) and Cu(hfacac)<sub>2</sub> (0.04 mmol, 19.1 mg) in toluene (4.0 mL) at 120 °C (120 °C, heating mantle temperature). Purification by column chromatography on silica gel (petroleum ether/ethyl acetate = 10:1) yielded **3ar** (67.1 mg, 67%) as a pale yellow oil.

<sup>1</sup>H NMR (400 MHz, CDCl<sub>3</sub>) δ 8.00 (d, *J* = 5.7 Hz, 2H), 7.86 (d, *J* = 3.5 Hz, 2H), 7.77 (d, *J* = 6.9 Hz, 1H), 7.56 – 7.43 (m, 4H), 7.11 – 7.00 (m, 3H), 6.82 (s, 1H), 6.62 – 6.51 (m, 2H), 4.06 (s, 1H), 1.28 (s, 9H); <sup>13</sup>C NMR (100 MHz, CDCl<sub>3</sub>) δ 194.2, 190.0, 151.4, 145.2, 139.4, 134.9, 134.4, 133.6, 133.4, 130.9, 129.9, 129.6, 128.7, 127.8, 124.5, 124.3, 123.8, 123.2, 122.8, 121.9, 120.0, 83.3, 74.9, 69.8, 27.8; IR (neat): 3445(br), 2924, 2851, 2064, 1867, 1828, 1703, 1656, 1634, 1558, 1516, 1280, 1021, 496, 489; HRMS (ESI) *m/z*: [M + H]<sup>+</sup> calcd for C<sub>29</sub>H<sub>26</sub>ClN<sub>2</sub>O<sub>4</sub> 501.1576, found 501.1571.

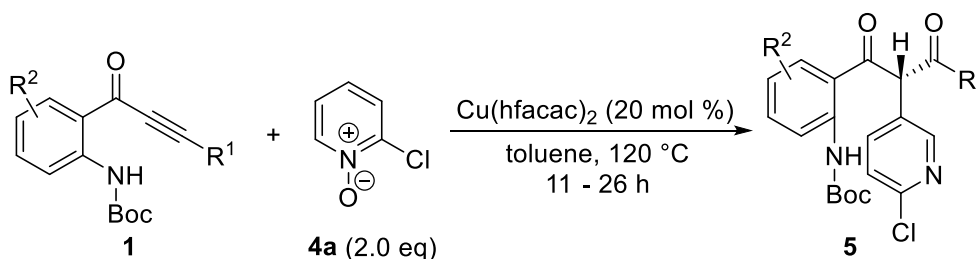

**Supplementary Figure 77.** Synthesis of pyridine-based diones **5**.

### General procedure for the synthesis of pyridine-based diones **5**:

2-Chloropyridine *N*-oxide **4a** (0.4 mmol, 51.8 mg) and Cu(hfacac)<sub>2</sub> (0.04 mmol, 19.1 mg) were added in this order to the alkynes **1** (0.2 mmol) in toluene (4.0 mL) at room temperature. The reaction mixture was stirred at 120 °C (120 °C, heating mantle temperature) and the progress of the reaction was monitored by TLC. Upon completion, the mixture was then concentrated and the residue was purified by chromatography on silica gel (eluent: petroleum ether/ethyl acetate) to afford the desired product **5**.

*tert*-butyl  
phenylpropanoyl)phenyl)carbamate (**5a**)

(2-(2-(6-chloropyridin-3-yl)-3-oxo-3-

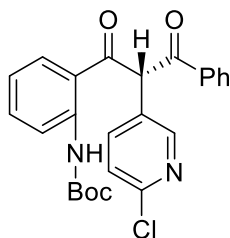

**5a**

The reaction was conducted with *tert*-butyl (2-(3-phenylpropioloyl)phenyl)carbamate (**1a**, 0.2 mmol, 64.2 mg), 2-chloropyridine *N*-oxide **4a** (0.4 mmol, 51.8 mg) and Cu(hfacac)<sub>2</sub> (0.04 mmol, 19.1 mg) in toluene (4.0 mL) at 120 °C (120 °C, heating mantle temperature). Purification by column chromatography on silica gel (petroleum ether/ethyl acetate = 5:1) yielded **5a** (54.1 mg, 60%) as a pale yellow oil.

<sup>1</sup>H NMR (400 MHz, CDCl<sub>3</sub>) δ 10.66 (s, 1H), 8.56 (d, *J* = 8.6 Hz, 1H), 8.42 (d, *J* = 2.3 Hz, 1H), 7.97 (d, *J* = 7.3 Hz, 2H), 7.82 (d, *J* = 7.4 Hz, 1H), 7.77 – 7.75 (m, 1H), 7.62 (t, *J* = 7.4 Hz, 1H), 7.56 – 7.47 (m, 3H), 7.37 (d, *J* = 8.3 Hz, 1H), 6.98 (t, *J* = 7.6 Hz, 1H), 6.67 (s, 1H), 1.49 (s, 9H); <sup>13</sup>C NMR (100 MHz, CDCl<sub>3</sub>) δ 196.1, 192.5, 152.8, 151.5, 150.2, 143.5, 140.4, 135.9, 134.9, 134.2, 130.5, 129.2, 128.7, 128.2, 124.5, 121.3, 119.8, 119.1, 81.0, 59.6, 28.2; IR (neat): 3422 (br), 2977, 2925, 2853, 1731, 1703, 1681, 1524, 1452, 1417, 1367, 1251, 1024, 864, 688; HRMS (ESI) *m/z*: [M + H]<sup>+</sup> calcd for C<sub>25</sub>H<sub>24</sub>ClN<sub>2</sub>O<sub>4</sub> 451.1419, found 451.1425.

*tert*-butyl  
oxopropanoyl)phenyl)carbamate (**5b**)

(2-(2-(6-chloropyridin-3-yl)-3-(4-fluorophenyl)-3-

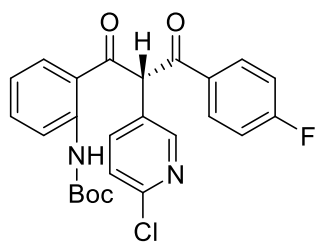

**5b**

The reaction was conducted with *tert*-butyl (2-(3-(4-fluorophenyl)propioloyl)phenyl)carbamate (**1b**, 0.2 mmol, 67.8 mg), 2-chloropyridine *N*-oxide **4a** (0.4 mmol, 51.8 mg) and Cu(hfacac)<sub>2</sub> (0.04 mmol, 19.1 mg) in toluene (4.0 mL) at 120 °C (120 °C, heating mantle temperature). Purification by column chromatography on silica gel (petroleum ether/ethyl acetate = 5:1) yielded **5b** (62.8 mg, 67%) as a pale yellow oil.

<sup>1</sup>H NMR (400 MHz, CDCl<sub>3</sub>) δ 10.63 (s, 1H), 8.57 (d, *J* = 8.6 Hz, 1H), 8.41 (d, *J* = 2.4 Hz, 1H), 8.01 – 7.98 (m, 2H), 7.81 (d, *J* = 8.1 Hz, 1H), 7.76 – 7.73 (m, 1H), 7.54 (t, *J* = 7.9 Hz, 1H), 7.38 (d, *J* = 8.4 Hz, 1H), 7.18 – 7.14 (m, 2H), 6.99 (t, *J* = 7.7 Hz, 1H), 6.61 (s, 1H), 1.50 (s, 9H); <sup>13</sup>C NMR (100 MHz, CDCl<sub>3</sub>) δ 196.0, 191.0, 166.2 (d, *J* = 256.0 Hz), 152.8, 151.6, 150.2, 143.5, 140.3, 136.0, 131.5 (d, *J* = 10.0 Hz), 131.3 (d, *J* = 3.0 Hz), 130.4, 128.1, 124.5, 121.3, 119.9, 119.0, 116.5 (d, *J* = 22.0 Hz), 81.0, 59.5, 28.2; IR (neat): 3447 (br), 2957, 2924, 2853, 1732, 1681, 1659, 1523, 1454, 1368, 1250, 1107, 871, 750, 582; HRMS (ESI) *m/z*: [M + Na]<sup>+</sup> calcd for C<sub>25</sub>H<sub>22</sub>ClFN<sub>2</sub>NaO<sub>4</sub> 491.1144, found 491.1147.

*tert*-butyl (2-(3-(4-chlorophenyl)-2-(6-chloropyridin-3-yl)-3-oxopropanoyl)phenyl)carbamate (**5c**)

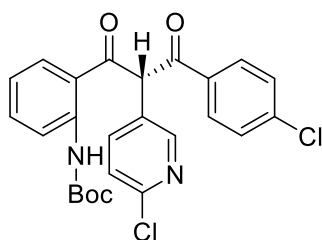

**5c**

The reaction was conducted with *tert*-butyl (2-(3-(4-chlorophenyl)propioloyl)phenyl)carbamate (**1c**, 0.2 mmol, 71.2 mg), 2-chloropyridine *N*-oxide **4a** (0.4 mmol, 51.8 mg) and Cu(hfacac)<sub>2</sub> (0.04 mmol, 19.1 mg) in toluene (4.0 mL) at 120 °C (120 °C, heating mantle temperature). Purification by column chromatography on silica gel (petroleum ether/ethyl acetate = 5:1) yielded **5c** (60.1 mg, 62%) as a pale yellow oil.

<sup>1</sup>H NMR (400 MHz, CDCl<sub>3</sub>) δ 10.62 (s, 1H), 8.57 (d, *J* = 8.6 Hz, 1H), 8.45 (s, 1H), 7.90 (d, *J* = 8.2 Hz, 2H), 7.80 (d, *J* = 8.1 Hz, 1H), 7.74 (d, *J* = 8.0 Hz, 1H), 7.55 (t, *J* = 7.8 Hz, 1H), 7.46 (d, *J* = 8.3 Hz, 2H), 7.39 (d, *J* = 8.2 Hz, 1H), 6.99 (t, *J* = 7.5 Hz, 1H), 6.61 (s, 1H), 1.50 (s, 9H); <sup>13</sup>C NMR (100 MHz, CDCl<sub>3</sub>) δ 195.9, 191.4, 152.7, 150.1, 143.5, 140.9, 140.4, 136.1, 133.2, 130.5, 130.1, 129.6, 121.3, 119.9, 119.0, 81.1, 59.6, 28.2; IR (neat): 3424 (br), 2926, 2854, 1735, 1677, 1586, 1526, 1453, 1254, 1198, 1149, 1049, 852, 761, 663; HRMS (ESI) *m/z*: [M + Na]<sup>+</sup> calcd for C<sub>25</sub>H<sub>22</sub>Cl<sub>2</sub>N<sub>2</sub>NaO<sub>4</sub> 507.0849, found 507.0849.

***tert*-butyl (2-(3-(4-bromophenyl)-2-(6-chloropyridin-3-yl)-3-oxopropanoyl)phenyl)carbamate (5d)**

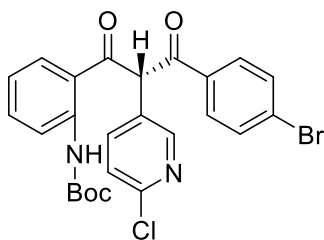

**5d**

The reaction was conducted with *tert*-butyl (2-(3-(4-bromophenyl)propioloyl)phenyl)carbamate (**1d**, 0.2 mmol, 80.0 mg), 2-chloropyridine *N*-oxide **4a** (0.4 mmol, 51.8 mg) and Cu(hfacac)<sub>2</sub> (0.04 mmol, 19.1 mg) in toluene (4.0 mL) at 120 °C (120 °C, heating mantle temperature). Purification by column chromatography on silica gel (petroleum ether/ethyl acetate = 5:1) yielded **5d** (70.0 mg, 66%) as a pale yellow oil.

$^1\text{H}$  NMR (400 MHz,  $\text{CDCl}_3$ )  $\delta$  10.62 (s, 1H), 8.57 (d,  $J = 8.6$  Hz, 1H), 8.41 (s, 1H), 7.83 – 7.79 (m, 3H), 7.74 – 7.72 (m, 1H), 7.63 (d,  $J = 8.3$  Hz, 2H), 7.54 (t,  $J = 8.2$  Hz, 1H), 7.38 (d,  $J = 8.4$  Hz, 1H), 6.99 (t,  $J = 7.7$  Hz, 1H), 6.58 (s, 1H), 1.50 (s, 9H);  $^{13}\text{C}$  NMR (100 MHz,  $\text{CDCl}_3$ )  $\delta$  195.9, 191.6, 152.8, 151.7, 150.2, 143.6, 140.3, 136.1, 133.7, 132.6, 130.5, 130.1, 129.7, 128.0, 124.6, 121.3, 119.9, 119.0, 81.1, 59.6, 28.2; IR (neat): 3288 (br), 2977, 2926, 2853, 1732, 1682, 1581, 1523, 1452, 1392, 1251, 1151, 1024, 805, 751; HRMS (ESI)  $m/z$ :  $[\text{M} + \text{Na}]^+$  calcd for  $\text{C}_{25}\text{H}_{22}\text{BrClN}_2\text{NaO}_4$  551.0344, found 551.0344.

***tert*-butyl (2-(2-(6-chloropyridin-3-yl)-3-oxo-3-(4-(trifluoromethyl)phenyl)propanoyl)phenyl)carbamate (5e)**

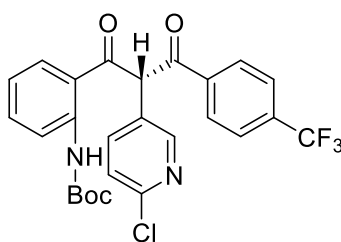

**5e**

The reaction was conducted with *tert*-butyl (2-(3-(4-(trifluoromethyl)phenyl)propioloyl)phenyl)carbamate (**1e**, 0.2 mmol, 77.8 mg), 2-chloropyridine *N*-oxide **4a** (0.4 mmol, 51.8 mg) and  $\text{Cu}(\text{hfacac})_2$  (0.04 mmol, 19.1 mg) in toluene (4.0 mL) at 120 °C (120 °C, heating mantle temperature). Purification by column chromatography on silica gel (petroleum ether/ethyl acetate = 5:1) yielded **5e** (65.4 mg, 63%) as a pale yellow oil.

$^1\text{H}$  NMR (400 MHz,  $\text{CDCl}_3$ )  $\delta$  10.59 (s, 1H), 8.58 (d,  $J = 8.6$  Hz, 1H), 8.43 (d,  $J = 2.1$  Hz, 1H), 8.07 (d,  $J = 8.2$  Hz, 2H), 7.82 (d,  $J = 8.0$  Hz, 1H), 7.77 – 7.72 (m, 3H), 7.57 (t,  $J = 7.9$  Hz, 1H), 7.39 (d,  $J = 8.3$  Hz, 1H), 7.01 (t,  $J = 7.6$  Hz, 1H), 6.63 (s, 1H), 1.49 (s, 9H);  $^{13}\text{C}$  NMR (100 MHz,  $\text{CDCl}_3$ )  $\delta$  195.9, 191.7, 152.7, 151.8, 150.2, 143.7, 140.3, 137.7, 136.3, 135.2, 130.5, 129.0, 127.7, 126.3 (q,  $J = 3.5$  Hz), 124.7, 121.4, 120.0, 118.8, 81.2, 59.9, 28.2; IR (neat): 3291 (br), 3086, 2979, 2929, 2854, 1732,

1606, 1580, 1523, 1454, 1326, 1251, 1152, 1068, 875; HRMS (ESI)  $m/z$ :  $[M + Na]^+$  calcd for  $C_{26}H_{22}ClF_3N_2NaO_4$  541.1112, found 541.1113.

*tert*-butyl (2-(2-(6-chloropyridin-3-yl)-3-oxo-3-(*p*-tolyl)propanoyl)phenyl)carbamate (**5f**)

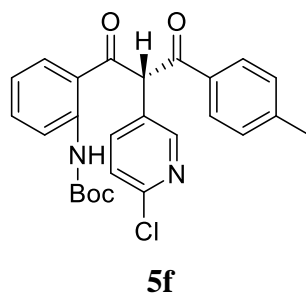

The reaction was conducted with *tert*-butyl (2-(3-(*p*-tolyl)propioloyl)phenyl)carbamate (**1h**, 0.2 mmol, 64.2 mg), 2-chloropyridine *N*-oxide **4a** (0.4 mmol, 51.8 mg) and  $Cu(hfacac)_2$  (0.04 mmol, 19.1 mg) in toluene (4.0 mL) at 120 °C (120 °C, heating mantle temperature). Purification by column chromatography on silica gel (petroleum ether/ethyl acetate = 5:1) yielded **5f** (69.8 mg, 75%) as a pale yellow oil.

$^1H$  NMR (400 MHz,  $CDCl_3$ )  $\delta$  10.67 (s, 1H), 8.56 (d,  $J = 8.6$  Hz, 1H), 8.41 (d,  $J = 2.1$  Hz, 1H), 7.87 (d,  $J = 8.0$  Hz, 2H), 7.81 (d,  $J = 8.1$  Hz, 1H), 7.77 – 7.74 (m, 1H), 7.53 (t,  $J = 7.9$  Hz, 1H), 7.37 (d,  $J = 8.3$  Hz, 1H), 7.28 (d,  $J = 8.0$  Hz, 2H), 6.97 (t,  $J = 7.6$  Hz, 1H), 6.63 (s, 1H), 2.42 (s, 3H), 1.49 (s, 9H);  $^{13}C$  NMR (100 MHz,  $CDCl_3$ )  $\delta$  196.2, 192.1, 152.8, 151.4, 150.2, 145.5, 143.4, 140.4, 135.8, 132.3, 130.5, 129.9, 128.9, 128.4, 124.5, 121.2, 119.8, 119.2, 80.9, 59.5, 28.2, 21.7; IR (neat): 3443 (br), 2925, 2089, 1636, 1523, 1453, 1392, 1368, 1250, 1151, 1107, 1048, 750, 430, 410; HRMS (ESI)  $m/z$ :  $[M + Na]^+$  calcd for  $C_{26}H_{25}ClN_2NaO_4$  487.1395, found 487.1396.

*tert*-butyl (2-(2-(6-chloropyridin-3-yl)-3-(4-ethylphenyl)-3-oxopropanoyl)phenyl)carbamate (**5g**)

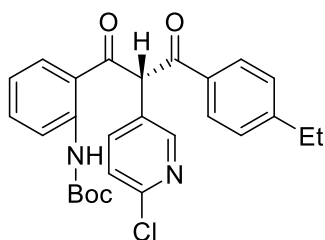

**5g**

The reaction was conducted with *tert*-butyl (2-(3-(4-ethylphenyl)propioloyl)phenyl)carbamate (**1i**, 0.2 mmol, 69.8 mg), 2-chloropyridine *N*-oxide **4a** (0.4 mmol, 51.8 mg) and Cu(hfacac)<sub>2</sub> (0.04 mmol, 19.1 mg) in toluene (4.0 mL) at 120 °C (120 °C, heating mantle temperature). Purification by column chromatography on silica gel (petroleum ether/ethyl acetate = 5:1) yielded **5g** (62.3 mg, 65%) as a pale yellow oil.

<sup>1</sup>H NMR (400 MHz, CDCl<sub>3</sub>) δ 10.68 (s, 1H), 8.56 (d, *J* = 8.6 Hz, 1H), 8.41 (d, *J* = 2.4 Hz, 1H), 7.90 (d, *J* = 8.3 Hz, 2H), 7.81 (d, *J* = 8.1 Hz, 1H), 7.77 – 7.75 (m, 1H), 7.53 (t, *J* = 7.9 Hz, 1H), 7.38 – 7.35 (m, 1H), 7.31 (d, *J* = 8.2 Hz, 2H), 6.98 (t, *J* = 7.7 Hz, 1H), 6.64 (s, 1H), 2.71 (q, *J* = 7.6 Hz, 2H), 1.49 (s, 9H), 1.27 – 1.23 (m, 3H); <sup>13</sup>C NMR (100 MHz, CDCl<sub>3</sub>) δ 196.2, 192.1, 152.8, 151.6, 151.4, 150.2, 143.4, 140.5, 135.8, 132.5, 130.5, 129.0, 128.8, 128.4, 124.4, 121.2, 119.8, 119.2, 80.9, 59.5, 29.0, 28.2, 15.0; IR (neat): 3445 (br), 2922, 2850, 1704, 1657, 1621, 1585, 1525, 1456, 1417, 1367, 1121, 1043, 777, 625; HRMS (ESI) *m/z*: [M + Na]<sup>+</sup> calcd for C<sub>27</sub>H<sub>27</sub>ClN<sub>2</sub>NaO<sub>4</sub> 501.1552, found 501.1554.

*tert*-butyl (2-(3-(4-(*tert*-butyl)phenyl)-2-(6-chloropyridin-3-yl)-3-oxopropanoyl)phenyl)carbamate (**5h**)

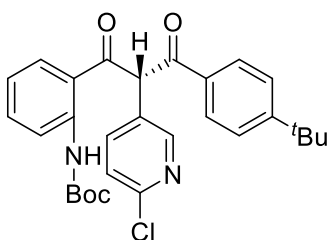

**5h**

The reaction was conducted with *tert*-butyl (2-(3-(4-(*tert*-butyl)phenyl)propioloyl)phenyl)carbamate (**1j**, 0.2 mmol, 75.4 mg), 2-chloropyridine *N*-oxide **4a** (0.4 mmol, 51.8 mg) and Cu(hfacac)<sub>2</sub> (0.04 mmol, 19.1 mg) in toluene (4.0 mL) at 120 °C (120 °C, heating mantle temperature). Purification by column chromatography on silica gel (petroleum ether/ethyl acetate = 5:1) yielded **5h** (66.9 mg, 66%) as a pale yellow oil.

<sup>1</sup>H NMR (400 MHz, CDCl<sub>3</sub>) δ 10.69 (s, 1H), 8.56 (d, *J* = 8.6 Hz, 1H), 8.41 (s, 1H), 7.92 (d, *J* = 6.9 Hz, 2H), 7.82 (d, *J* = 8.1 Hz, 1H), 7.76 (d, *J* = 8.3 Hz, 1H), 7.56 – 7.49 (m, 3H), 7.37 (d, *J* = 7.4 Hz, 1H), 6.98 (t, *J* = 7.7 Hz, 1H), 6.65 (s, 1H), 1.50 (s, 9H), 1.33 (s, 9H); <sup>13</sup>C NMR (100 MHz, CDCl<sub>3</sub>) δ 196.2, 192.1, 158.4, 152.9, 151.4, 150.3, 143.4, 140.5, 135.8, 132.1, 130.5, 128.8, 128.4, 126.3, 124.5, 121.3, 119.8, 119.2, 80.9, 59.5, 35.3, 31.0, 28.2; IR (neat): 3446 (br), 2962, 2923, 2852, 1721, 1682, 1646, 1581, 1525, 1454, 1367, 1252, 1153, 871, 753; HRMS (ESI) *m/z*: [M + Na]<sup>+</sup> calcd for C<sub>29</sub>H<sub>31</sub>ClN<sub>2</sub>NaO<sub>4</sub> 529.1865, found 529.1868.

***tert*-butyl (2-(2-(6-chloropyridin-3-yl)-3-(3-fluorophenyl)-3-oxopropanoyl)phenyl)carbamate (5i)**

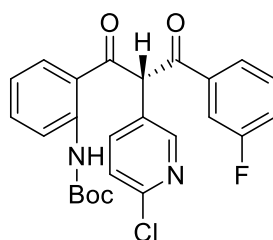

**5i**

The reaction was conducted with *tert*-butyl (2-(3-(3-fluorophenyl)propioloyl)phenyl)carbamate (**1i**, 0.2 mmol, 67.8 mg), 2-chloropyridine *N*-oxide **4a** (0.4 mmol, 51.8 mg) and Cu(hfacac)<sub>2</sub> (0.04 mmol, 19.1 mg) in toluene (4.0 mL) at 120 °C (120 °C, heating mantle temperature). Purification by column chromatography on silica gel (petroleum ether/ethyl acetate = 5:1) yielded **5i** (63.8 mg, 68%) as a pale yellow oil.



$^1\text{H}$  NMR (400 MHz,  $\text{CDCl}_3$ )  $\delta$  10.55 (s, 1H), 8.50 (d,  $J = 8.6$  Hz, 1H), 8.34 (s, 1H), 7.74 (d,  $J = 8.0$  Hz, 1H), 7.68 – 7.64 (m, 2H), 7.59 (d,  $J = 9.2$  Hz, 1H), 7.48 (t,  $J = 7.9$  Hz, 1H), 7.43 – 7.37 (m, 1H), 7.31 (d,  $J = 8.2$  Hz, 1H), 7.25 (t,  $J = 8.1$  Hz, 1H), 6.93 (t,  $J = 7.6$  Hz, 1H), 6.53 (s, 1H), 1.42 (s, 9H);  $^{13}\text{C}$  NMR (100 MHz,  $\text{CDCl}_3$ )  $\delta$  195.9, 191.4, 163.0 (d,  $J = 248.0$  Hz), 152.8, 151.7, 150.2, 143.6, 140.3, 137.0 (d,  $J = 6.0$  Hz), 136.1, 130.9 (d,  $J = 8.0$  Hz), 130.5, 127.9, 124.6, 124.3 (d,  $J = 3.0$  Hz), 121.4 (d,  $J = 22.0$  Hz), 121.3, 119.9, 118.9, 115.6 (d,  $J = 22.0$  Hz), 81.1, 59.7, 28.2; IR (neat): 3296 (br), 2972, 2926, 1719, 1686, 1582, 1525, 1455, 1393, 1297, 1252, 1153, 1023, 749, 677; HRMS (ESI)  $m/z$ :  $[\text{M} + \text{Na}]^+$  calcd for  $\text{C}_{25}\text{H}_{22}\text{ClFN}_2\text{NaO}_4$  491.1144, found 491.1147.

***tert*-butyl (2-(2-(6-chloropyridin-3-yl)-3-oxo-3-(*m*-tolyl)propanoyl)phenyl)carbamate (5j)**

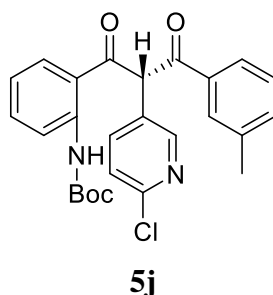

The reaction was conducted with *tert*-butyl (2-(3-(*m*-tolyl)propanoyl)phenyl)carbamate (**1n**, 0.2 mmol, 67.0 mg), 2-chloropyridine *N*-oxide **4a** (0.4 mmol, 51.8 mg) and  $\text{Cu}(\text{hfacac})_2$  (0.04 mmol, 19.1 mg) in toluene (4.0 mL) at 120 °C (120 °C, heating mantle temperature). Purification by column chromatography on silica gel (petroleum ether/ethyl acetate = 5:1) yielded **5j** (63.2 mg, 68%) as a pale yellow oil.

$^1\text{H}$  NMR (400 MHz,  $\text{CDCl}_3$ )  $\delta$  10.65 (s, 1H), 8.56 (d,  $J = 8.6$  Hz, 1H), 8.42 (d,  $J = 2.3$  Hz, 1H), 7.82 – 7.74 (m, 4H), 7.53 (t,  $J = 7.8$  Hz, 1H), 7.43 (d,  $J = 7.5$  Hz, 1H), 7.39 – 7.35 (m, 2H), 6.98 (t,  $J = 7.7$  Hz, 1H), 6.65 (s, 1H), 2.40 (s, 3H), 1.49 (s, 9H);  $^{13}\text{C}$  NMR (100 MHz,  $\text{CDCl}_3$ )  $\delta$  196.2, 192.7, 152.8, 151.5, 150.3, 143.4, 140.4, 139.3,

135.8, 135.1, 134.9, 130.5, 129.3, 129.1, 128.3, 126.0, 124.5, 121.3, 119.8, 119.2, 81.0, 59.6, 28.2, 21.4; IR (neat): 3435 (br), 2925, 2853, 1732, 1681, 1581, 1524, 1453, 1368, 1251, 1150, 1049, 750, 696, 604; HRMS (ESI)  $m/z$ :  $[M + Na]^+$  calcd for  $C_{26}H_{25}ClN_2NaO_4$  487.1395, found 487.1398.

***tert*-butyl (2-(2-(6-chloropyridin-3-yl)-3-(3,5-dimethylphenyl)-3-oxopropanoyl)phenyl)carbamate (5k)**

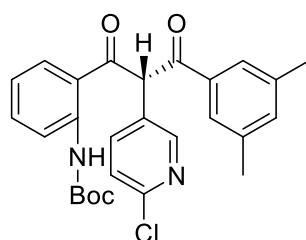

**5k**

The reaction was conducted with *tert*-butyl (2-(3-(3,5-dimethylphenyl)propionoyl)phenyl)carbamate (**1r**, 0.2 mmol, 69.8 mg), 2-chloropyridine *N*-oxide **4a** (0.4 mmol, 51.8 mg) and  $Cu(hfacac)_2$  (0.04 mmol, 19.1 mg) in toluene (4.0 mL) at 120 °C (120 °C, heating mantle temperature). Purification by column chromatography on silica gel (petroleum ether/ethyl acetate = 5:1) yielded **5k** (61.3 mg, 64%) as a pale yellow oil.

$^1H$  NMR (400 MHz,  $CDCl_3$ )  $\delta$  10.66 (s, 1H), 8.56 (d,  $J = 8.6$  Hz, 1H), 8.41 (s, 1H), 7.80 – 7.74 (m, 2H), 7.57 (s, 2H), 7.53 (t,  $J = 7.9$  Hz, 1H), 7.37 (d,  $J = 8.3$  Hz, 1H), 7.25 (s, 1H), 6.97 (t,  $J = 7.6$  Hz, 1H), 6.64 (s, 1H), 2.35 (s, 6H), 1.50 (s, 9H);  $^{13}C$  NMR (100 MHz,  $CDCl_3$ )  $\delta$  196.2, 192.9, 152.8, 151.4, 150.3, 143.3, 140.5, 139.0, 136.1, 135.8, 134.9, 130.5, 128.4, 126.6, 124.5, 121.2, 119.8, 119.3, 80.9, 59.6, 28.2, 21.3; IR (neat): 3435 (br), 2923, 2852, 1731, 1643, 1581, 1523, 1453, 1367, 1307, 1250, 1151, 1049, 750, 421; HRMS (ESI)  $m/z$ :  $[M + Na]^+$  calcd for  $C_{27}H_{27}ClN_2NaO_4$  501.1552, found 501.1553.

*tert*-butyl

**(2-(2-(6-chloropyridin-3-yl)-3-oxo-3-(thiophen-3-yl)propanoyl)phenyl)carbamate (5l)**

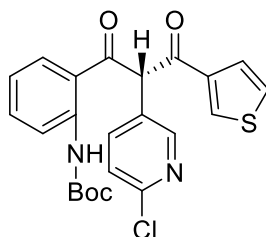

**5l**

The reaction was conducted with *tert*-butyl (2-(3-(thiophen-3-yl)propioloyl)phenyl)carbamate (**1s**, 0.2 mmol, 65.4 mg), 2-chloropyridine *N*-oxide **4a** (0.4 mmol, 51.8 mg) and Cu(hfacac)<sub>2</sub> (0.04 mmol, 19.1 mg) in toluene (4.0 mL) at 120 °C (120 °C, heating mantle temperature). Purification by column chromatography on silica gel (petroleum ether/ethyl acetate = 5:1) yielded **5l** (63.1 mg, 69%) as a pale yellow oil.

<sup>1</sup>H NMR (400 MHz, CDCl<sub>3</sub>) δ 10.66 (s, 1H), 8.56 (d, *J* = 8.6 Hz, 1H), 8.41 (s, 1H), 8.12 (s, 1H), 7.86 – 7.77 (m, 2H), 7.60 – 7.55 (m, 2H), 7.39 – 7.34 (m, 2H), 7.00 (t, *J* = 7.6 Hz, 1H), 6.48 (s, 1H), 1.50 (s, 9H); <sup>13</sup>C NMR (100 MHz, CDCl<sub>3</sub>) δ 195.9, 186.4, 152.8, 151.5, 150.1, 143.4, 140.4, 140.1, 136.0, 133.8, 130.5, 128.1, 127.5, 127.1, 124.5, 121.3, 119.8, 119.2, 81.0, 61.1, 28.2; IR (neat): 3420 (br), 2920, 2849, 1721, 1673, 1581, 1525, 1454, 1393, 1252, 1151, 1050, 1023, 819, 748; HRMS (ESI) *m/z*: [M + Na]<sup>+</sup> calcd for C<sub>23</sub>H<sub>21</sub>ClN<sub>2</sub>NaO<sub>4</sub>S 479.0803, found 479.0806.

*tert*-butyl

**(4-chloro-2-(2-(6-chloropyridin-3-yl)-3-oxo-3-phenylpropanoyl)phenyl)carbamate (5m)**

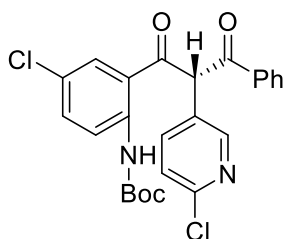

## 5m

The reaction was conducted with *tert*-butyl (4-chloro-2-(3-phenylpropioloyl)phenyl)carbamate (**1w**, 0.2 mmol, 71.1 mg), 2-chloropyridine *N*-oxide **4a** (0.4 mmol, 51.8 mg) and Cu(hfacac)<sub>2</sub> (0.04 mmol, 19.1 mg) in toluene (4.0 mL) at 120 °C (120 °C, heating mantle temperature). Purification by column chromatography on silica gel (petroleum ether/ethyl acetate = 5:1) yielded **5m** (63.1 mg, 65%) as a pale yellow oil.

<sup>1</sup>H NMR (400 MHz, CDCl<sub>3</sub>) δ 10.54 (s, 1H), 8.56 (d, *J* = 9.0 Hz, 1H), 8.44 (s, 1H), 7.96 (d, *J* = 8.1 Hz, 2H), 7.76 – 7.74 (m, 2H), 7.63 (t, *J* = 7.1 Hz, 1H), 7.53 – 7.47 (m, 3H), 7.39 (d, *J* = 8.3 Hz, 1H), 6.59 (s, 1H), 1.49 (s, 9H); <sup>13</sup>C NMR (100 MHz, CDCl<sub>3</sub>) δ 195.3, 192.4, 152.6, 151.7, 150.2, 141.9, 140.4, 135.6, 134.6, 134.4, 129.7, 129.3, 128.8, 127.8, 126.1, 124.6, 121.4, 120.3, 81.4, 59.6, 28.2; IR (neat): 3391 (br), 2923, 2852, 1731, 1668, 1574, 1510, 1303, 1280, 1253, 1152, 1108, 687, 653, 595; HRMS (ESI) *m/z*: [M + H]<sup>+</sup> calcd for C<sub>25</sub>H<sub>22</sub>Cl<sub>2</sub>N<sub>2</sub>NaO<sub>4</sub> 507.0849, found 507.0853.

## *tert*-butyl (2-(2-(6-chloropyridin-3-yl)-3-oxo-3-phenylpropanoyl)-4-methylphenyl)carbamate (**5n**)

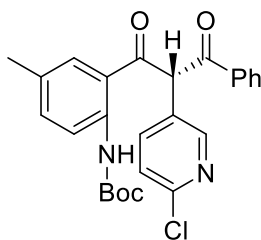

## 5n

The reaction was conducted with *tert*-butyl (4-methyl-2-(3-phenylpropioloyl)phenyl)carbamate (**1x**, 0.2 mmol, 67.0 mg), 2-chloropyridine *N*-oxide **4a** (0.4 mmol, 51.8 mg) and Cu(hfacac)<sub>2</sub> (0.04 mmol, 19.1 mg) in toluene (4.0 mL) at 120 °C (120 °C, heating mantle temperature). Purification by column chromatography on silica gel (petroleum ether/ethyl acetate = 5:1) yielded **5n** (61.4 mg, 66%) as a pale yellow oil.

$^1\text{H}$  NMR (400 MHz,  $\text{CDCl}_3$ )  $\delta$  10.53 (s, 1H), 8.48 – 8.43 (m, 2H), 7.97 (d,  $J = 7.4$  Hz, 2H), 7.79 – 7.76 (m, 1H), 7.64 – 7.60 (m, 2H), 7.51 – 7.47 (m, 2H), 7.39 – 7.34 (m, 2H), 6.66 (s, 1H), 2.23 (s, 3H), 1.48 (s, 9H);  $^{13}\text{C}$  NMR (100 MHz,  $\text{CDCl}_3$ )  $\delta$  196.0, 192.6, 152.9, 151.4, 150.2, 141.1, 140.4, 136.9, 134.9, 134.2, 130.6, 130.5, 129.2, 128.7, 128.3, 124.5, 119.8, 119.1, 80.8, 59.6, 28.2, 20.7; IR (neat): 3435 (br), 2978, 2925, 2853, 1730, 1655, 1582, 1522, 1449, 1367, 1255, 1152, 1107, 688, 672; HRMS (ESI)  $m/z$ :  $[\text{M} + \text{Na}]^+$  calcd for  $\text{C}_{26}\text{H}_{25}\text{ClN}_2\text{NaO}_4$  487.1395, found 487.1400.

***tert*-butyl (2-(2-(6-chloropyridin-3-yl)-3-oxo-3-phenylpropanoyl)-5-fluorophenyl)carbamate (5o)**

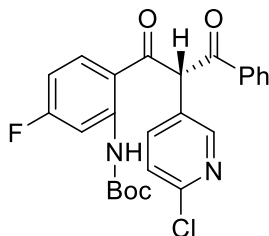

**5o**

The reaction was conducted with *tert*-butyl (5-fluoro-2-(3-phenylpropionyl)phenyl)carbamate (**1aa**, 0.2 mmol, 67.8 mg), 2-chloropyridine *N*-oxide **4a** (0.4 mmol, 51.8 mg) and  $\text{Cu}(\text{hfacac})_2$  (0.04 mmol, 19.1 mg) in toluene (4.0 mL) at 120 °C (120 °C, heating mantle temperature). Purification by column chromatography on silica gel (petroleum ether/ethyl acetate = 5:1) yielded **5o** (63.8 mg, 68%) as a pale yellow oil.

$^1\text{H}$  NMR (400 MHz,  $\text{CDCl}_3$ )  $\delta$  10.88 (s, 1H), 8.42 – 8.36 (m, 2H), 7.97 (d,  $J = 7.0$  Hz, 2H), 7.82 (t,  $J = 6.4$  Hz, 1H), 7.75 (d,  $J = 8.3$  Hz, 1H), 7.64 (t,  $J = 7.3$  Hz, 1H), 7.52 – 7.49 (m, 2H), 7.39 (d,  $J = 7.8$  Hz, 1H), 6.67 (t,  $J = 8.1$  Hz, 1H), 6.59 (s, 1H), 1.50 (s, 9H);  $^{13}\text{C}$  NMR (100 MHz,  $\text{CDCl}_3$ )  $\delta$  194.9, 192.4, 166.9 (d,  $J = 255.0$  Hz), 152.6, 151.6, 150.2, 146.3 (d,  $J = 13.0$  Hz), 140.4, 134.8, 134.4, 133.1 (d,  $J = 11.0$  Hz), 129.3, 128.8, 128.1, 124.6, 115.8 (d,  $J = 2.0$  Hz), 109.0 (d,  $J = 23.0$  Hz), 106.7 (d,  $J = 28.0$  Hz), 81.5, 59.7, 28.2; IR (neat): 3281 (br), 2979, 2928, 1734, 1661, 1586, 1527,

1450, 1392, 1369, 1268, 1253, 1000, 876, 687; HRMS (ESI) m/z: [M + Na]<sup>+</sup> calcd for C<sub>25</sub>H<sub>22</sub>NaClFN<sub>2</sub>O<sub>4</sub> 491.1144, found 491.1144.

***tert*-butyl (5-bromo-2-(2-(6-chloropyridin-3-yl)-3-oxo-3-phenylpropanoyl)phenyl)carbamate (5p)**

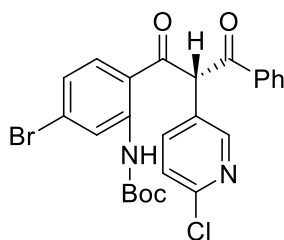

**5p**

The reaction was conducted with *tert*-butyl (5-bromo-2-(3-phenylpropioloyl)phenyl)carbamate (**1y**, 0.2 mmol, 80.0 mg), 2-chloropyridine *N*-oxide **4a** (0.4 mmol, 51.8 mg) and Cu(hfacac)<sub>2</sub> (0.04 mmol, 19.1 mg) in toluene (4.0 mL) at 120 °C (120 °C, heating mantle temperature). Purification by column chromatography on silica gel (petroleum ether/ethyl acetate = 5:1) yielded **5p** (70.0 mg, 66%) as a yellow solid (mp 126-128 °C).

<sup>1</sup>H NMR (400 MHz, CDCl<sub>3</sub>) δ 10.72 (s, 1H), 8.84 (s, 1H), 8.41 (s, 1H), 7.96 (d, *J* = 7.7 Hz, 2H), 7.73 (d, *J* = 8.3 Hz, 1H), 7.65 – 7.61 (m, 2H), 7.52 – 7.48 (m, 2H), 7.38 (d, *J* = 8.2 Hz, 1H), 7.11 (d, *J* = 8.6 Hz, 1H), 6.59 (s, 1H), 1.50 (s, 9H); <sup>13</sup>C NMR (100 MHz, CDCl<sub>3</sub>) δ 195.6, 192.4, 152.5, 151.6, 150.2, 144.2, 140.4, 134.7, 134.4, 131.4, 129.3, 128.8, 127.9, 124.5, 122.6, 117.7, 81.5, 59.6, 28.2; IR (neat): 3495 (br), 2927, 2854, 1736, 1704, 1698, 1580, 1391, 1368, 1224, 1150, 1050, 806, 752; HRMS (ESI) m/z: [M + H]<sup>+</sup> calcd for C<sub>25</sub>H<sub>23</sub>BrClN<sub>2</sub>O<sub>4</sub> 529.0524, found 529.0543.

***tert*-butyl (2-(2-(6-chloropyridin-3-yl)-3-oxo-3-phenylpropanoyl)-5-methylphenyl)carbamate (5q)**

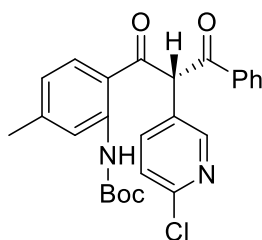

**5q**

The reaction was conducted with *tert*-butyl (5-methyl-2-(3-phenylpropionyl)phenyl)carbamate (**1z**, 0.2 mmol, 67.0 mg), 2-chloropyridine *N*-oxide **4a** (0.4 mmol, 51.8 mg) and Cu(hfacac)<sub>2</sub> (0.04 mmol, 19.1 mg) in toluene (4.0 mL) at 120 °C (120 °C, heating mantle temperature). Purification by column chromatography on silica gel (petroleum ether/ethyl acetate = 5:1) yielded **5q** (60.5 mg, 65%) as a pale yellow oil.

<sup>1</sup>H NMR (400 MHz, CDCl<sub>3</sub>) δ 10.73 (s, 1H), 8.45 – 8.41 (m, 2H), 7.97 (d, *J* = 7.4 Hz, 2H), 7.75 – 7.71 (m, 2H), 7.62 (t, *J* = 7.4 Hz, 1H), 7.51 – 7.47 (m, 2H), 7.37 (d, *J* = 8.3 Hz, 1H), 6.80 (d, *J* = 8.2 Hz, 1H), 6.63 (s, 1H), 2.38 (s, 3H), 1.49 (s, 9H); <sup>13</sup>C NMR (100 MHz, CDCl<sub>3</sub>) δ 195.6, 192.5, 152.9, 151.4, 150.2, 147.8, 143.6, 140.4, 135.0, 134.2, 130.6, 129.2, 128.7, 128.4, 124.5, 122.4, 119.8, 116.8, 80.9, 59.5, 28.2, 22.3; IR (neat): 3360 (br), 2920, 2850, 1730, 1646, 1610, 1570, 1459, 1368, 1254, 1147, 1107, 1050, 861, 769; HRMS (ESI) *m/z*: [M + Na]<sup>+</sup> calcd for C<sub>26</sub>H<sub>25</sub>ClN<sub>2</sub>NaO<sub>4</sub> 487.1395, found 487.1399.

### 3-(8-methylquinolin-2-yl)-2-phenyl-4*H*-chromen-4-one (**3aba**)

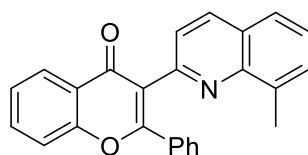

**3aba**

The reaction was conducted with 1-(2-hydroxyphenyl)-3-phenylprop-2-yn-1-one (**1ab**, 0.2 mmol, 44.4 mg), 8-methoxyquinoline *N*-oxide (**2a**, 0.4 mmol, 63.6 mg), 4Å molecular sieves (40 mg) and Cu(hfacac)<sub>2</sub> (0.04 mmol, 19.1 mg) in toluene (4.0 mL) at 120 °C (120 °C, heating mantle temperature). Purification by column

chromatography on silica gel (petroleum ether/ethyl acetate = 10:1) yielded **3aba** (62.4 mg, 86%) as a white solid (mp 105-107 °C).

The data of **3aba** was reported in previous literature.<sup>3</sup> <sup>1</sup>H NMR (400 MHz, CDCl<sub>3</sub>) δ 8.32 (d, *J* = 7.8 Hz, 1H), 8.13 (d, *J* = 8.4 Hz, 1H), 7.72 – 7.67 (m, 2H), 7.62 (d, *J* = 7.5 Hz, 1H), 7.56 (d, *J* = 8.3 Hz, 1H), 7.46 – 7.36 (m, 5H), 7.28 – 7.16 (m, 3H), 2.36 (s, 3H); <sup>13</sup>C NMR (100 MHz, CDCl<sub>3</sub>) δ 177.3, 164.4, 156.1, 151.9, 147.0, 137.4, 135.8, 133.8, 133.7, 129.9, 129.3, 129.1, 127.9, 127.1, 126.2(4), 126.2(0), 125.4, 125.2, 124.0, 123.2, 118.0, 17.6.

### 2-(8-methylquinolin-2(1*H*)-ylidene)-1,3-diphenylpropane-1,3-dione (**3aca**)

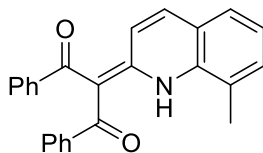

**3aca**

The reaction was conducted with 1,3-diphenylprop-2-yn-1-one (**1ac**, 0.2 mmol, 41.2 mg), 8-methoxyquinoline *N*-oxide (**2a**, 0.4 mmol, 63.6 mg), 4Å molecular sieves (40 mg) and Cu(hfacac)<sub>2</sub> (0.04 mmol, 19.1 mg) in toluene (4.0 mL) at 120 °C (120 °C, heating mantle temperature). Purification by column chromatography on silica gel (petroleum ether/ethyl acetate = 10:1) yielded **3aca** (64.2 mg, 88%) as a pale yellow oil.

The data of **3aca** was reported in previous literature.<sup>4</sup> <sup>1</sup>H NMR (400 MHz, CDCl<sub>3</sub>) δ 7.96 (s, 2H), 7.62 (d, *J* = 7.4 Hz, 2H), 7.55 – 7.49 (m, 2H), 7.41 (d, *J* = 6.3 Hz, 2H), 7.33 (t, *J* = 6.8 Hz, 1H), 7.21 (t, *J* = 7.1 Hz, 1H), 7.14 – 7.10 (m, 5H), 2.78 (s, 3H); <sup>13</sup>C NMR (100 MHz, CDCl<sub>3</sub>) δ 197.6, 192.6, 154.1, 142.7, 142.2, 138.8, 135.6, 132.2, 131.3, 129.6, 129.3, 128.1, 127.7(0), 127.6(6), 126.8, 125.4, 124.7, 123.6, 119.3, 106.3, 17.2.

### (*Z*)-2-(8-methylquinolin-2(1*H*)-ylidene)-1-phenylhexane-1,3-dione (**3aca**)



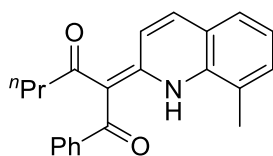

**3ada**

The reaction was conducted with 1-phenylhex-1-yn-3-one (**1ad**, 0.2 mmol, 34.4 mg), 8-methoxyquinoline *N*-oxide (**2a**, 0.4 mmol, 63.6 mg), 4Å molecular sieves (40 mg) and Cu(hfacac)<sub>2</sub> (0.04 mmol, 19.1 mg) in toluene (4.0 mL) at 120 °C (120 °C, heating mantle temperature). Purification by column chromatography on silica gel (petroleum ether/ethyl acetate = 10:1) yielded **3ada** (57.6 mg, 87%) as a pale yellow oil.

<sup>1</sup>H NMR (400 MHz, CDCl<sub>3</sub>) δ 7.93 (d, *J* = 8.3 Hz, 2H), 7.70 (d, *J* = 9.4 Hz, 1H), 7.55 – 7.43 (m, 6H), 7.29 – 7.25 (m, 1H), 7.07 (d, *J* = 9.4 Hz, 1H), 2.72 (s, 3H), 2.36 – 2.31 (m, 2H), 1.70 – 1.62 (m, 2H), 0.82 (t, *J* = 7.3 Hz, 3H); <sup>13</sup>C NMR (100 MHz, CDCl<sub>3</sub>) δ 197.4, 195.7, 153.4, 141.3, 137.6, 136.0, 132.6, 132.0, 129.4, 128.7, 126.7, 125.4, 124.3, 123.1, 119.7, 106.7, 42.7, 20.1, 17.3, 14.0; IR (neat): 3444(br), 2066, 1633, 1447, 1375, 1345, 1323, 1264, 1230, 1196, 1156, 1041, 1021, 523, 499; HRMS (ESI) *m/z*: [M + H]<sup>+</sup> calcd for C<sub>22</sub>H<sub>22</sub>NO<sub>2</sub> 332.1645, found 332.1644.

## Synthetic Applications

*tert*-butyl 4-methyl-11-oxo-5,11-dihydro-6*H*-benzo[6,7]azepino[2,3-*b*]quinoline-6-carboxylate (**6**)

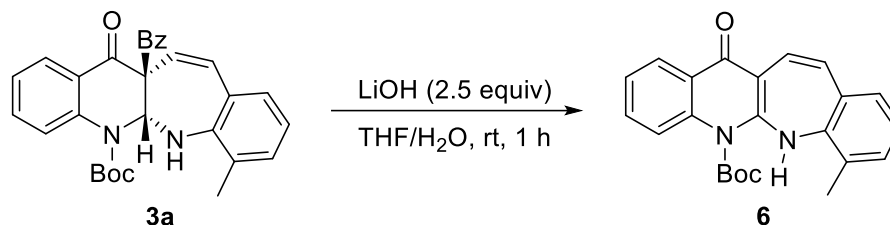

**Supplementary Figure 78.** Synthesis of compound **6**.

LiOH (0.5 mmol, 12.0 mg) was added to a solution of the compound **3a** (0.2 mmol, 96.2 mg) in THF/H<sub>2</sub>O (4.0 mL/1.0 mL) at room temperature. The reaction mixture was stirred at room temperature and the progress of the reaction was monitored by TLC. Upon completion, the mixture was then concentrated and the residue was purified by chromatography on silica gel (eluent: petroleum ether/ethyl acetate) to afford the desired product **6** (74.1 mg, 99% yield, yellow oil). <sup>1</sup>H NMR (400 MHz, CDCl<sub>3</sub>) δ 14.69 (s, 1H), 7.92 – 7.87 (m, 2H), 7.73 (d, *J* = 9.5 Hz, 1H), 7.61 (d, *J* = 7.7 Hz, 1H), 7.48 – 7.46 (m, 2H), 7.23 – 7.18 (m, 2H), 7.12 (t, *J* = 7.8 Hz, 1H), 2.70 (s, 3H), 1.73 (s, 9H); <sup>13</sup>C NMR (100 MHz, CDCl<sub>3</sub>) δ 168.6, 149.6, 148.5, 138.5, 136.3, 133.0, 132.6, 125.7, 125.6, 125.2, 123.6, 123.2, 122.2, 118.0, 117.1, 114.6, 89.7, 83.7, 28.3, 17.0; IR (neat): 3444(br), 2850, 2065, 1845, 1634, 1508, 1489, 1458, 1400, 1368, 1316, 1260, 1021, 508, 499; HRMS (ESI) *m/z*: [M + H]<sup>+</sup> calcd for C<sub>23</sub>H<sub>23</sub>N<sub>2</sub>O<sub>3</sub> 375.1703, found 375.1696.

*tert*-butyl 11a-benzoyl-4-methyl-11-oxo-5,6,11,11a-tetrahydro-5*aH*-benzo[6,7]azepino[2,3-*b*]quinoline-5*a*-carboxylate (**7**)

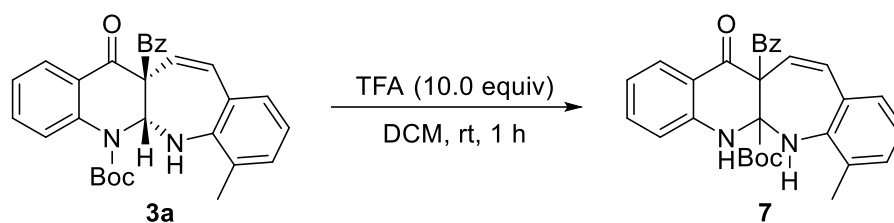

**Supplementary Figure 79.** Synthesis of compound **7**.

TFA (2.0 mmol, 228.0 mg) was added dropwise to a solution of compound **3a** (0.2 mmol, 96.2 mg) in DCM (4.0 mL) at 0 °C. The reaction mixture was stirred at room temperature and the progress of the reaction was monitored by TLC. Upon completion, the mixture was then concentrated and the residue was purified by chromatography on silica gel (eluent: petroleum ether/ethyl acetate) to afford the desired product **7** (64.6 mg, 67% yield, yellow oil). <sup>1</sup>H NMR (400 MHz, CDCl<sub>3</sub>) δ 10.74 (s, 1H), 8.56 (d, *J* = 7.4 Hz, 1H), 8.21 (s, 1H), 8.02 (d, *J* = 6.2 Hz, 2H), 7.89 (d, *J* = 6.5 Hz, 1H), 7.77 (s, 1H), 7.58 – 7.42 (m, 6H), 6.97 (t, *J* = 5.9 Hz, 1H), 6.86 (s, 1H), 2.87 (s, 3H), 1.48 (s, 9H); <sup>13</sup>C NMR (100 MHz, CDCl<sub>3</sub>) δ 196.7, 193.0, 152.9, 143.4, 137.5, 135.7, 135.2, 134.0, 130.7, 130.1, 129.2, 128.9, 127.0, 126.5, 121.2, 119.8, 119.5, 80.9, 60.7, 28.2; IR (neat): 3446(br), 2957, 2925, 2854, 1867, 1703, 1658, 1646, 1558, 1526, 1464, 1368, 1023, 662, 457; HRMS (ESI) *m/z*: [M + H]<sup>+</sup> calcd for C<sub>30</sub>H<sub>29</sub>N<sub>2</sub>O<sub>4</sub> 481.2122, found 481.2123.

**tert-butyl 11-(benzyloxy)-4-methyl-5,5a-dihydro-6H-benzo[6,7]azepino[2,3-*b*]quinoline-6-carboxylate (8)**

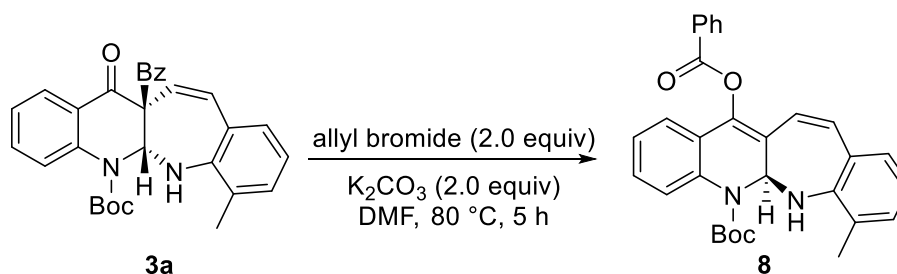

**Supplementary Figure 80.** Synthesis of compound **8**.

Allyl bromide (0.4 mmol, 48.4 mg), K<sub>2</sub>CO<sub>3</sub> (0.4 mmol, 55.2 mg) was added to a solution of compound **3a** (0.2 mmol, 96.2 mg) in DMF (2.0 mL) at room temperature.

The reaction mixture was stirred at room temperature 80 °C and the progress of the reaction was monitored by TLC. Upon completion, the mixture was then concentrated and the residue was purified by chromatography on silica gel (eluent: petroleum ether/ethyl acetate) to afford the desired product **8** (82.7 mg, 86% yield) as a yellow solid (mp 131-133 °C). <sup>1</sup>H NMR (400 MHz, CDCl<sub>3</sub>) δ 8.31 (d, *J* = 7.5 Hz, 2H), 8.02 (d, *J* = 8.3 Hz, 1H), 7.70 (t, *J* = 7.4 Hz, 1H), 7.59 – 7.55 (m, 2H), 7.33 – 7.29 (m, 2H), 7.22 (d, *J* = 7.8 Hz, 1H), 7.11 – 7.05 (m, 2H), 6.83 (t, *J* = 7.5 Hz, 1H), 6.71 (d, *J* = 11.9 Hz, 1H), 6.58 (d, *J* = 11.9 Hz, 1H), 5.21 (s, 1H), 4.49 (s, 1H), 2.31 (s, 3H), 1.40 (s, 9H); <sup>13</sup>C NMR (100 MHz, CDCl<sub>3</sub>) δ 164.3, 153.1, 146.2, 136.7, 134.0, 133.6, 132.6(4), 132.5(7), 130.4, 129.6, 128.8, 127.6, 124.2, 124.0, 123.9, 123.5, 122.4, 121.5, 120.8, 119.8, 118.4, 82.9, 66.7, 28.0, 18.0; IR (neat): 3446(br), 2920, 2849, 2064, 1867, 1790, 1770, 1738, 1704, 1646, 1558, 1540, 1338, 516, 446; HRMS (ESI) *m/z*: [M + H]<sup>+</sup> calcd for C<sub>30</sub>H<sub>29</sub>N<sub>2</sub>O<sub>4</sub> 481.2122, found 481.2124.

## Computational Studies

All structures were optimized at B3LYP<sup>5</sup> level of theory in gas phase with Def2SVP<sup>6</sup> basis set for all atoms. Empirical dispersion correction has been considered by using Grimme's DFT empirical dispersion correction with the Becke-Jonson (D3BJ) damping function.<sup>7</sup> Optimized minima and transition states (TSs) were verified at the same level of theory by harmonic vibrational analysis to have no and one proper imaginary frequency, respectively. To refine the calculated energy, single point calculation with larger basis set were then done based on these optimized structures, by using the Def2TZVP basis set for all atoms. The solvent effect was modelled in these single point calculations by employing SMD continuum solvation model,<sup>8</sup> taking toluene as the solvent for each reaction. The reported free energies in this work were based on the electronic energy of single point calculations, including the Gibbs free energy thermal correction obtained from vibrational analysis in gas phase at 120 °C, as well as DFT-D3(BJ) empirical dispersion correction.<sup>7</sup>

### Cartesian coordinates for the optimized structures

|    |             |             |             |   |             |             |             |
|----|-------------|-------------|-------------|---|-------------|-------------|-------------|
| A  |             |             |             | F | -3.56795000 | -4.96159100 | 2.82549900  |
| O  | 0.47805900  | 1.71267400  | -1.60283400 | F | -4.54414800 | -3.46639500 | 4.05290600  |
| C  | 0.76102000  | 0.51471300  | -1.72366200 | F | -5.03846000 | -3.62792000 | 1.95378300  |
| C  | -0.22990700 | -0.48952100 | -1.42024800 | C | -1.67154000 | -2.92154100 | 3.10000000  |
| Cu | -2.13950900 | -0.16366100 | 1.42297800  | C | -0.71194500 | -1.90487000 | 3.16988100  |
| O  | -1.09638900 | 1.47156800  | 1.17383100  | C | 0.53691700  | -2.19463900 | 4.02647300  |
| C  | -1.34428100 | 2.38345000  | 0.34393300  | F | 0.20663700  | -2.08073400 | 5.32584200  |
| C  | -0.40516700 | 3.60293700  | 0.44359300  | F | 0.98296200  | -3.44515600 | 3.83575200  |
| F  | 0.84218400  | 3.23900000  | 0.74691100  | F | 1.53048500  | -1.34670100 | 3.78441800  |
| F  | -0.38073200 | 4.32034500  | -0.67911300 | O | -0.80720200 | -0.73303400 | 2.72154400  |
| F  | -0.85290700 | 4.39619800  | 1.43252800  | C | -1.01407200 | -1.38673100 | -1.16522900 |
| C  | -2.42135900 | 2.45139000  | -0.55190800 | C | -1.87163200 | -2.49576700 | -0.90818900 |
| C  | -3.38873100 | 1.45026000  | -0.58853300 | C | -3.22263300 | -2.47467900 | -1.31094000 |
| C  | -4.54697100 | 1.57307700  | -1.59552200 | C | -4.02452300 | -3.59079200 | -1.09173100 |
| F  | -4.51361700 | 0.54071100  | -2.45579300 | C | -3.49821100 | -4.72594000 | -0.46720900 |
| F  | -5.72023800 | 1.54403200  | -0.96036200 | C | -2.16442400 | -4.74225800 | -0.04732000 |
| F  | -4.48652100 | 2.70114000  | -2.31197900 | C | -1.34736000 | -3.63490000 | -0.26284700 |
| O  | -3.45885400 | 0.40480000  | 0.11705100  | O | 1.11932600  | -2.19875800 | 1.02884600  |
| O  | -3.29858200 | -1.66679300 | 1.88849400  | N | 2.10816500  | -1.38861800 | 0.93727500  |
| C  | -2.92916700 | -2.67808400 | 2.53872000  | C | 1.90412200  | -0.07087800 | 1.15511100  |
| C  | -4.04293100 | -3.70514600 | 2.83041300  | C | 2.93557700  | 0.86880500  | 1.07073000  |

C 4.20258600 0.46268400 0.73000600  
 C 4.44996400 -0.911171500 0.48878300  
 C 3.38942300 -1.86638900 0.60508900  
 C 3.63654300 -3.25887600 0.38173400  
 C 2.60535400 -4.35292400 0.50729300  
 C 4.93011800 -3.62214300 0.02689500  
 C 5.97922100 -2.69072500 -0.11425600  
 C 5.74402300 -1.35670500 0.11644200  
 N 3.02348500 2.26379100 -1.97940900  
 H 2.04160100 2.52536900 -1.84419000  
 C 3.89895900 3.23801900 -1.54414300  
 O 5.17541500 2.82008900 -1.50841300  
 C 6.25977000 3.70743300 -1.07329900  
 C 6.03823100 4.13722400 0.37798700  
 C 7.49333200 2.81439300 -1.19183400  
 C 6.35986700 4.90408400 -2.01964100  
 O 3.50788700 4.33736300 -1.21821300  
 C 3.20396900 0.92181900 -2.29357900  
 C 4.43268800 0.39648100 -2.73679700  
 C 4.56899500 -0.95845600 -3.01495600  
 C 3.49060200 -1.83872400 -2.86915400  
 C 2.26739300 -1.33422200 -2.45546900  
 C 2.08875400 0.03457400 -2.16950600  
 H -2.48857700 3.29271500 -1.23483400  
 H -1.47205600 -3.88032300 3.57208100  
 H -3.62974800 -1.58027400 -1.77899100  
 H -5.07279700 -3.57023500 -1.39614700  
 H -4.13743300 -5.59205000 -0.28336900  
 H -1.76281300 -5.61910500 0.46459800  
 H -0.31458000 -3.60808800 0.08251500  
 H 0.88328500 0.19136200 1.41622300  
 H 2.69191500 1.91431500 1.25192300  
 H 5.01550600 1.17728100 0.61210800  
 H 1.81463200 -4.24645200 -0.24808200  
 H 3.09266400 -5.32933600 0.36871100  
 H 2.10423900 -4.32892700 1.48231400  
 H 5.13674700 -4.68062600 -0.14679300  
 H 6.97435100 -3.03747300 -0.40158600  
 H 6.53778300 -0.61405900 0.01561300  
 H 5.94624000 3.25788000 1.03422000  
 H 6.90286400 4.72507300 0.72163100  
 H 5.13293100 4.74829700 0.47338800  
 H 7.63548700 2.48244900 -2.23124200  
 H 8.39156000 3.36539300 -0.87679900

H 7.39081400 1.92354400 -0.55376700  
 H 5.46836600 5.53849700 -1.94543900  
 H 7.24642000 5.50377400 -1.76306500  
 H 6.46763500 4.55937400 -3.05955900  
 H 5.27994400 1.06526800 -2.84744900  
 H 5.53858600 -1.33527800 -3.34809400  
 H 3.60830300 -2.90389100 -3.07200100  
 H 1.41545100 -2.00294600 -2.33346500

**TS<sub>B1</sub>**

O 1.44206100 1.25020700 -3.68664500  
 C 1.77902300 1.25910000 -2.51364500  
 C 1.94179800 -0.05870800 -1.81372100  
 Cu 0.00934500 -0.32739300 -1.00106100  
 O -1.77637800 -0.79581500 -0.15854400  
 C -2.76684400 -1.15825500 -0.82901200  
 C -4.07970200 -1.19797300 -0.02149300  
 F -4.24970200 -0.06516600 0.65618200  
 F -5.15585900 -1.39436000 -0.79314200  
 F -4.03015100 -2.21204700 0.86819400  
 C -2.79424100 -1.58174600 -2.16862900  
 C -1.61628900 -1.70708300 -2.91112800  
 C -1.67680700 -2.43092800 -4.26873800  
 F -2.92966800 -2.60441700 -4.70670600  
 F -0.99205400 -1.77427600 -5.19893200  
 F -1.12179500 -3.65537600 -4.12958200  
 O -0.44613800 -1.37593500 -2.58948400  
 O 0.51924100 0.51392700 0.67503300  
 C 0.10149000 1.63057200 1.09627400  
 C 0.56000300 1.92787900 2.53724400  
 F 0.50617400 3.23087200 2.84184000  
 F -0.22122900 1.27319700 3.41352300  
 F 1.82133700 1.51533800 2.73579400  
 C -0.71114900 2.57229600 0.47654900  
 C -1.23139500 2.42425700 -0.83228800  
 C -2.22039400 3.52029800 -1.29525600  
 F -2.27677900 3.59289100 -2.62483500  
 F -3.45181500 3.23257200 -0.84208000  
 F -1.88986200 4.73737600 -0.82540100  
 O -1.03437600 1.50505900 -1.64045000  
 C 2.88437700 -0.88729700 -1.86594700  
 C 4.04714000 -1.56324700 -2.31737000  
 C 5.14297000 -1.82212600 -1.46822900  
 C 6.28072200 -2.43787700 -1.97809300

C 6.33893100 -2.80024100 -3.33049000  
 C 5.25555300 -2.54694700 -4.17836100  
 C 4.10816200 -1.93557400 -3.67769800  
 O 2.53969600 -2.69773700 -0.49877200  
 N 1.33407500 -3.04752500 -0.20152500  
 C 0.62614100 -3.73347100 -1.12267800  
 C -0.67755700 -4.17115800 -0.88477800  
 C -1.27787800 -3.87917600 0.31844500  
 C -0.57161000 -3.13608100 1.29617600  
 C 0.77393800 -2.70912800 1.04288500  
 C 1.50343300 -1.96819300 2.02395800  
 C 2.91087900 -1.45743600 1.85602700  
 C 0.83601200 -1.67173200 3.20428300  
 C -0.49710300 -2.05350200 3.45594100  
 C -1.19326300 -2.77731600 2.51898800  
 C 1.98480600 2.47955600 -1.70408900  
 C 2.65135100 2.38091100 -0.47008300  
 C 2.81759400 3.48068800 0.35917100  
 C 2.28979600 4.71131500 -0.04762200  
 C 1.62896500 4.84881200 -1.26230700  
 C 1.47297600 3.74640400 -2.12940900  
 N 0.85317600 3.82388900 -3.36647600  
 C 0.10560800 4.80677800 -3.99398500  
 O -0.12513600 5.86577500 -3.20958600  
 C -0.90989000 7.01622100 -3.67306400  
 C -2.32831900 6.57890500 -4.03991700  
 C -0.92714800 7.92231500 -2.44356200  
 C -0.19062500 7.68622100 -4.84389100  
 O -0.28035100 4.66629700 -5.13260500  
 H -3.73710700 -1.88452000 -2.61390200  
 H -0.94178700 3.48419600 1.02024900  
 H 5.07708200 -1.54327400 -0.41675100  
 H 7.13013000 -2.64028700 -1.32211800  
 H 7.23604800 -3.28374600 -3.72451400  
 H 5.30600000 -2.82848600 -5.23237900  
 H 3.25136300 -1.72551100 -4.32064700  
 H 1.16275700 -3.89692500 -2.05485000  
 H -1.19704900 -4.70796800 -1.67811200  
 H -2.30635100 -4.17735200 0.52396200  
 H 2.95970900 -0.73862800 1.02855400  
 H 3.22249800 -0.94770500 2.77778600  
 H 3.61595200 -2.26547800 1.62570900  
 H 1.36605200 -1.08715000 3.95766500  
 H -0.97159700 -1.75979500 4.39424000

H -2.23027200 -3.07281800 2.68216800  
 H 3.02051300 1.40513000 -0.15786100  
 H 3.32904800 3.37803300 1.31670500  
 H 2.39305700 5.58761600 0.59711100  
 H 1.22643200 5.81039100 -1.55985200  
 H 0.92365600 2.96777700 -3.92355100  
 H -2.80439300 6.07291800 -3.18917700  
 H -2.92562100 7.46732900 -4.29617700  
 H -2.32027900 5.89544100 -4.89721500  
 H 0.09388300 8.23182000 -2.17250400  
 H -1.52095500 8.82574800 -2.64672700  
 H -1.37124000 7.39111900 -1.58927800  
 H -0.16626600 7.02462900 -5.71864600  
 H -0.71421700 8.61576000 -5.11514600  
 H 0.84198900 7.94345300 -4.56134200

**B1**

O 1.35025600 0.78101300 -3.61609800  
 C 1.66431300 0.81455600 -2.42314100  
 C 1.62670900 -0.42404500 -1.62054000  
 Cu -0.26829600 -0.35553200 -0.88885100  
 O -2.05016600 -0.83614900 0.06097800  
 C -3.08310700 -1.21706100 -0.52493900  
 C -4.29967300 -1.41723900 0.40248000  
 F -4.37968500 -0.45784000 1.31739900  
 F -5.45983300 -1.47241900 -0.26038600  
 F -4.15712500 -2.59984800 1.05729900  
 C -3.23201900 -1.57461000 -1.87784500  
 C -2.13052100 -1.63218700 -2.73973000  
 C -2.32856900 -2.24365100 -4.14003400  
 F -3.61682100 -2.45227000 -4.44092300  
 F -1.79309200 -1.48011200 -5.08339800  
 F -1.70739200 -3.44810800 -4.17692500  
 O -0.93591400 -1.32915900 -2.50362600  
 O 0.32068800 0.39864200 0.84220700  
 C 0.08887200 1.56939900 1.25416500  
 C 0.66212200 1.80969800 2.66276600  
 F 0.65293100 3.09391700 3.03351600  
 F -0.05013400 1.11608300 3.57202600  
 F 1.93240400 1.37168900 2.74443800  
 C -0.61164100 2.60693600 0.65019600  
 C -1.23219900 2.49761500 -0.61909700  
 C -2.07337000 3.71755600 -1.06496400  
 F -2.24088500 3.73324100 -2.38686200

F -3.28952400 3.65944200 -0.49397500  
 F -1.51362600 4.88518000 -0.69949200  
 O -1.23544600 1.53242600 -1.39639900  
 C 2.61847900 -1.29952300 -1.52028000  
 C 3.99236900 -1.25498200 -2.06641100  
 C 5.08142200 -1.76434300 -1.33512200  
 C 6.37765500 -1.68549200 -1.84503700  
 C 6.60900000 -1.10278600 -3.09387100  
 C 5.53126000 -0.60863600 -3.83369800  
 C 4.23195400 -0.68775300 -3.33188000  
 O 2.51203400 -2.52741900 -0.73994800  
 N 1.25025700 -2.92342600 -0.41901700  
 C 0.57319300 -3.53357300 -1.39585300  
 C -0.69850100 -4.05461800 -1.16532700  
 C -1.26273200 -3.88029400 0.08022000  
 C -0.56247900 -3.20775600 1.10837600  
 C 0.76850000 -2.71858300 0.86739400  
 C 1.50377400 -2.05984500 1.89615700  
 C 2.89656800 -1.51058500 1.75357200  
 C 0.84528500 -1.88615200 3.10625500  
 C -0.47392000 -2.31835900 3.34867200  
 C -1.17118800 -2.97805500 2.36693900  
 C 1.95315700 2.08897400 -1.70846900  
 C 2.64773100 2.04386300 -0.48824800  
 C 2.90877600 3.18930300 0.25239900  
 C 2.44706300 4.41733300 -0.23170900  
 C 1.76160300 4.50497700 -1.43817200  
 C 1.51603400 3.35300800 -2.21500800  
 N 0.87817300 3.37591200 -3.44700700  
 C 0.19873900 4.35509300 -4.14486900  
 O 0.05538000 5.49088200 -3.44727800  
 C -0.61701500 6.66484000 -4.01046600  
 C -2.06521400 6.33342100 -4.37399000  
 C -0.56836300 7.66183400 -2.85383700  
 C 0.17521900 7.17589100 -5.21439700  
 O -0.21152800 4.15850700 -5.26787800  
 H -4.21060800 -1.86736600 -2.24707600  
 H -0.67345100 3.55762000 1.17236700  
 H 4.91326200 -2.21818900 -0.35895300  
 H 7.21252300 -2.07956600 -1.26053800  
 H 7.62457800 -1.04067500 -3.49182300  
 H 5.69907800 -0.16539800 -4.81803100  
 H 3.39399300 -0.32521000 -3.92573300  
 H 1.08023300 -3.56871800 -2.35898800

H -1.23001900 -4.52596400 -1.98979600  
 H -2.27747600 -4.22586300 0.28293200  
 H 2.92731600 -0.73104800 0.98244100  
 H 3.20504400 -1.05439400 2.70185300  
 H 3.62158400 -2.28831800 1.48151700  
 H 1.37449500 -1.35418000 3.89804400  
 H -0.93585900 -2.11453200 4.31608500  
 H -2.19791200 -3.31093500 2.51785500  
 H 2.97433300 1.07385500 -0.11900400  
 H 3.44523000 3.12432500 1.19981700  
 H 2.62361100 5.33129900 0.34108900  
 H 1.41191000 5.46551200 -1.79896700  
 H 0.90402100 2.47304700 -3.93506800  
 H -2.59582600 5.92808000 -3.50189700  
 H -2.57618500 7.25311200 -4.69823800  
 H -2.10725400 5.59624800 -5.18439400  
 H 0.47305800 7.89977200 -2.58800100  
 H -1.07671400 8.59583400 -3.13580400  
 H -1.06640700 7.23838300 -1.96982500  
 H 0.15413800 6.44613300 -6.03343900  
 H -0.26058200 8.12233700 -5.56976100  
 H 1.22224500 7.36438500 -4.93052500

**TS<sub>c1</sub>**

O -0.18287100 0.39847600 -0.92736300  
 C 0.55362700 -0.62808800 -0.96711400  
 C 0.57884800 -1.60640600 0.01712000  
 Cu -1.48248000 0.86610200 0.76370300  
 O -0.14158900 2.15850100 1.41010100  
 C -0.08205700 3.37046000 1.06940200  
 C 1.02023800 4.15551100 1.80571200  
 F 2.16854700 3.45933600 1.84629500  
 F 1.27713700 5.34537400 1.25915700  
 F 0.63307200 4.36121200 3.07447200  
 C -0.92598400 4.07006700 0.20383900  
 C -2.04922200 3.46085400 -0.37419300  
 C -2.95348500 4.30621900 -1.29387100  
 F -2.98991000 3.76950600 -2.51739000  
 F -4.19995400 4.33602800 -0.81067200  
 F -2.52631500 5.57234800 -1.41084600  
 O -2.44645200 2.27972000 -0.23560100  
 O -2.85121000 -0.44045900 0.21249300  
 C -3.12786400 -1.52039800 0.78333800  
 C -4.23712800 -2.32132900 0.07016200



F -4.43275800 -3.52843400 0.62011300  
 F -5.39106100 -1.64936500 0.13035900  
 F -3.92549100 -2.50102600 -1.21906000  
 C -2.57520100 -2.04128700 1.96371800  
 C -1.59673900 -1.33885000 2.67000500  
 C -1.09474900 -1.94229000 3.99777200  
 F -1.79699800 -1.43399800 5.01953600  
 F -1.23323700 -3.27670000 4.02821100  
 F 0.19453200 -1.65713000 4.20025000  
 O -1.07605000 -0.22962200 2.38009800  
 C 0.53786400 -2.75932700 0.62540400  
 C -0.30068900 -3.94737400 0.43387100  
 C -1.15081800 -4.01323800 -0.68510600  
 C -1.99632100 -5.10379700 -0.86643400  
 C -2.01427000 -6.14387600 0.06973700  
 C -1.17887000 -6.08196200 1.18703600  
 C -0.32390800 -4.99308200 1.37192200  
 O 1.44990900 -2.92922700 1.77370000  
 N 2.46506000 -2.01316600 1.66204200  
 C 1.96423700 -0.74745100 1.57545400  
 C 2.76765900 0.30652700 1.06423500  
 C 3.90564300 -0.00804700 0.38386400  
 C 4.33653600 -1.37281400 0.27221400  
 C 3.60293900 -2.40441500 0.92757600  
 C 4.04053400 -3.75019600 0.87817400  
 C 3.38262200 -4.87771500 1.63298000  
 C 5.16982200 -4.02355000 0.10101300  
 C 5.87954300 -3.02871300 -0.58647600  
 C 5.47485600 -1.71022600 -0.48756300  
 N 1.88587900 1.68552400 -1.97776900  
 H 0.91904800 1.66349700 -1.63923100  
 C 2.58027100 2.80455600 -1.59055700  
 O 3.90390400 2.68804300 -1.78913600  
 C 4.82880500 3.79151200 -1.50278700  
 C 4.80334300 4.13272100 -0.01275400  
 C 6.18120700 3.20395100 -1.90142200  
 C 4.47778800 4.99684300 -2.37487600  
 O 2.02508300 3.76952700 -1.10341300  
 C 2.34846600 0.43462900 -2.40346400  
 C 3.46952600 0.28820700 -3.24138300  
 C 3.88830500 -0.97418800 -3.64855600  
 C 3.20069600 -2.12356800 -3.23920500  
 C 2.09718100 -1.98998700 -2.40692100  
 C 1.65204400 -0.72849800 -1.97804500

H -0.70418500 5.10807400 -0.02178500  
 H -2.90257700 -3.01224600 2.32245700  
 H -1.16240100 -3.18542500 -1.39636800  
 H -2.66224000 -5.13053600 -1.73108000  
 H -2.68635300 -6.99385900 -0.06770900  
 H -1.19622600 -6.88410000 1.92858600  
 H 0.30561400 -4.93651400 2.25836400  
 H 1.09144300 -0.53940200 2.19312500  
 H 2.39165500 1.32273800 1.15887000  
 H 4.49401900 0.76856000 -0.10622200  
 H 2.45922700 -5.21595900 1.14126000  
 H 4.07060800 -5.73301200 1.69190200  
 H 3.10716200 -4.57821800 2.65349200  
 H 5.51566000 -5.05865800 0.04653400  
 H 6.75473700 -3.29726900 -1.18129600  
 H 6.01560600 -0.91167900 -0.99856500  
 H 4.97030500 3.22973900 0.59470800  
 H 5.61164500 4.84579800 0.21046200  
 H 3.84683700 4.57761600 0.27975500  
 H 6.18275200 2.91485100 -2.96299100  
 H 6.97784200 3.94502500 -1.74081900  
 H 6.41126800 2.31241700 -1.29815300  
 H 3.49513000 5.40203800 -2.10426700  
 H 5.23541700 5.78335700 -2.23810700  
 H 4.46728600 4.71114700 -3.43802800  
 H 4.00147400 1.17750800 -3.56930400  
 H 4.75965300 -1.06162400 -4.30218100  
 H 3.53138700 -3.11283700 -3.56041600  
 H 1.56580000 -2.87590600 -2.05564300

**TS<sub>F1</sub>**

O 1.46420900 0.97048700 -3.54450900  
 C 1.82647200 1.18398300 -2.38265100  
 C 1.79339800 0.05727600 -1.45249700  
 Cu 0.02814800 -0.06720500 -0.49472400  
 O -1.52924500 -0.65631700 0.67706400  
 C -2.61923900 -1.06550500 0.23011400  
 C -3.77037300 -1.16841500 1.25527000  
 F -3.32575700 -1.07542700 2.50693000  
 F -4.65848300 -0.18682400 1.04910700  
 F -4.42619500 -2.34000600 1.13439500  
 C -2.92848500 -1.42226100 -1.09656500  
 C -1.94611200 -1.45193000 -2.08904800  
 C -2.35156300 -1.94228100 -3.49390300

|   |             |             |             |           |             |             |             |
|---|-------------|-------------|-------------|-----------|-------------|-------------|-------------|
| F | -3.68112100 | -2.00086400 | -3.65259800 | O         | -0.05898600 | 5.65074900  | -3.67977000 |
| F | -1.85034600 | -1.15238100 | -4.43632500 | C         | -0.88280800 | 6.72693800  | -4.24224900 |
| F | -1.87291300 | -3.19046700 | -3.70165400 | C         | -2.32562600 | 6.25639000  | -4.43085600 |
| O | -0.72332800 | -1.17168900 | -1.98512200 | C         | -0.80461700 | 7.80217100  | -3.16007500 |
| O | 0.78702400  | 0.84237000  | 1.09527600  | C         | -0.25897700 | 7.20999600  | -5.55163500 |
| C | 0.58681100  | 2.04390000  | 1.42947700  | O         | -0.39522000 | 4.16618100  | -5.36680700 |
| C | 1.34002700  | 2.41081200  | 2.72185100  | H         | -3.94480700 | -1.71711000 | -1.34483300 |
| F | 1.30137000  | 3.71928700  | 3.00576300  | H         | -0.19705300 | 4.01719700  | 1.25791000  |
| F | 0.81564400  | 1.74742100  | 3.76319500  | H         | 4.84628400  | -2.22857400 | -0.17776500 |
| F | 2.63248700  | 2.05314700  | 2.62808000  | H         | 6.95371100  | -2.82643700 | -1.36559800 |
| C | -0.19134000 | 3.02323300  | 0.81953800  | H         | 7.25737400  | -2.19026500 | -3.75834100 |
| C | -0.94462200 | 2.80651700  | -0.36066600 | H         | 5.43886000  | -0.97353700 | -4.95620800 |
| C | -1.80786100 | 3.99734600  | -0.84387700 | H         | 3.33264000  | -0.40450900 | -3.77963600 |
| F | -2.06289300 | 3.90507300  | -2.15014300 | H         | 2.14740600  | -3.07565700 | -2.20509800 |
| F | -2.98199400 | 4.00337800  | -0.19161400 | H         | 0.30069100  | -4.61267400 | -2.98875700 |
| F | -1.21630400 | 5.18545500  | -0.61901500 | H         | -1.58681400 | -5.07438300 | -1.39691900 |
| O | -1.04200600 | 1.77106400  | -1.03555800 | H         | 1.71958400  | -0.94253100 | 2.22541600  |
| C | 2.71451700  | -0.91827500 | -1.15618100 | H         | 1.72206600  | -2.01279700 | 3.65209200  |
| C | 3.96240100  | -1.25555700 | -1.88884800 | H         | 2.69764700  | -2.41874600 | 2.20924800  |
| C | 4.98543900  | -1.95608600 | -1.22487900 | H         | -0.47886200 | -2.61488600 | 3.86233000  |
| C | 6.16270100  | -2.28896900 | -1.89408200 | H         | -2.49873200 | -3.83032400 | 3.11945200  |
| C | 6.33417200  | -1.93033100 | -3.23507000 | H         | -2.62205200 | -4.75976600 | 0.80871600  |
| C | 5.31691500  | -1.24439200 | -3.90492100 | H         | 3.23709200  | 1.66702700  | -0.18474100 |
| C | 4.13440000  | -0.91155800 | -3.24219300 | H         | 3.72862900  | 3.84466900  | 0.89592000  |
| O | 2.45948900  | -1.58886300 | -0.03997000 | H         | 2.81549300  | 5.94091600  | -0.12703300 |
| N | 1.41779300  | -3.00099700 | -0.28889800 | H         | 1.47967300  | 5.85172900  | -2.19260100 |
| C | 1.36691200  | -3.43072100 | -1.52648500 | H         | 0.93119500  | 2.66627600  | -4.02403100 |
| C | 0.31639300  | -4.25542200 | -1.96018600 | H         | -2.72822700 | 5.86672300  | -3.48618000 |
| C | -0.71179200 | -4.50455700 | -1.07809500 | H         | -2.94427600 | 7.10926600  | -4.74978500 |
| C | -0.67683200 | -3.99336000 | 0.24263500  | H         | -2.38650800 | 5.46810000  | -5.19043000 |
| C | 0.46888800  | -3.22687200 | 0.66639400  | H         | 0.23349400  | 8.14133400  | -3.02154500 |
| C | 0.56398000  | -2.74283500 | 2.00952200  | H         | -1.41828000 | 8.67034400  | -3.44252900 |
| C | 1.74768000  | -1.99152300 | 2.55379100  | H         | -1.17168600 | 7.40221200  | -2.20395600 |
| C | -0.52088800 | -2.99155600 | 2.83831100  | H         | -0.29763900 | 6.42347900  | -6.31578600 |
| C | -1.67072900 | -3.69451700 | 2.42216700  | H         | -0.80769000 | 8.09036000  | -5.92000600 |
| C | -1.74660200 | -4.20320300 | 1.14716500  | H         | 0.79056900  | 7.50138300  | -5.39089300 |
| C | 2.12353000  | 2.51715100  | -1.82352000 |           |             |             |             |
| C | 2.87827000  | 2.59161600  | -0.63875000 | <b>C1</b> |             |             |             |
| C | 3.14736900  | 3.80731300  | -0.02572200 | O         | 2.20543400  | 0.40239800  | 0.85182600  |
| C | 2.62970500  | 4.97351200  | -0.60030700 | C         | 2.33372000  | -0.53093700 | 0.01991600  |
| C | 1.87458800  | 4.93587200  | -1.76764100 | C         | 1.93867400  | -1.86288200 | 0.46567900  |
| C | 1.61623000  | 3.71201700  | -2.41877600 | Cu        | 0.01268400  | 0.78845300  | 1.41351000  |
| N | 0.90431700  | 3.59945200  | -3.60419200 | O         | 0.28148500  | 2.71953300  | 1.72530500  |
| C | 0.09649400  | 4.47864300  | -4.30528000 | C         | 0.03070500  | 3.63147900  | 0.90573200  |

|   |             |             |             |   |             |             |             |
|---|-------------|-------------|-------------|---|-------------|-------------|-------------|
| C | 0.16277600  | 5.05171500  | 1.49446500  | H | 2.55806700  | 1.84839700  | -0.08782800 |
| F | 1.27232300  | 5.18173300  | 2.20639000  | C | 2.71687100  | 3.47439900  | -1.27161200 |
| F | 0.14542100  | 6.00128600  | 0.54528800  | O | 2.87361500  | 3.81942100  | -2.55133800 |
| F | -0.88847300 | 5.27442600  | 2.30247700  | C | 2.89396200  | 5.22528500  | -2.98486000 |
| C | -0.39973600 | 3.49442600  | -0.42947400 | C | 4.05795400  | 5.95595200  | -2.31685000 |
| C | -0.50091900 | 2.24245600  | -1.02446200 | C | 3.11291700  | 5.10250800  | -4.49113200 |
| C | -0.79357500 | 2.15154700  | -2.53278800 | C | 1.54627700  | 5.87978500  | -2.68442300 |
| F | 0.26225000  | 1.62593800  | -3.17146000 | O | 2.55120100  | 4.24415600  | -0.34617200 |
| F | -1.84435400 | 1.35498900  | -2.76080300 | C | 3.02396400  | 1.02082900  | -1.87590800 |
| F | -1.05200400 | 3.34687400  | -3.08328300 | C | 3.46190200  | 1.14612800  | -3.20958700 |
| O | -0.34978500 | 1.10988600  | -0.48521700 | C | 3.82093800  | 0.02631900  | -3.94941700 |
| O | -0.97436200 | -0.89895200 | 1.16476300  | C | 3.78014400  | -1.25653600 | -3.38969100 |
| C | -1.36600800 | -1.66613700 | 2.07993200  | C | 3.32569100  | -1.39906800 | -2.08994600 |
| C | -2.33086000 | -2.75915600 | 1.58128900  | C | 2.89679200  | -0.29559800 | -1.32074600 |
| F | -2.66239300 | -3.62789400 | 2.54914500  | H | -0.55974100 | 4.38611400  | -1.02578000 |
| F | -3.45794600 | -2.18608600 | 1.14315300  | H | -1.41552800 | -2.36778200 | 4.11619400  |
| F | -1.79199000 | -3.44637400 | 0.57199600  | H | -0.03812700 | -0.90808600 | -1.49511100 |
| C | -1.04715400 | -1.60205200 | 3.44080400  | H | -0.96890900 | -1.02956200 | -3.77869400 |
| C | -0.22516200 | -0.58139200 | 3.93717100  | H | -0.82416100 | -3.15686700 | -5.08287200 |
| C | 0.24541900  | -0.67010900 | 5.40192400  | H | 0.25066000  | -5.16366000 | -4.06763700 |
| F | 0.16573100  | 0.51372700  | 6.00424800  | H | 1.20767200  | -5.03330900 | -1.76954300 |
| F | -0.47043700 | -1.55265000 | 6.11266800  | H | 1.82597600  | -1.60739900 | 2.63211200  |
| F | 1.52646600  | -1.07077000 | 5.41927300  | H | 4.32983600  | -1.53823300 | 1.84902900  |
| O | 0.24744600  | 0.40568200  | 3.31877300  | H | 5.37021400  | -3.60904800 | 2.72693800  |
| C | 1.27846400  | -2.87185300 | -0.16486000 | H | -0.37964100 | -5.74351000 | 1.52321700  |
| C | 0.68080100  | -2.95374900 | -1.50316800 | H | -0.67570100 | -6.70610700 | 2.99918700  |
| C | 0.05459100  | -1.83020400 | -2.06664900 | H | -0.64900000 | -4.92145000 | 3.05268900  |
| C | -0.48143000 | -1.90748800 | -3.35107000 | H | 1.27525100  | -7.80374200 | 3.75354400  |
| C | -0.40406400 | -3.10073500 | -4.07573700 | H | 3.69491400  | -7.81370600 | 4.32191900  |
| C | 0.19878700  | -4.22754400 | -3.50697000 | H | 5.10641600  | -5.82433200 | 3.79029800  |
| C | 0.73417600  | -4.15955300 | -2.22102900 | H | 5.00358700  | 5.42642900  | -2.51011100 |
| O | 1.09634900  | -3.95077100 | 0.60939100  | H | 4.14114500  | 6.97032400  | -2.73584800 |
| N | 1.50700100  | -3.58784800 | 1.98316900  | H | 3.90636700  | 6.03195900  | -1.23329800 |
| C | 2.24466600  | -2.30685300 | 1.88941900  | H | 2.30248300  | 4.51685600  | -4.95009000 |
| C | 3.73350800  | -2.41887300 | 2.09995800  | H | 3.12914800  | 6.10050300  | -4.95304600 |
| C | 4.29002400  | -3.54163400 | 2.57322400  | H | 4.07058600  | 4.60479700  | -4.70620200 |
| C | 3.48139100  | -4.70958400 | 2.91284300  | H | 1.38543200  | 5.98159800  | -1.60544800 |
| C | 2.10400700  | -4.71621800 | 2.60015800  | H | 1.51828600  | 6.88085200  | -3.14090600 |
| C | 1.29150200  | -5.82793400 | 2.90180300  | H | 0.73030800  | 5.28227400  | -3.11718300 |
| C | -0.18096600 | -5.80860200 | 2.60274000  | H | 3.52526600  | 2.13382300  | -3.65087100 |
| C | 1.89359800  | -6.93546500 | 3.51282300  | H | 4.16168100  | 0.16275000  | -4.97886700 |
| C | 3.25370100  | -6.94090000 | 3.83527100  | H | 4.09892700  | -2.12895500 | -3.96216900 |
| C | 4.04209300  | -5.83134800 | 3.54230200  | H | 3.30437700  | -2.38596400 | -1.63414000 |
| N | 2.72979400  | 2.11004200  | -1.06455000 |   |             |             |             |

**TSd1**

|    |             |             |             |   |             |             |             |
|----|-------------|-------------|-------------|---|-------------|-------------|-------------|
| O  | 2.30986200  | 0.21474000  | 0.78350600  | C | 2.02892900  | -4.42473700 | 2.88125400  |
| C  | 2.37614900  | -0.72097800 | -0.08069800 | C | 1.21822500  | -5.54224900 | 3.34810700  |
| C  | 2.02118900  | -2.04786600 | 0.33896200  | C | -0.25745700 | -5.49284300 | 3.13225100  |
| Cu | 0.15850500  | 0.66686700  | 1.38571900  | C | 1.85560800  | -6.61451100 | 3.92575400  |
| O  | 0.46994400  | 2.56761000  | 1.77931200  | C | 3.27200600  | -6.65515600 | 4.05400100  |
| C  | 0.18041400  | 3.52262800  | 1.02207700  | C | 4.07321800  | -5.63172600 | 3.58812500  |
| C  | 0.37954500  | 4.90871700  | 1.66890200  | N | 2.65111400  | 1.96227400  | -1.13190600 |
| F  | 1.53019800  | 4.98139800  | 2.32166000  | H | 2.55817000  | 1.66478800  | -0.15266500 |
| F  | 0.33086800  | 5.90414400  | 0.76939500  | C | 2.68161000  | 3.32880800  | -1.29060800 |
| F  | -0.61866300 | 5.11428000  | 2.54693700  | O | 2.75104500  | 3.71529800  | -2.56846300 |
| C  | -0.34450400 | 3.45953900  | -0.28274800 | C | 2.82173300  | 5.13035300  | -2.95512400 |
| C  | -0.50268900 | 2.24025400  | -0.93356000 | C | 4.07336500  | 5.77054100  | -2.35541900 |
| C  | -0.88928600 | 2.23369500  | -2.42358600 | C | 2.92031400  | 5.05183400  | -4.47729900 |
| F  | 0.12558100  | 1.75974100  | -3.15768800 | C | 1.54173900  | 5.85071200  | -2.53283000 |
| F  | -1.94987600 | 1.44391500  | -2.62991700 | O | 2.62051900  | 4.07653900  | -0.33260100 |
| F  | -1.19106100 | 3.45822400  | -2.88354200 | C | 2.92567100  | 0.89395600  | -1.98411300 |
| O  | -0.33516200 | 1.08114200  | -0.46349400 | C | 3.27806500  | 1.05881500  | -3.33837400 |
| O  | -0.77510600 | -1.04987300 | 1.06932900  | C | 3.67152900  | -0.02791600 | -4.11013200 |
| C  | -1.32924000 | -1.75864200 | 1.94266700  | C | 3.76066700  | -1.30876800 | -3.55486600 |
| C  | -2.21916200 | -2.86735600 | 1.34948700  | C | 3.37659100  | -1.48947900 | -2.23584500 |
| F  | -2.76077700 | -3.64831500 | 2.29986800  | C | 2.88667500  | -0.43205800 | -1.44268400 |
| F  | -3.21932900 | -2.31583000 | 0.65490900  | H | -0.52731000 | 4.38262500  | -0.82186200 |
| F  | -1.51442000 | -3.64559800 | 0.52575400  | H | -1.73494400 | -2.33746200 | 3.98047500  |
| C  | -1.21556400 | -1.63681800 | 3.33456800  | H | -0.02350300 | -1.07431100 | -1.33419200 |
| C  | -0.35285300 | -0.68897700 | 3.89566100  | H | -1.06823500 | -0.88334100 | -3.55350800 |
| C  | -0.02898200 | -0.80188400 | 5.39637300  | H | -0.79247900 | -2.70708200 | -5.23810900 |
| F  | 0.02341200  | 0.39344700  | 5.97605700  | H | 0.51316600  | -4.74973300 | -4.64848500 |
| F  | -0.92499300 | -1.55111800 | 6.05581400  | H | 1.55961900  | -4.94139100 | -2.38477400 |
| F  | 1.17274100  | -1.39128500 | 5.52961900  | H | 1.70748500  | -1.38164300 | 2.37080700  |
| O  | 0.29209700  | 0.21779900  | 3.30747300  | H | 4.15155100  | -1.41325700 | 1.69805700  |
| C  | 1.54582600  | -3.18769700 | -0.39676000 | H | 5.33977400  | -3.46343000 | 2.53456800  |
| C  | 0.87918700  | -3.00700000 | -1.73345500 | H | -0.46894700 | -5.38276800 | 2.05770800  |
| C  | 0.12072200  | -1.87291400 | -2.05798600 | H | -0.74932800 | -6.39746900 | 3.51406700  |
| C  | -0.47913100 | -1.77041300 | -3.31404200 | H | -0.69571100 | -4.61046600 | 3.62006800  |
| C  | -0.32882600 | -2.79498200 | -4.25232700 | H | 1.26704400  | -7.46297600 | 4.28143000  |
| C  | 0.40452100  | -3.94007400 | -3.92251800 | H | 3.73286000  | -7.52864300 | 4.52216500  |
| C  | 0.99406100  | -4.05057800 | -2.66409600 | H | 5.16028800  | -5.68821900 | 3.67590700  |
| O  | 1.57477900  | -4.32776000 | 0.09520700  | H | 4.96871300  | 5.19467800  | -2.63617900 |
| N  | 1.40977600  | -3.41639000 | 2.32166900  | H | 4.18573300  | 6.79280500  | -2.74777300 |
| C  | 2.13216900  | -2.27179300 | 1.87870900  | H | 4.00693800  | 5.81579300  | -1.26161400 |
| C  | 3.60748900  | -2.30829100 | 1.99989300  | H | 2.04651300  | 4.52614600  | -4.89025600 |
| C  | 4.24920700  | -3.41755800 | 2.48373500  | H | 2.95712300  | 6.06361500  | -4.90714200 |
| C  | 3.48656200  | -4.49788600 | 2.98786900  | H | 3.82955400  | 4.51137500  | -4.78101100 |
|    |             |             |             | H | 1.46355500  | 5.91412800  | -1.44189100 |

H 1.54415600 6.87057400 -2.94684100  
H 0.66194600 5.32194300 -2.92830900  
H 3.25290100 2.05241100 -3.76983600  
H 3.94275900 0.13714500 -5.15590400  
H 4.12111700 -2.15328300 -4.14442800  
H 3.46253500 -2.47591300 -1.78730400

**DI**

O -1.35404000 2.31298800 1.43207400  
C -1.81366300 1.28727900 0.93860500  
C -3.09541000 1.35973600 0.11444500  
C -4.40503900 0.83299300 0.66562900  
C -4.58509900 0.68222400 2.13628600  
C -3.96088300 1.52777100 3.06881500  
C -4.21461300 1.36849800 4.43233700  
C -5.07546800 0.36058700 4.87393200  
C -5.70512500 -0.47946000 3.94780500  
C -5.47393500 -0.31132500 2.58528000  
O -5.30053700 0.52884900 -0.10578900  
C -2.93931600 1.10200900 -1.37181600  
N -1.68295700 0.82522000 -1.90699400  
C -0.69859400 1.70044400 -1.75288100  
C 0.68691900 1.31857900 -1.98038000  
C 1.05153300 -0.11738000 -2.20148400  
C 1.65866700 2.28380200 -1.92958500  
C 1.37919700 3.66875200 -1.69843100  
C 0.10356400 4.06959800 -1.45066700  
C -0.96614500 3.10856000 -1.40308700  
C -2.24697300 3.49849000 -1.09363100  
C -3.28731500 2.53970900 -0.84697100  
C -1.12964400 -0.01539000 1.00034500  
C -1.84020300 -1.19810000 0.71533800  
C -1.21562200 -2.43413100 0.68771900  
C 0.15931800 -2.50352000 0.94094400  
C 0.90024500 -1.35750700 1.21021300  
C 0.27543900 -0.09700100 1.24637500  
N 0.99122600 1.07395800 1.47053700  
C 2.34112800 1.27283300 1.29496300  
O 2.59793900 2.58130200 1.47793800  
C 3.96602700 3.09592300 1.54581500  
C 4.68749100 2.88882400 0.21265200  
C 3.75180400 4.58313500 1.81825800  
C 4.70794800 2.42775400 2.70488100  
O 3.16090300 0.42139900 1.01953500

H -3.29641400 2.32311300 2.73419000  
H -3.73601300 2.03584500 5.15242600  
H -5.26089700 0.23079700 5.94292600  
H -6.38093400 -1.26542700 4.29231100  
H -5.96196900 -0.94930200 1.84881200  
H -3.77837500 0.56246400 -1.79690600  
H 0.44238900 -0.78463800 -1.58211400  
H 0.89670100 -0.39496900 -3.25279800  
H 2.10745900 -0.28987100 -1.95395000  
H 2.69916300 1.97619400 -2.05549400  
H 2.20014000 4.38817700 -1.69554900  
H -0.13230700 5.11263900 -1.22853200  
H -2.49636600 4.56235800 -1.07166600  
H -4.32581400 2.86632300 -0.93746200  
H -2.90198500 -1.15147200 0.49233300  
H -1.78708900 -3.32732300 0.43670100  
H 0.67016500 -3.46744300 0.90726000  
H 1.97324000 -1.41313800 1.37111600  
H 0.41900100 1.90504400 1.62753800  
H 4.13574100 3.37966100 -0.60179400  
H 5.68931700 3.34168900 0.26514400  
H 4.79137800 1.82166400 -0.01659700  
H 3.21073400 4.72814800 2.76495000  
H 4.71979100 5.10193800 1.88206200  
H 3.15975700 5.03762700 1.01002400  
H 4.85566200 1.35735700 2.51376600  
H 5.69250700 2.90161800 2.83682900  
H 4.14011500 2.54868800 3.64017900  
Cu -2.09995700 -1.16372900 -3.16248800  
O -0.98203300 -0.98978700 -4.78370800  
C -0.09335000 -1.79770600 -5.15029600  
C 0.53403600 -1.44094900 -6.51201000  
F -0.41181400 -1.24221300 -7.42924900  
F 1.24702000 -0.31323700 -6.38598000  
F 1.35621300 -2.40039600 -6.96027300  
C 0.41777000 -2.89512200 -4.44385300  
C -0.01978300 -3.17571400 -3.14232000  
C 0.74525100 -4.24685700 -2.33985300  
F 1.33150900 -5.14999800 -3.13615400  
F 1.70813200 -3.64802200 -1.61895200  
F -0.06255700 -4.89234400 -1.49834900  
O -0.92864200 -2.60403500 -2.49466800  
O -3.53332800 -0.23264200 -4.16881900  
C -4.77145700 -0.36019700 -3.99772700

C -5.61263900 0.47640200 -4.98146100  
 F -6.92499700 0.22832800 -4.86961000  
 F -5.41707100 1.77879800 -4.73608500  
 F -5.24832500 0.22545200 -6.23961600  
 C -5.43439500 -1.10930600 -3.01658400  
 C -4.71506900 -1.81600100 -2.04587500  
 C -5.49759100 -2.63202800 -0.99921000  
 F -4.92075800 -2.53238100 0.20792100  
 F -6.76900700 -2.23968700 -0.88329800  
 F -5.49134900 -3.92640000 -1.34747300  
 O -3.46784900 -1.90256900 -1.92076500  
 H 1.20228600 -3.50074600 -4.88798200  
 H -6.51917600 -1.10174400 -2.97705300

**TS<sub>E1</sub>**

O -1.35479200 2.29039000 1.44493000  
 C -1.79258200 1.27295800 0.92096700  
 C -3.07175200 1.34994700 0.07440400  
 C -4.37331600 0.80088600 0.66564200  
 C -4.55024500 0.73945000 2.14018700  
 C -3.97779100 1.68082800 3.01225900  
 C -4.23426000 1.60386500 4.38213000  
 C -5.04279600 0.58338300 4.88955000  
 C -5.61715500 -0.35471100 4.02334000  
 C -5.38578300 -0.26965700 2.65328000  
 O -5.24953400 0.41294700 -0.08613300  
 C -2.92081100 0.99136000 -1.36913100  
 N -1.71755000 0.79404100 -1.95552400  
 C -0.70658600 1.65655200 -1.73803500  
 C 0.66748000 1.26372100 -1.94452500  
 C 1.01979600 -0.17259200 -2.18438500  
 C 1.65597700 2.21918100 -1.86719700  
 C 1.37987900 3.59517300 -1.64206500  
 C 0.09186300 4.00134900 -1.43132800  
 C -0.97571800 3.05030800 -1.39983900  
 C -2.28182100 3.46809200 -1.14036300  
 C -3.30705200 2.58367800 -0.76605000  
 C -1.10791300 -0.02886700 0.97570500  
 C -1.80899600 -1.21011600 0.66021900  
 C -1.17933900 -2.44318800 0.62142800  
 C 0.19154600 -2.51162400 0.89794200  
 C 0.92224800 -1.36820200 1.20239400  
 C 0.29268300 -0.10975900 1.24743800  
 N 0.99965800 1.05847800 1.50396700

C 2.35305400 1.26276300 1.35573500  
 O 2.60247700 2.56882600 1.55797100  
 C 3.96782400 3.09090400 1.62831700  
 C 4.69067900 2.89182000 0.29466800  
 C 3.74484800 4.57604300 1.90486500  
 C 4.71237200 2.42325100 2.78593400  
 O 3.17935300 0.41544000 1.08814300  
 H -3.34747900 2.48002800 2.62416700  
 H -3.79764100 2.34420700 5.05598200  
 H -5.22930000 0.51901900 5.96427500  
 H -6.24969500 -1.15170500 4.42048900  
 H -5.83007000 -0.98505400 1.96085800  
 H -3.79367200 0.50864000 -1.79687600  
 H 0.38996200 -0.84500400 -1.59248500  
 H 0.88494600 -0.42789700 -3.24467800  
 H 2.06818400 -0.36438500 -1.91921900  
 H 2.69490200 1.89965900 -1.97514000  
 H 2.20046400 4.31454300 -1.61526300  
 H -0.14194100 5.04677200 -1.21818300  
 H -2.53786900 4.52063000 -1.29057300  
 H -4.34881300 2.90155000 -0.84764700  
 H -2.86774500 -1.16745800 0.42155400  
 H -1.74315800 -3.33358500 0.34469700  
 H 0.70701100 -3.47288600 0.85524900  
 H 1.99196000 -1.42281200 1.38382400  
 H 0.42367700 1.88749600 1.65675500  
 H 4.13113400 3.37376800 -0.51971700  
 H 5.68635200 3.35818700 0.34597000  
 H 4.80878900 1.82603600 0.06600800  
 H 3.20004300 4.71504900 2.85033400  
 H 4.70992500 5.09960200 1.97355200  
 H 3.15309600 5.03008700 1.09618400  
 H 4.86394400 1.35383600 2.59240300  
 H 5.69522400 2.90050200 2.91859400  
 H 4.14434500 2.54013000 3.72163500  
 Cu -2.13636900 -1.19573900 -3.23771200  
 O -1.01880800 -0.97614900 -4.84964900  
 C -0.10969600 -1.75786900 -5.22279800  
 C 0.52102400 -1.36342300 -6.57266900  
 F -0.42176500 -1.16551100 -7.49325300  
 F 1.21174500 -0.22564800 -6.42023000  
 F 1.36411700 -2.29925800 -7.03223400  
 C 0.41907700 -2.85758000 -4.53241300  
 C -0.02218900 -3.17085100 -3.23995500

C 0.76294400 -4.23398200 -2.44663700  
 F 1.36880900 -5.11712600 -3.25046500  
 F 1.71236800 -3.62202200 -1.71838700  
 F -0.03230900 -4.90321900 -1.61199400  
 O -0.94980000 -2.63150000 -2.59092800  
 O -3.59724400 -0.27773000 -4.21415200  
 C -4.83001400 -0.41139600 -4.01386800  
 C -5.69901900 0.41849400 -4.97944100  
 F -7.00709800 0.16337300 -4.83551000  
 F -5.50526000 1.72246000 -4.74259600  
 F -5.36349400 0.16538800 -6.24504500  
 C -5.46670300 -1.16438800 -3.01753500  
 C -4.72257500 -1.87027300 -2.06549500  
 C -5.47641400 -2.68817800 -0.99903800  
 F -4.88444900 -2.56631800 0.19931600  
 F -6.75217700 -2.31601400 -0.86933600  
 F -5.45268500 -3.98582000 -1.33351500  
 O -3.47208100 -1.95216100 -1.97101300  
 H 1.22102300 -3.43700000 -4.98043700  
 H -6.55034300 -1.16250200 -2.95387800

**E1**

O 0.69121600 -2.60421700 -2.82774700  
 C 0.43533900 -1.91970000 -1.86625600  
 C 1.62592400 -1.46572100 -0.94543200  
 C 1.54615600 -2.41812400 0.27376000  
 C 2.47559200 -2.28976100 1.43642100  
 C 3.68205400 -1.56931400 1.41999800  
 C 4.53756100 -1.60880900 2.52177600  
 C 4.18328600 -2.33482400 3.66022600  
 C 2.96768100 -3.02760700 3.69812400  
 C 2.12480000 -3.01431900 2.59127900  
 O 0.71277600 -3.29982400 0.24737400  
 C 1.58102800 -0.01620500 -0.56039600  
 N 1.36051300 0.92963300 -1.40666300  
 C 1.24316700 0.69527100 -2.80278800  
 C 0.14460800 1.20147700 -3.53256700  
 C -1.14464800 1.59820900 -2.86976700  
 C 0.22164500 1.19165600 -4.92891700  
 C 1.33549000 0.67827100 -5.59720100  
 C 2.35457000 0.07172400 -4.87216800  
 C 2.30112200 0.01593400 -3.46808200  
 C 3.24055800 -0.86370000 -2.77840000  
 C 2.95685700 -1.58526300 -1.67560500

C -0.99425700 -1.56109200 -1.54862500  
 C -1.91842300 -2.01989900 -2.50886500  
 C -3.28197000 -1.78168600 -2.39207800  
 C -3.76505200 -1.06964600 -1.29016700  
 C -2.87093400 -0.60863800 -0.32877600  
 C -1.49320100 -0.84222700 -0.44074700  
 N -0.65728200 -0.26539800 0.56929500  
 C -0.77994600 -0.68095500 1.89342000  
 O -0.30696600 0.29967800 2.68232800  
 C -0.58857400 0.32600900 4.12225900  
 C 0.17653700 -0.79719500 4.81948100  
 C -0.07781600 1.70034600 4.55097200  
 C -2.09984800 0.23249400 4.34615100  
 O -1.21713000 -1.74947900 2.24683600  
 H 3.96955500 -0.97407400 0.55396800  
 H 5.47300800 -1.04769500 2.49749500  
 H 4.85137100 -2.35397700 4.52467300  
 H 2.67970100 -3.58163300 4.59429500  
 H 1.17640100 -3.55256400 2.59044200  
 H 1.85087200 0.26262800 0.45729100  
 H -1.87036500 0.77693800 -2.98197800  
 H -1.02443600 1.77916200 -1.79981500  
 H -1.57616300 2.48996600 -3.34028700  
 H -0.61963200 1.59039700 -5.50092300  
 H 1.38061700 0.70651500 -6.68798900  
 H 3.18213300 -0.42101000 -5.38739000  
 H 4.19247000 -1.05189000 -3.28387600  
 H 3.68834500 -2.29948800 -1.29481600  
 H -1.51758600 -2.57411000 -3.35745800  
 H -3.96836200 -2.15108800 -3.15708900  
 H -4.83350600 -0.87028300 -1.18115600  
 H -3.22900600 -0.03767800 0.52898600  
 H -0.59560000 0.75701800 0.51675300  
 H 1.24607600 -0.73588100 4.57505500  
 H 0.06096600 -0.70177500 5.91034000  
 H -0.20091300 -1.77843200 4.50591200  
 H -0.55143000 2.48723200 3.94780200  
 H -0.31513600 1.87356400 5.61110600  
 H 1.00957100 1.76928400 4.42750700  
 H -2.49040400 -0.74397900 4.03387100  
 H -2.32111100 0.37346000 5.41480000  
 H -2.61424900 1.02403100 3.78026300  
 Cu 1.49164500 2.82448400 -0.62705900  
 O -0.45468200 2.67760200 0.40870200

C -1.30394000 3.57168200 0.19392300  
 C -2.41934100 3.63168800 1.25756200  
 F -2.95428800 2.40797400 1.42970900  
 F -1.90414300 4.01673800 2.43525700  
 F -3.41119000 4.47203800 0.94726700  
 C -1.34433300 4.48942100 -0.87052700  
 C -0.41733400 4.50043700 -1.92410800  
 C -0.67512000 5.46444100 -3.10152000  
 F -1.66502600 6.33279600 -2.85543000  
 F 0.42593400 6.15875200 -3.38711600  
 F -1.01652700 4.75691600 -4.19381100  
 O 0.60372700 3.78803300 -2.10169500  
 O 2.68116300 2.18773500 0.83077200  
 C 2.80969000 2.76186600 1.94706100  
 C 3.53498500 1.89523000 2.99091100  
 F 4.75509500 1.56614200 2.54867400  
 F 3.67349900 2.51057900 4.17148500  
 F 2.84480800 0.76552900 3.19724700  
 C 2.38776900 4.03876900 2.31706300  
 C 1.82492200 4.90067200 1.36296500  
 C 1.31350800 6.28302800 1.81137100  
 F -0.02598200 6.29258200 1.72807600  
 F 1.65103800 6.56823000 3.07548200  
 F 1.79017100 7.24505400 1.02229300  
 O 1.65051500 4.66977400 0.14567700  
 H -2.15814200 5.20761900 -0.90173500  
 H 2.52621900 4.37895100 3.33857100

**TS<sub>3a</sub>**

O 0.93407400 -2.84016500 -2.85775700  
 C 0.57107900 -2.24845200 -1.87003600  
 C 1.59294000 -1.61559500 -0.88727700  
 C 1.80936900 -2.70357200 0.20995800  
 C 2.98150900 -2.64689500 1.13415000  
 C 3.82094200 -1.53174300 1.29916700  
 C 4.89051000 -1.58396800 2.19354500  
 C 5.13669300 -2.74482200 2.92960500  
 C 4.30098000 -3.85724200 2.78021900  
 C 3.22969600 -3.80561700 1.89380900  
 O 1.00459900 -3.61194200 0.28102000  
 C 1.01271300 -0.36868300 -0.22134000  
 N 0.76630600 0.81937800 -1.01573600  
 C 0.66282900 0.75129100 -2.42735500  
 C -0.49673100 1.28434500 -3.04211000

C -1.68260400 1.72441100 -2.22420100  
 C -0.53883800 1.37895200 -4.43584900  
 C 0.53378700 0.96217700 -5.22656000  
 C 1.66158000 0.41684800 -4.62259600  
 C 1.73644900 0.28325100 -3.22708100  
 C 2.90103200 -0.39503600 -2.65183800  
 C 2.87132800 -1.24383300 -1.61201500  
 C -0.86971000 -2.15964900 -1.49877900  
 C -1.78653300 -2.90342600 -2.25806100  
 C -3.14210800 -2.89769700 -1.95189600  
 C -3.60249300 -2.13152900 -0.87516900  
 C -2.71330300 -1.36943500 -0.11883000  
 C -1.34927700 -1.39146600 -0.42818800  
 N -0.44591700 -0.51239900 0.29888000  
 C -0.55014900 -0.49351400 1.76789900  
 O -1.55594900 0.27489600 2.10347200  
 C -1.79648300 0.70226000 3.51700900  
 C -0.59849500 1.53936000 3.95459900  
 C -3.05697700 1.54597600 3.38794000  
 C -2.02385500 -0.52767600 4.38961600  
 O 0.24603500 -1.07091000 2.44997600  
 H 3.64402000 -0.60622600 0.75356000  
 H 5.52274200 -0.70524400 2.32634600  
 H 5.97808100 -2.78113700 3.62584300  
 H 4.48698400 -4.76513300 3.35853100  
 H 2.56080800 -4.65740000 1.76514400  
 H 1.59116200 -0.11336700 0.66860800  
 H -2.29400900 0.85615000 -1.92157200  
 H -1.38435500 2.25211300 -1.30998700  
 H -2.32807400 2.39607000 -2.80593100  
 H -1.42695600 1.80461600 -4.90816300  
 H 0.48523400 1.06090200 -6.31307200  
 H 2.49893800 0.06730900 -5.23107300  
 H 3.84878100 -0.27244700 -3.18574400  
 H 3.78293400 -1.76778300 -1.32653500  
 H -1.38635800 -3.48746600 -3.08792700  
 H -3.84278200 -3.48532400 -2.54834600  
 H -4.66601600 -2.11285700 -0.62744000  
 H -3.07275600 -0.74270800 0.69490200  
 H -0.45813100 0.55945000 -0.23884500  
 H -0.40930400 2.33841900 3.22318100  
 H -0.81673800 2.00162600 4.92863500  
 H 0.29693500 0.91670200 4.06401500  
 H -3.90109700 0.93526700 3.03311700



H -3.32206600 1.96486100 4.36955200  
 H -2.89580300 2.37447900 2.68730700  
 H -1.11801200 -1.14117200 4.46833300  
 H -2.31273900 -0.19713300 5.39861900  
 H -2.84189500 -1.14458200 3.98699200  
 Cu 1.50552500 2.54722800 -0.31556000  
 O -0.27280500 3.28926000 0.87019500  
 C -0.73330200 4.40315600 0.54731300  
 C -1.54196600 5.10927300 1.65900100  
 F -2.75602900 4.53116500 1.78338800  
 F -0.91661600 4.98747200 2.83708100  
 F -1.74216000 6.41083800 1.42865200  
 C -0.63713000 5.06826300 -0.69192400  
 C 0.08108800 4.57853900 -1.78906200  
 C -0.08366600 5.30950500 -3.13711300  
 F -0.63878100 6.52358100 -3.00769800  
 F 1.08900600 5.45442900 -3.75221100  
 F -0.88717100 4.58248000 -3.93772200  
 O 0.83182700 3.57398200 -1.87242500  
 O 2.38418800 1.71056200 1.28561700  
 C 2.68734300 2.35692300 2.32676700  
 C 3.13397300 1.49236100 3.52235700  
 F 4.46766800 1.31990200 3.47549500  
 F 2.84060200 2.07239200 4.69490200  
 F 2.56078900 0.28952700 3.50290700  
 C 2.73262900 3.73988700 2.50344100  
 C 2.56976300 4.61143700 1.41300400  
 C 2.61759200 6.13068200 1.66781600  
 F 1.37920100 6.63283500 1.52699400  
 F 3.04369400 6.43273500 2.90210900  
 F 3.41586700 6.73680000 0.79017200  
 O 2.35274800 4.30123600 0.22268700  
 H -1.15299100 6.01701800 -0.80716200  
 H 2.95501900 4.14576600 3.48604100

**3a**

O 0.13981600 -2.83531400 -2.84313800  
 C 0.00312900 -2.24977300 -1.79611900  
 C 1.18962000 -1.82889100 -0.90554500  
 C 1.16028700 -2.79510200 0.32098800  
 C 1.94934000 -2.46215200 1.54887200  
 C 3.04787600 -1.58677700 1.56284200  
 C 3.70749800 -1.30089600 2.75892600  
 C 3.27886700 -1.88800700 3.95155300

C 2.19458300 -2.77376800 3.94496500  
 C 1.53722400 -3.06317500 2.75176100  
 O 0.45981900 -3.78394300 0.27544700  
 C 0.86616900 -0.41841200 -0.38176600  
 N 0.56075000 0.62527700 -1.38291200  
 C 1.19474700 0.78604300 -2.64974600  
 C 0.52455800 1.63545000 -3.56378200  
 C -0.91559500 2.02605300 -3.35274700  
 C 1.20147400 2.06801000 -4.70442900  
 C 2.50559300 1.64711400 -4.97106400  
 C 3.10116500 0.71620000 -4.13206200  
 C 2.45118000 0.22599400 -2.97975200  
 C 3.07587700 -0.93822100 -2.34922000  
 C 2.54400800 -1.87785400 -1.54987200  
 C -1.33161700 -1.84679400 -1.25378000  
 C -2.47790400 -2.29219200 -1.92804400  
 C -3.74862200 -1.94076400 -1.48795100  
 C -3.87555900 -1.11060000 -0.36797100  
 C -2.75308200 -0.64418400 0.31327200  
 C -1.47016700 -1.02103700 -0.10880200  
 N -0.29138600 -0.50402500 0.49041100  
 C -0.16472600 0.14972800 1.71528600  
 O -1.09011100 -0.19569700 2.58402300  
 C -1.20936700 0.48198900 3.89994600  
 C -1.58014700 1.94256400 3.66532800  
 C -2.35257600 -0.28732400 4.55354200  
 C 0.08440900 0.31996400 4.69572300  
 O 0.76017800 0.91945700 1.91205800  
 H 3.40962200 -1.13738400 0.64021000  
 H 4.55769500 -0.61616800 2.75398700  
 H 3.79050800 -1.65697100 4.88882500  
 H 1.86132200 -3.23726900 4.87639600  
 H 0.68838000 -3.74800600 2.72397900  
 H 1.70958700 -0.07315200 0.20988900  
 H -1.58190200 1.16669100 -3.54762400  
 H -1.12424900 2.37515800 -2.33621000  
 H -1.20200200 2.83517800 -4.03609300  
 H 0.69556700 2.75545700 -5.38545700  
 H 3.03554900 2.01501300 -5.85172500  
 H 4.08699400 0.31442300 -4.37598300  
 H 4.09648400 -1.12335600 -2.69572500  
 H 3.16115500 -2.74763600 -1.31314000  
 H -2.32660100 -2.92331100 -2.80544700  
 H -4.63527300 -2.29729600 -2.01574400

|           |             |             |             |    |             |             |             |
|-----------|-------------|-------------|-------------|----|-------------|-------------|-------------|
| H         | -4.86536800 | -0.80028000 | -0.02530100 | C  | 2.10828100  | 1.65881000  | -1.92701600 |
| H         | -2.86869600 | 0.03289000  | 1.15266400  | C  | 2.11378000  | 0.34664700  | -1.30596000 |
| H         | -0.45060400 | 0.68842700  | -1.49178500 | Cu | 0.24251200  | -0.13211200 | -0.61740400 |
| H         | -2.53598400 | 2.01937400  | 3.13056100  | O  | -1.57139900 | -0.52783500 | 0.07829100  |
| H         | -1.68863800 | 2.44944100  | 4.63582800  | C  | -2.43110500 | -1.21473400 | -0.51361300 |
| H         | -0.80790700 | 2.46951600  | 3.09318300  | C  | -3.83404900 | -1.21019400 | 0.12980100  |
| H         | -2.08541800 | -1.34709300 | 4.67869700  | F  | -3.79100600 | -0.86389600 | 1.41237100  |
| H         | -2.57187900 | 0.13979200  | 5.54287900  | F  | -4.61448200 | -0.33105700 | -0.51675200 |
| H         | -3.26256200 | -0.22798700 | 3.93857400  | F  | -4.42005500 | -2.41742100 | 0.03818800  |
| H         | 0.89075400  | 0.93681800  | 4.28530900  | C  | -2.28553200 | -1.93206000 | -1.71393700 |
| H         | -0.09960600 | 0.62572500  | 5.73685500  | C  | -1.08102200 | -1.94685600 | -2.41666600 |
| H         | 0.40661700  | -0.73114600 | 4.69424900  | C  | -1.04777300 | -2.73690000 | -3.74061000 |
| Cu        | 0.91136500  | 2.39672800  | -0.13928300 | F  | -1.78787000 | -3.85491700 | -3.66933100 |
| O         | -1.03891400 | 2.57725600  | 0.10173400  | F  | -1.53861000 | -1.98351100 | -4.73328600 |
| C         | -1.69103100 | 3.63474200  | -0.15215300 | F  | 0.19868000  | -3.09051600 | -4.07079400 |
| C         | -3.05306500 | 3.70346200  | 0.56380400  | O  | -0.00389200 | -1.35626500 | -2.13532400 |
| F         | -3.60346000 | 2.48473300  | 0.66807300  | O  | 0.62879600  | 0.83668200  | 1.04877500  |
| F         | -2.89076000 | 4.18515200  | 1.80649600  | C  | 0.09614800  | 1.91414400  | 1.43833500  |
| F         | -3.92848500 | 4.49472400  | -0.06808600 | C  | 0.42094500  | 2.20552800  | 2.91520200  |
| C         | -1.34128400 | 4.70528900  | -0.96715700 | F  | -0.03471000 | 3.39410600  | 3.33159000  |
| C         | -0.10950800 | 4.77447700  | -1.67153200 | F  | -0.11611500 | 1.26097900  | 3.70200100  |
| C         | 0.04796600  | 5.90313900  | -2.71576000 | F  | 1.74997900  | 2.18707800  | 3.11102800  |
| F         | -0.83941200 | 6.89547000  | -2.55151100 | C  | -0.69008400 | 2.82279600  | 0.73974600  |
| F         | 1.27076100  | 6.42711000  | -2.67578800 | C  | -1.03609700 | 2.66949100  | -0.62701000 |
| F         | -0.14576500 | 5.38497200  | -3.94514600 | C  | -1.96508900 | 3.76577700  | -1.20544300 |
| O         | 0.84832400  | 3.99088700  | -1.61142600 | F  | -1.96690400 | 3.74452400  | -2.53921200 |
| O         | 2.81145900  | 1.93643600  | -0.19747800 | F  | -3.22380600 | 3.57734400  | -0.78287100 |
| C         | 3.62925600  | 2.21123000  | 0.72120900  | F  | -1.58611600 | 4.99841400  | -0.81330500 |
| C         | 5.04208600  | 1.64486900  | 0.47774600  | O  | -0.71030800 | 1.76409500  | -1.40653100 |
| F         | 4.98494800  | 0.44033500  | -0.10653800 | C  | 3.30851200  | -0.47491600 | -1.22725600 |
| F         | 5.73190600  | 2.46015000  | -0.32510500 | C  | 3.74420800  | -1.46530100 | -2.20343000 |
| F         | 5.73504900  | 1.50575600  | 1.62145600  | C  | 4.91068600  | -2.20442300 | -1.94016100 |
| C         | 3.42545400  | 2.97591400  | 1.87049700  | C  | 5.32097800  | -3.17920700 | -2.84355600 |
| C         | 2.20920700  | 3.64133100  | 2.11667900  | C  | 4.56952600  | -3.41566700 | -4.00449700 |
| C         | 2.05555500  | 4.39691000  | 3.45309100  | C  | 3.40808300  | -2.68144300 | -4.26306500 |
| F         | 1.26271800  | 3.68335300  | 4.27366500  | C  | 2.98943100  | -1.70151600 | -3.36380200 |
| F         | 3.22620000  | 4.58013500  | 4.07964800  | O  | 3.84124700  | -0.19359500 | -0.15166800 |
| F         | 1.49160700  | 5.58851600  | 3.26541100  | N  | 1.84638300  | -3.11630900 | 0.03765400  |
| O         | 1.19325100  | 3.68165700  | 1.39250300  | C  | 1.82040300  | -3.90671600 | -1.01269000 |
| H         | -2.06075700 | 5.50818500  | -1.10124800 | C  | 0.69325600  | -4.67658800 | -1.39392600 |
| H         | 4.23513500  | 3.07499100  | 2.58740900  | C  | -0.44851200 | -4.59060000 | -0.63096200 |
| <b>F1</b> |             |             |             | C  | -0.46117000 | -3.75986300 | 0.51901700  |
| O         | 1.82913600  | 1.37900500  | -3.10565900 | C  | 0.73694200  | -3.03247600 | 0.82728500  |
|           |             |             |             | C  | 0.78312900  | -2.20494100 | 1.99797100  |

C 2.06515200 -1.53247300 2.39365900  
 C -0.36550300 -2.08713600 2.76233200  
 C -1.55248800 -2.78750200 2.44575500  
 C -1.60262600 -3.62152300 1.35044300  
 C 2.20856900 2.94097300 -1.27896500  
 C 2.72031600 2.97086900 0.03667500  
 C 2.76032400 4.15394500 0.75347600  
 C 2.26527700 5.31987900 0.15111500  
 C 1.74354400 5.31979100 -1.13767300  
 C 1.70526400 4.13097700 -1.89411000  
 N 1.20296900 4.04262600 -3.17943100  
 C 0.45035700 4.91484800 -3.96296200  
 O 0.12751800 6.03534800 -3.31894200  
 C -0.70031400 7.08098800 -3.94197300  
 C -2.06217300 6.51168100 -4.33832300  
 C -0.84825100 8.09818000 -2.81294700  
 C 0.04960400 7.67462400 -5.13356800  
 O 0.15186200 4.62027200 -5.09658200  
 H -3.12486300 -2.51315200 -2.08821700  
 H -1.03994500 3.70742800 1.26524200  
 H 5.46396500 -2.00831800 -1.02009500  
 H 6.22237300 -3.76365600 -2.64742800  
 H 4.89202800 -4.18611400 -4.70917700  
 H 2.81661900 -2.88158200 -5.15808100  
 H 2.07017600 -1.14360400 -3.53688000  
 H 2.72924100 -3.95095800 -1.62065300  
 H 0.73773300 -5.30115300 -2.28733800  
 H -1.35096400 -5.14531000 -0.89961900  
 H 2.49092100 -0.94437300 1.57337600  
 H 1.90834300 -0.86680500 3.25227300  
 H 2.82267000 -2.28814300 2.65962300  
 H -0.35089400 -1.43098700 3.63470500  
 H -2.43448700 -2.65659000 3.07540800  
 H -2.51375400 -4.16905500 1.09953100  
 H 3.06745000 2.03855400 0.48391700  
 H 3.14591200 4.16904500 1.77300200  
 H 2.27865600 6.26096900 0.70663700  
 H 1.35569700 6.23450400 -1.57102800  
 H 1.31010800 3.13647900 -3.63547700  
 H -2.55207400 6.04962900 -3.47063900  
 H -2.70063300 7.32969600 -4.70516700  
 H -1.96201500 5.75796700 -5.12832000  
 H 0.13288000 8.50146800 -2.51884800  
 H -1.48304500 8.93518700 -3.13878000

H -1.31082400 7.62332900 -1.93550800  
 H 0.17086400 6.93061600 -5.93088200  
 H -0.51349600 8.53217600 -5.53227000  
 H 1.04351800 8.03140300 -4.82220100

**TS<sub>G1</sub>**

O 3.16047700 -0.30701400 -2.67007800  
 C 2.02505000 -0.64379500 -2.33494200  
 C 0.99224600 0.28118600 -2.80978600  
 C 1.14447800 1.78057300 -2.83947200  
 C 1.61443300 2.51842300 -1.62041800  
 C 2.48430000 2.00057700 -0.64779000  
 C 2.86122100 2.78843500 0.44163200  
 C 2.36191500 4.08430000 0.58476900  
 C 1.48810000 4.60398300 -0.37620500  
 C 1.13100000 3.83299200 -1.47896600  
 O 0.78880600 2.40223100 -3.82671600  
 Cu -0.90443300 0.24315900 -1.67735000  
 O -2.33553500 -1.05572700 -0.99351600  
 C -3.19889900 -1.56489400 -1.73913900  
 C -4.02084800 -2.70345100 -1.09826000  
 F -4.22356800 -2.48876000 0.19611600  
 F -5.20772400 -2.87298300 -1.69391200  
 F -3.33705200 -3.86305600 -1.22932800  
 C -3.45473200 -1.26783800 -3.08852600  
 C -2.74910300 -0.27459900 -3.76926300  
 C -3.19309400 0.03072900 -5.21545400  
 F -4.24829700 0.85646000 -5.19523200  
 F -2.22502000 0.60833700 -5.92123700  
 F -3.56658400 -1.09115700 -5.85480900  
 O -1.83157500 0.47400300 -3.33902300  
 O 0.09433400 0.02276400 -0.05239100  
 C 0.04961300 0.77954000 0.96370100  
 C 0.83903000 0.19326700 2.15006100  
 F 0.79896100 0.97062600 3.23571500  
 F 0.35780500 -1.00837000 2.47627800  
 F 2.13941500 0.03197500 1.82100000  
 C -0.58495500 2.00104600 1.13115200  
 C -1.35230100 2.59847800 0.10184000  
 C -1.97427900 3.98546300 0.38465600  
 F -1.84717200 4.78419400 -0.67809300  
 F -3.27890700 3.84940600 0.65325700  
 F -1.39942400 4.59881000 1.43190800  
 O -1.62073000 2.12292400 -1.01279600

C 1.68662700 -1.83076100 -1.52998000  
 C 0.45550400 -2.47504700 -1.73214400  
 C 0.00541300 -3.45368600 -0.85322400  
 C 0.78091000 -3.78399900 0.26123600  
 C 2.01294400 -3.16460200 0.46766500  
 C 2.49273700 -2.20218500 -0.42668800  
 N 3.70325400 -1.53770200 -0.13800700  
 C 4.89435100 -1.64120300 -0.83551800  
 O 4.77522000 -2.51895200 -1.83498600  
 C 5.83868700 -2.71137600 -2.82118400  
 C 7.08017400 -3.28731600 -2.13860400  
 C 5.21672900 -3.72568300 -3.77636400  
 C 6.13309000 -1.39395300 -3.53999200  
 O 5.88775800 -1.02743400 -0.51607200  
 H 2.89180400 0.99752500 -0.73030200  
 H 3.54580700 2.37725800 1.18565700  
 H 2.64793100 4.68881300 1.44865800  
 H 1.07724700 5.60904200 -0.26215900  
 H 0.44638200 4.22034500 -2.23346400  
 H -4.23394700 -1.81299200 -3.61433900  
 H -0.45902000 2.53030900 2.07025000  
 H -0.15563600 -2.18218100 -2.58644900  
 H -0.95911600 -3.93377100 -1.01603200  
 H 0.42516000 -4.53110100 0.97419500  
 H 2.62411400 -3.41947900 1.33550500  
 H 3.79746400 -1.11605400 0.77906100  
 H 6.82073900 -4.20432400 -1.58719500  
 H 7.83303400 -3.54556600 -2.89933700  
 H 7.51380600 -2.56257600 -1.43884300  
 H 4.27932400 -3.32907200 -4.18730200  
 H 5.90661100 -3.94583900 -4.60492000  
 H 4.98758000 -4.66419700 -3.24982400  
 H 6.55419900 -0.65510200 -2.84667600  
 H 6.85802500 -1.57326600 -4.34895800  
 H 5.20993200 -0.98086200 -3.96904800  
 N -0.08375800 -1.44947800 -4.75453600  
 C 0.54886300 -0.24665100 -4.78037600  
 C 1.84927800 -0.09172400 -5.38893600  
 C 2.51274700 -1.19860000 -5.83326300  
 C 1.89528100 -2.48342000 -5.73743500  
 C 0.56024100 -2.54542300 -5.18971900  
 C -0.12036700 -3.81478500 -5.12371300  
 C -1.53053500 -3.87780300 -4.61544300  
 C 0.54953500 -4.94381600 -5.55946000

C 1.86306900 -4.87879300 -6.08176400  
 C 2.52221000 -3.66637700 -6.18021000  
 H -0.10564500 0.62701200 -4.76055400  
 H 2.27594800 0.90859600 -5.45924700  
 H 3.50557200 -1.11881100 -6.28269200  
 H -2.17710800 -3.18391700 -5.17162600  
 H -1.93544200 -4.89549300 -4.70272700  
 H -1.59795100 -3.57187000 -3.56077700  
 H 0.04542300 -5.91211400 -5.50987500  
 H 2.35151400 -5.79559100 -6.41940800  
 H 3.52977900 -3.61123400 -6.59776100

**G1**

O 3.58477900 -0.59411800 -2.67421700  
 C 2.85873700 -0.37241000 -1.71306100  
 C 1.80778300 0.66964700 -1.88271200  
 C 1.56749100 1.77697600 -0.94793100  
 C 2.60126900 2.11700400 0.07487200  
 C 3.97418700 1.97855100 -0.18445800  
 C 4.91000500 2.33826000 0.78614100  
 C 4.48217900 2.82622800 2.02401900  
 C 3.11497900 2.97564000 2.28249000  
 C 2.17828800 2.63662300 1.30797300  
 O 0.51379100 2.41022900 -1.01918300  
 Cu -1.39439000 -0.90155600 -2.85930700  
 O -3.22020600 -1.45505700 -2.27835300  
 C -4.22260500 -1.35815200 -3.02797500  
 C -5.56018700 -1.36445600 -2.26322800  
 F -5.58367300 -0.34830600 -1.39280300  
 F -6.61718200 -1.24118200 -3.07546800  
 F -5.69370200 -2.50519500 -1.57784900  
 C -4.23990800 -1.25059500 -4.42638600  
 C -3.05198700 -1.28569500 -5.16265700  
 C -3.12277900 -1.32731000 -6.70015800  
 F -2.42101700 -0.31813200 -7.22240100  
 F -2.59416700 -2.47658600 -7.14293300  
 F -4.37763200 -1.24497800 -7.15945300  
 O -1.87019900 -1.31631900 -4.72896200  
 O -1.00714200 -0.40584900 -0.97349100  
 C -1.75215400 0.37452400 -0.30705000  
 C -1.56299800 0.22717400 1.21436700  
 F -2.52393600 0.82445700 1.92534100  
 F -1.52934300 -1.06580500 1.56507600  
 F -0.38536800 0.77005200 1.58627500

C -2.66071900 1.32337500 -0.75890500  
 C -2.82175100 1.63112900 -2.13034500  
 C -3.94681900 2.61266100 -2.52294900  
 F -3.48916300 3.55621000 -3.34874100  
 F -4.91016200 1.92829900 -3.16806600  
 F -4.51329100 3.21907900 -1.47060500  
 O -2.18925200 1.16439500 -3.09369800  
 C 2.98115400 -1.03084400 -0.38842400  
 C 1.81807600 -1.20317600 0.37857200  
 C 1.88300600 -1.68096200 1.68569800  
 C 3.12820900 -1.96653100 2.25017300  
 C 4.29136000 -1.82455800 1.49118000  
 C 4.23511300 -1.38761400 0.16338800  
 N 5.43271500 -1.23833800 -0.56740700  
 C 5.82271900 -2.01410800 -1.64725900  
 O 4.91105600 -2.95869100 -1.89543800  
 C 4.99350400 -3.82339700 -3.07097300  
 C 6.21430300 -4.73656800 -2.94874700  
 C 3.69660300 -4.62393400 -2.98041100  
 C 5.02645900 -2.98502700 -4.34931400  
 O 6.87679700 -1.84967200 -2.21971300  
 H 4.32276000 1.60523400 -1.14874700  
 H 5.97718200 2.24165600 0.57222800  
 H 5.21551200 3.09778100 2.78717900  
 H 2.77992800 3.36042800 3.24837100  
 H 1.10935200 2.74834600 1.48920500  
 H -5.19042000 -1.18548800 -4.94653900  
 H -3.26313900 1.85584900 -0.02943600  
 H 0.85124400 -0.95585400 -0.06086700  
 H 0.96418100 -1.80750500 2.25983200  
 H 3.19703200 -2.31773900 3.28251200  
 H 5.26549500 -2.07185100 1.91876700  
 H 6.19705800 -0.73003400 -0.13737900  
 H 6.17934200 -5.29592900 -2.00105300  
 H 6.21954200 -5.46225700 -3.77675100  
 H 7.14161800 -4.15125400 -2.98224600  
 H 2.83441800 -3.94489000 -3.01292100  
 H 3.62099500 -5.32695400 -3.82323800  
 H 3.65892400 -5.19224400 -2.03925100  
 H 5.95306400 -2.40094300 -4.41057000  
 H 4.96588500 -3.65104900 -5.22360900  
 H 4.17517400 -2.29343300 -4.37351900  
 N 0.52548900 -0.69917100 -3.42044800  
 C 0.98867200 0.65021100 -3.16624300

C 1.75991300 1.29318500 -4.27530000  
 C 2.13292100 0.59217200 -5.36469000  
 C 1.83625100 -0.81309900 -5.46476300  
 C 1.02571200 -1.42064800 -4.42954500  
 C 0.74483400 -2.83604800 -4.48997300  
 C -0.00100700 -3.51557700 -3.37723700  
 C 1.23267700 -3.55764800 -5.56560000  
 C 1.98646200 -2.95006800 -6.59073100  
 C 2.29106500 -1.59488200 -6.53212400  
 H 0.11125700 1.28201000 -2.93575400  
 H 2.00440600 2.35051000 -4.15498900  
 H 2.68348500 1.06830500 -6.17926400  
 H -1.08487800 -3.32246500 -3.43894800  
 H 0.13549000 -4.60440700 -3.42709900  
 H 0.34369300 -3.16644200 -2.39209900  
 H 1.04250800 -4.63235300 -5.61001900  
 H 2.34772200 -3.55576000 -7.42439100  
 H 2.89239400 -1.12691800 -7.31440700

**TS<sub>DIA</sub>**

O 3.45438700 -0.35851100 -2.77985200  
 C 2.32445100 -0.46079300 -2.34396800  
 C 1.25861100 0.51607200 -2.80881300  
 C 1.04676000 1.81706400 -2.13557900  
 C 1.90873600 2.29492500 -1.01023100  
 C 2.28994200 1.49668500 0.07692800  
 C 3.00399700 2.04747900 1.14206300  
 C 3.36309900 3.39665700 1.12385600  
 C 2.97900600 4.20291100 0.04630000  
 C 2.24251800 3.66077800 -1.00450800  
 O 0.17644700 2.57588100 -2.56909400  
 Cu -2.40593000 0.16507100 -1.26309100  
 O -2.85225200 -1.71736000 -1.00501000  
 C -3.24962500 -2.50835600 -1.90550900  
 C -3.48519100 -3.94390300 -1.39916200  
 F -4.29266300 -3.94159600 -0.33900300  
 F -4.02360300 -4.73155900 -2.33798600  
 F -2.31189000 -4.48548700 -1.03313700  
 C -3.43381600 -2.24149400 -3.26140500  
 C -3.14529000 -0.97677400 -3.79255100  
 C -3.27665000 -0.77349900 -5.31561000  
 F -4.46074200 -0.21434600 -5.59262600  
 F -2.31595700 0.02381500 -5.77724800  
 F -3.20747400 -1.94058100 -5.97628200

|   |             |             |             |   |             |             |             |
|---|-------------|-------------|-------------|---|-------------|-------------|-------------|
| O | -2.83098100 | 0.06280100  | -3.16158400 | H | 4.67671200  | -4.90167500 | -4.70657300 |
| O | -1.55115400 | 0.22515200  | 0.47059500  | H | 4.05152300  | -5.20501200 | -3.05877100 |
| C | -1.04286200 | 1.26113500  | 0.99029000  | H | 6.39246500  | -1.64999300 | -3.80232900 |
| C | -0.37418400 | 0.98156800  | 2.34938300  | H | 6.07918100  | -2.79715400 | -5.13906100 |
| F | 0.23980800  | 2.06104000  | 2.84830000  | H | 4.75309300  | -1.78891200 | -4.48385600 |
| F | -1.29748400 | 0.58376500  | 3.23052600  | N | -0.03389100 | -1.21601900 | -4.09350700 |
| F | 0.53658900  | 0.00462800  | 2.23570600  | C | 0.22049300  | 0.16117400  | -3.86679100 |
| C | -1.05536700 | 2.56207600  | 0.49473300  | C | 1.30644800  | 0.85717500  | -4.59805000 |
| C | -1.75815500 | 2.87880800  | -0.68122300 | C | 2.15388200  | 0.10539100  | -5.42092800 |
| C | -1.83104500 | 4.36240100  | -1.09522600 | C | 1.91366800  | -1.30298700 | -5.59608500 |
| F | -2.02422000 | 4.50663200  | -2.39564100 | C | 0.78934900  | -1.90972400 | -4.90660800 |
| F | -2.86509300 | 4.93261700  | -0.44758700 | C | 0.52985600  | -3.30398800 | -5.09642800 |
| F | -0.72066200 | 5.02484200  | -0.74225500 | C | -0.61355200 | -3.95594700 | -4.38088600 |
| O | -2.42185200 | 2.09582200  | -1.40402100 | C | 1.34465200  | -4.03973700 | -5.97250100 |
| C | 1.94027600  | -1.42626200 | -1.27063200 | C | 2.40858500  | -3.44460700 | -6.64362800 |
| C | 0.59134100  | -1.78081100 | -1.08518000 | C | 2.69707000  | -2.08184300 | -6.44384000 |
| C | 0.17133500  | -2.51287600 | 0.02222700  | H | -0.69604300 | 0.74509200  | -3.72920700 |
| C | 1.10450100  | -2.89154900 | 0.98764200  | H | 1.26913200  | 1.94366700  | -4.66294000 |
| C | 2.45023500  | -2.56659100 | 0.81909600  | H | 2.97765700  | 0.57973300  | -5.95592300 |
| C | 2.89076700  | -1.85676700 | -0.30363500 | H | -1.57009800 | -3.59388800 | -4.78579500 |
| N | 4.25410300  | -1.50167700 | -0.37433000 | H | -0.58094600 | -5.04850100 | -4.49296700 |
| C | 5.17010700  | -1.94270100 | -1.30766700 | H | -0.61209900 | -3.70361800 | -3.31075300 |
| O | 4.62119900  | -2.89137600 | -2.07510300 | H | 1.13974100  | -5.10319900 | -6.11456100 |
| C | 5.32579700  | -3.45541000 | -3.22211100 | H | 3.03386400  | -4.03871400 | -7.31328100 |
| C | 6.57465200  | -4.20384800 | -2.75254100 | H | 3.54466200  | -1.62156300 | -6.95648700 |
| C | 4.29265100  | -4.42244500 | -3.79381900 |   |             |             |             |
| C | 5.66033600  | -2.34967900 | -4.22428700 |   |             |             |             |
| O | 6.31247400  | -1.54429400 | -1.34623100 |   |             |             |             |
| H | 1.97911000  | 0.45832600  | 0.12984600  |   |             |             |             |
| H | 3.25872000  | 1.42057400  | 1.99937700  |   |             |             |             |
| H | 3.92940000  | 3.82491600  | 1.95418600  |   |             |             |             |
| H | 3.24715600  | 5.26178000  | 0.03204600  |   |             |             |             |
| H | 1.90631900  | 4.28715900  | -1.83143700 |   |             |             |             |
| H | -3.74534500 | -3.04216300 | -3.92444400 |   |             |             |             |
| H | -0.51939700 | 3.34438300  | 1.02403000  |   |             |             |             |
| H | -0.13606900 | -1.48353100 | -1.83888500 |   |             |             |             |
| H | -0.88297800 | -2.75679800 | 0.13696800  |   |             |             |             |
| H | 0.78536700  | -3.44300800 | 1.87477500  |   |             |             |             |
| H | 3.19283100  | -2.86994600 | 1.55993400  |   |             |             |             |
| H | 4.65447400  | -0.94278700 | 0.37020700  |   |             |             |             |
| H | 6.30556500  | -4.95420900 | -1.99293300 |   |             |             |             |
| H | 7.03325500  | -4.72802700 | -3.60545300 |   |             |             |             |
| H | 7.30750000  | -3.51047600 | -2.32244700 |   |             |             |             |
| H | 3.36855200  | -3.88566000 | -4.04264700 |   |             |             |             |

### TD-DFT Computational data

TD-DFT calculations were carried out using the Gaussian 09 software at The Hong Kong University of Science and Technology. All computations were performed at the B3LYP level of theory<sup>9</sup> using 6-31G(d) base set for all atoms, with the resulting structures confirmed to be stationary points through vibrational frequency analysis.

### Supplementary Tables

**Supplementary Table 6.** TD-DFT calculation results for **3a** using the optimized S0 structure.

| Compd.    | Excited State  | Transition configuration            | Transition Energy | Oscillator Strength |
|-----------|----------------|-------------------------------------|-------------------|---------------------|
| <b>3a</b> | S <sub>1</sub> | HOMO->LUMO (94%)                    | 405 nm, 3.06 eV   | 0.0037              |
|           | S <sub>2</sub> | HOMO->L+1 (98%)                     | 381 nm, 3.25 eV   | 0.0067              |
|           | S <sub>3</sub> | H-5->LUMO (12%),<br>H-1->LUMO (65%) | 378 nm, 3.28 eV   | 0.0057              |

**Supplementary Table 7.** TD-DFT calculation results for **3e** using the optimized S0 structure.

| Compd.    | Excited State  | Transition configuration            | Transition Energy | Oscillator strength |
|-----------|----------------|-------------------------------------|-------------------|---------------------|
| <b>3e</b> | S <sub>1</sub> | HOMO->LUMO (96%)                    | 440 nm, 2.82 eV   | 0.0032              |
|           | S <sub>2</sub> | H-1->LUMO (57%),<br>HOMO->L+1 (30%) | 362 nm, 3.43 eV   | 0.0049              |
|           | S <sub>3</sub> | H-1->LUMO (25%),<br>HOMO->L+1 (68%) | 361 nm, 3.43 eV   | 0.0139              |

**Supplementary Table 8.** TD-DFT calculation results for **3g** using the optimized S0 structure.

| Compd.    | Excited State  | Transition configuration | Transition Energy | Oscillator Strength |
|-----------|----------------|--------------------------|-------------------|---------------------|
| <b>3g</b> | S <sub>1</sub> | HOMO->LUMO (94%)         | 419 nm, 2.96 eV   | 0.005               |
|           | S <sub>2</sub> | HOMO->L+1 (97%)          | 361 nm, 3.43 eV   | 0.0072              |
|           | S <sub>3</sub> | H-1->LUMO (75%)          | 349 nm, 3.28 eV   | 0.0167              |

**Supplementary Table 9.** TD-DFT calculation results for **3j** using the optimized S0 structure.

| Compd.    | Excited State  | Transition configuration           | Transition Energy | Oscillator strength |
|-----------|----------------|------------------------------------|-------------------|---------------------|
| <b>3j</b> | S <sub>1</sub> | HOMO->LUMO (93%)                   | 399 nm, 3.11 eV   | 0.0038              |
|           | S <sub>2</sub> | HOMO->L+1 (97%)                    | 361 nm, 3.43 eV   | 0.0076              |
|           | S <sub>3</sub> | H-3->L+1 (12%),<br>H-1->LUMO (50%) | 336 nm, 3.69 eV   | 0.005               |



**Supplementary Table 10.** TD-DFT calculation results for **3k** using the optimized S0 structure.

| Compd.    | Excited State  | Transition configuration          | Transition Energy | Oscillator strength |
|-----------|----------------|-----------------------------------|-------------------|---------------------|
| <b>3k</b> | S <sub>1</sub> | HOMO->LUMO (92%)                  | 386 nm, 3.21 eV   | 0.0049              |
|           | S <sub>2</sub> | HOMO->L+1 (97%)                   | 360 nm, 3.44 eV   | 0.0081              |
|           | S <sub>3</sub> | H-4->L+1 (46%),<br>H-1->L+1 (35%) | 334 nm, 3.71 eV   | 0.001               |

**Supplementary Table 11.** TD-DFT calculation results for **3r** using the optimized S0 structure.

| Compd.    | Excited State  | Transition configuration                              | Transition Energy | Oscillator Strength |
|-----------|----------------|-------------------------------------------------------|-------------------|---------------------|
| <b>3r</b> | S <sub>1</sub> | HOMO->LUMO (92%)                                      | 395 nm, 3.14 eV   | 0.0045              |
|           | S <sub>2</sub> | HOMO->L+1 (97%)                                       | 385 nm, 3.22 eV   | 0.0062              |
|           | S <sub>3</sub> | H-3->L+1 (27%),<br>H-1->LUMO (30%),<br>H-1->L+1 (20%) | 383 nm, 3.43 eV   | 0.0026              |

**Supplementary Table 12.** TD-DFT calculation results for **3ag** using the optimized S0 structure.

| Compd.     | Excited State  | Transition configuration                                | Transition Energy | Oscillator strength |
|------------|----------------|---------------------------------------------------------|-------------------|---------------------|
| <b>3ag</b> | S <sub>1</sub> | HOMO->LUMO (94%)                                        | 401 nm, 3.09 eV   | 0.0038              |
|            | S <sub>2</sub> | HOMO->L+1 (98%)                                         | 355 nm, 3.49 eV   | 0.0091              |
|            | S <sub>3</sub> | H-5->LUMO (20%),<br>H-2->LUMO (27%),<br>H-1->LUMO (30%) | 337 nm, 3.28 eV   | 0.0033              |

**Supplementary Table 13.** TD-DFT calculation results for **3aj** using the optimized S0 structure.

| Compd.     | Excited State  | Transition configuration            | Transition Energy | Oscillator strength |
|------------|----------------|-------------------------------------|-------------------|---------------------|
| <b>3aj</b> | S <sub>1</sub> | HOMO->LUMO(91%)                     | 390 nm, 3.18 eV   | 0.0034              |
|            | S <sub>2</sub> | HOMO->L+1 (91%)                     | 345 nm, 3.59 eV   | 0.0113              |
|            | S <sub>3</sub> | H-2->LUMO (15%),<br>H-1->LUMO (40%) | 332 nm, 3.73 eV   | 0.0034              |

**Supplementary Table 14.** TD-DFT calculation results for **3an** using the optimized S0 structure.

| Compd.     | Excited State  | Transition configuration            | Transition Energy | Oscillator strength |
|------------|----------------|-------------------------------------|-------------------|---------------------|
| <b>3an</b> | S <sub>1</sub> | HOMO->LUMO (94%)                    | 407 nm, 3.05 eV   | 0.0033              |
|            | S <sub>2</sub> | HOMO->L+1 (98%)                     | 360 nm, 3.44 eV   | 0.0093              |
|            | S <sub>3</sub> | H-5->LUMO (15%),<br>H-1->LUMO (64%) | 340 nm, 3.65 eV   | 0.0073              |

**Supplementary Table 15.** TD-DFT calculation results for **3ao** using the optimized S0 structure.

| Compd.     | Excited State  | Transition configuration            | Transition Energy | Oscillator strength |
|------------|----------------|-------------------------------------|-------------------|---------------------|
| <b>3ao</b> | S <sub>1</sub> | HOMO->LUMO (96%)                    | 424 nm, 2.92 eV   | 0.0019              |
|            | S <sub>2</sub> | HOMO->L+1 (99%)                     | 376 nm, 3.30 eV   | 0.0068              |
|            | S <sub>3</sub> | H-5->LUMO (16%),<br>H-1->LUMO (65%) | 346 nm, 3.58 eV   | 0.0079              |

## Supplementary References

- (1) J. Wang, Y. Li, J. Sun, H. Wang, Z. Jin, Y. R. Chi, *ACS Catal.* **2018**, *8*, 9859.
- (2) N. Thirupathi, Y. K. Kumar, R. Kant, M. S. Reddy, *Adv. Synth. & Catal.* **2014**, *356*, 1823.
- (3) J. Liu, D. Ba, Y. Chen, S. Wen, G. Cheng, *Chem. Commun.*, **2020**, *56*, 4078.
- (4) Z.-S. Chen, F. Yang, H. Ling, M. Li, J.-M. Gao, K. Ji, *Org. Lett.* **2016**, *18*, 5828.
- (5) (a) C. T. Lee, W. T. Yang, R. G. Parr, *Phys. Rev. B* **1988**, *37*, 785; (b) A. D. Becke, *J. Chem. Phys.* **1993**, *98*, 5648.
- (6) F. Weigend, R. Ahlrichs, *Phys. Chem. Chem. Phys.* **2005**, *7*, 3297.
- (7) (a) S. Grimme, J. Antony, S. Ehrlich, H. Krieg, *J. Chem. Phys.* **2010**, *132*, 154104; (b) S. Grimme, S. Ehrlich, L. Goerigk, *J. Compt. Chem.* **2011**, *32*, 1456.
- (8) A. V. Marenich, C. J. Cramer, D. G. Truhlar, *J. Phys. Chem. B* **2009**, *113*, 6378.
- (9) M. J. Frisch, G. W. Trucks, H. B. Schlegel, G. E. Scuseria, M. A. Robb, J. R. Cheeseman, G. Scalmani, V. Barone, B. Mennucci, G. A. H. Petersson, M. Nakatsuji, X. Caricato, H. P. F. Li, A. Hratchian, J. Izmaylov, G. Bloino, J. L. Zheng, M. Sonnenberg, M. Hada, K. Ehara, R. Toyota, J. Fukuda, M. Hasegawa, T. Ishida, Y. Nakajima, O. Honda, H. Kitao, T. Nakai, J. A. Vreven, J. E. Montgomery Jr., F. Peralta, M. Ogliaro, J. J. Bearpark, E. Heyd, K. N. Brothers, V. N. Kudin, T. Staroverov, R. Keith, J. Kobayashi, K. Normand, A. Raghavachari, J. C. Rendell, S. S. Burant, J. Iyengar, M. Tomasi, N. Cossi, J. M. Rega, M. Millam, J. E. Klene, J. B. Knox, V. Cross, C. Bakken, J. Adamo, R. Jaramillo, R. E. Gomperts, O. Stratmann, A. J. Yazyev, R. Austin, C. Cammi, J. W. Pomelli, R. L. Ochterski, K. Martin, V. G. Morokuma, G. A. Zakrzewski, P. Voth, J. J. Salvador, S. Dannenberg, A. D. Dapprich, O. Daniels, J. B. Farkas, J. V. Foresman, J. Ortiz, J. Cioslowski, D. J. Fox, Gaussian 09 Revision C.01, 2010.
