# Supplementary material for: Copper-catalyzed alkyne oxidation/Büchner-type ring-expansion to access benzo[6,7]azepino[2,3-b]quinolines and pyridine-based diones
Source: PubMed Central journal article supplement (PMC9941089; doi:10.1038/s42004-023-00840-6), 2023-02-20
Supplement: 42004_2023_840_MOESM2_ESM.pdf [file 42004_2023_840_MOESM2_ESM.pdf]

# Description of Additional Supplementary Files

**File name:** Supplementary Data 1

**Description:** Cartesian coordinates for the optimized structures.

**File name:** Supplementary Data 2

**Description:** NMR spectra.

**File name:** Supplementary Data 3

**Description:** Cif file of 3a

**File name:** Supplementary Data 4

**Description:** Cif file of 3r

**File name:** Supplementary Data 5

**Description:** Cif file of 3aba

**File name:** Supplementary Data 6

**Description:** Cif file of 5p

**File name:** Supplementary Data 7

**Description:** Cif file of 8
